# Supplementary material for: Substrate controlled, regioselective carbopalladation for the one-pot synthesis of C4-substituted tetrahydroisoquinoline analogues
Source: Royal Society of Chemistry journal article supplement (doi:10.1039/d0ra01539c), 2020-01-01
Supplement: d0ra01539c1.pdf [file d0ra01539c1.pdf]

## Supporting Information

### **Substrate Controlled, Regioselective Carbopalladation for the One-pot Synthesis of C4-Substituted Tetrahydroisoquinoline Analogues.**

Singarajahalli Mundarinti Krishna Reddy,<sup>[a]</sup> Pavithira Suresh,<sup>[a]</sup> Subbiah Thamocharan,<sup>[b]</sup> Jagadeesh Babu Nanubolu,<sup>[c]</sup> Suriseti Suresh\*<sup>[d]</sup> and Subramaniapillai Selva Ganesan\*<sup>[a]</sup>

<sup>[a]</sup>Department of Chemistry, School of Chemical and Biotechnology, SASTRA Deemed University, Thanjavur-613401, Tamil Nadu, India; <sup>[b]</sup>Biomolecular Crystallography Laboratory, Department of Bioinformatics, School of Chemical and Biotechnology, SASTRA Deemed University, Thanjavur 613401, India; <sup>[c]</sup>Room No 150, Centre for X-ray Crystallography, CSIR-Indian Institute of Chemical Technology, Hyderabad- 500007, India; <sup>[d]</sup>Organic Synthesis & Process Chemistry, CSIR-Indian Institute of Chemical Technology, Hyderabad-500007, India.

Total number of pages: 99

### Table of Contents

| <b>S. No.</b> | <b>Details</b>                              | <b>Page no</b> |
|---------------|---------------------------------------------|----------------|
| <b>1</b>      | Materials & methods                         | S3             |
| <b>2</b>      | Preparation & Characterization of compounds | S3-S17         |
| <b>3</b>      | Scanned copies of NMR spectra               | S18-S90        |
| <b>4</b>      | Crystal data and theoretical calculations   | S91-S99        |

## Materials and methods:

All reactions were carried out in oven-dried glassware with magnetic stirring. All reactions were carried out under nitrogen atmosphere. Cesium carbonate was purchased from Merck. Silica gel 200-400 (code 5699D00500) mesh size was purchased from Loba Chemie Pvt Ltd. Melting points were uncorrected.  $^1\text{H}$  NMR was recorded Bruker model 300 MHz and  $^{13}\text{C}\{1\text{H}\}$  75 MHz spectrometer using TMS as an internal standard and  $\text{CDCl}_3$  as a solvent. High resolution mass spectra were obtained using Q-TOF mass spectrometer or Thermofisher Exactive Orbitrap mass spectrometer.

### General procedure for synthesis of Tertiary amine 1:

Substituted cinnamaldehyde (2.0 mmol, 1 equiv.) and amine (4.0 mmol, 2 equiv.) were dissolved in methanol (5 mL) taken in a 25 mL sealed tube and anhydrous magnesium sulphate (4.0 mmol, 480 mg) was added. The reaction mixture was stirred at 50 °C for 10 hours in an oil bath. After complete consumption of the starting material, the reaction mixture was cooled to 0 °C and sodium borohydride (4.0 mmol, 152 mg) was added to the reaction mixture and stirred for 2 hours. Then, the reaction mixture was quenched with saturated ammonium chloride solution (3 mL). Then contents were poured into a separating funnel (60 mL) and extracted with ethyl acetate (1 × 5 mL) and the organic layer was extracted. The aqueous layer was further extracted with ethyl acetate (2 × 5 mL) and the combined organic extracts were washed with water (1 × 10 mL), brine (1 × 10 mL), dried over anhydrous  $\text{Na}_2\text{SO}_4$ , filtered and concentrated under reduced pressure. The crude residue was used for next step without further purification.

In a 25 mL sealed reaction tube, 2-bromobenzyl bromide (1.0 mmol, 250 mg) and amine (1.0 mmol, 1.0 equiv.) were dissolved in DMF (5 mL) and  $\text{K}_2\text{CO}_3$  (2.0 mmol, 276 mg)

were added and heated to 90 °C for 10 hours in an oil bath. After complete consumption of the starting material, the reaction mixture was cooled to room temperature and water (1 × 10 mL) was added to the reaction mixture. Then contents were poured into a separating funnel (60 mL) and extracted with ethyl acetate (1 × 5 mL) and the organic layer was separated. The aqueous layer was further extracted with ethyl acetate (2 × 5 mL) and the combined organic extracts were washed with brine solution (1 × 10 mL). Finally the organic layer was dried over anhydrous Na<sub>2</sub>SO<sub>4</sub>, filtered and concentrated under reduced pressure. The crude compound was purified by column chromatography (eluent 5% EtOAc hexane).

**[(2-bromophenyl)methyl](butyl)[(2E)-3-phenylprop-2-en-1-yl]amine (1a):** : Yellow color liquid: 545 mg (95 %). <sup>1</sup>H-NMR (300 MHz, CDCl<sub>3</sub>) δ 7.59 (d, *J* = 7.5 Hz, 1H), 7.51 (dd, *J* = 6 Hz, 1.2 Hz, 1H), 7.38-7.18 (m, 6 H), 7.08 (td, *J* = 7.8 Hz, 1.8 Hz, 1H), 6.53 (d, *J* = 15.9 Hz, 1H), 6.29 (dt, *J* = 15.9 Hz, 6.6 Hz, 1H), 3.70 (s, 2H), 3.27 (dd, *J* = 6.3 Hz, 0.9 Hz, 2H), 2.53 (t, *J* = 7.2 Hz, 2H), 1.55-1.46 (m, 2H) 1.38-1.25(m, 2H) 0.88 (t, *J* = 7.2 Hz, 3H). <sup>13</sup>C{<sup>1</sup>H} NMR (75 MHz, CDCl<sub>3</sub>) δ 142.0, 139.2, 137.2, 132.1, 130.2, 128.5, 128.4, 128.0, 127.8, 127.2, 126.2, 100.1, 62.7, 56.3, 53.6, 29.3, 20.5, 14.0. HRMS (ESI, *m/z*): calcd for C<sub>20</sub>H<sub>25</sub>NBr [M+H]<sup>+</sup> 358.1165; found, 358.1166.

**[(2-bromophenyl)methyl](ethyl)[(2E)-3-phenylprop-2-en-1-yl]amine (1b):** Yellow color liquid: 187 mg (71%). <sup>1</sup>H-NMR (300 MHz, CDCl<sub>3</sub>) δ 7.59 (dd, *J* = 9 Hz, 1.5 Hz, 1H), 7.51 (dd, *J* = 6 Hz, 1.2 Hz, 1H), 7.38-7.19 (m, 6H), 7.08 (td, *J* = 7.8 Hz, 3.0 Hz, 1H), 6.54 (d, *J* = 15 Hz, 1H), 6.29 (dt, *J* = 15.9 Hz, 9 Hz, 1H), 3.70 (s, 2H), 3.29 (dd, *J* = 6, 1.2 Hz, 2H), 2.62 (q, *J* = 7.2 Hz, 2H), 1.10 (t, *J* = 7.2 Hz, 3H). <sup>13</sup>C{<sup>1</sup>H} NMR (75 MHz, CDCl<sub>3</sub>) δ 142.0, 139.3, 137.3, 132.2, 130.3, 128.6, 128.5, 128.1, 127.8, 127.3, 126.3, 100.2 62.2, 55.9, 47.7, 12.0. HRMS (ESI, *m/z*): calcd for C<sub>18</sub>H<sub>21</sub>BrN<sup>+</sup> [M+H]<sup>+</sup> 330.0852; found, 330.0853.

**[(2-bromophenyl)methyl](*tert*-butyl)[(2*E*)-3-phenylprop-2-en-1-yl]amine (1c):**

Yellow color liquid: 194 mg (68 %). <sup>1</sup>H-NMR (300 MHz, CDCl<sub>3</sub>): δ 7.74 (d, *J* = 7.8 Hz, 1H), 7.70 (d, *J* = 8.1 Hz, 1H), 7.34-7.14 (m, 6H), 6.86 (t, *J* = 7.8 Hz, 1H), 6.37 (d, *J* = 15.9 Hz, 1H), 6.15 (dt, *J* = 15.9 Hz, 6.6 Hz, 1H), 3.71 (s, 2H), 3.41 (d, *J* = 6.6 Hz, 2H) 1.16(s, 9H). <sup>13</sup>C{<sup>1</sup>H} NMR (75 MHz, CDCl<sub>3</sub>) δ 143.2, 137.7, 136.4, 129.5, 129.2, 129.1, 127.3, 126.9, 126.7, 125.9, 125.1, 97.9, 56.8, 54.2, 51.6, 26.6. HRMS (ESI, *m/z*): calcd for C<sub>20</sub>H<sub>25</sub>BrN<sup>+</sup> [M+H]<sup>+</sup> 358.1165; found, 358.1166.

**[(2-bromophenyl)methyl](ethyl)[(2*E*)-3-(4-methoxyphenyl)prop-2-en-1-yl]amine (1d):**

Yellow color liquid: 334 mg (74 %). <sup>1</sup>H-NMR (300 MHz, CDCl<sub>3</sub>): 7.58 (dd, *J* = 7.8 Hz, 1.5 Hz 1H), 7.51 (dd, *J* = 7.8 Hz, 1.2 Hz 1H), 7.32-7.26 (m, 3H), 7.08 (td, *J* = 7.8 Hz, 1.8 Hz, 1H), 6.84 (d, *J* = 9.0 Hz, 2H), 6.48 (d, *J* = 15.9 Hz, 1H), 6.15 (dt, *J* = 15.6 Hz, 6.6 Hz, 1H), 3.80 (s, 3H), 3.69 (s, 2H), 3.27 (dd, *J* = 6.6 Hz, 1.2 Hz, 2H), 2.61 (q, *J* = 6.9 Hz, 2H), 1.09 (t, *J* = 7.2 Hz, 3H). <sup>13</sup>C{<sup>1</sup>H} NMR (75 MHz, CDCl<sub>3</sub>) δ 159.0, 139.3, 132.6, 131.7, 130.7, 130.1, 128.1, 127.5, 127.2, 125.5, 124.3, 114.0, 57.2, 56.1, 55.3, 47.7, 12.1. HRMS (ESI, *m/z*): calcd for C<sub>19</sub>H<sub>23</sub>BrNO<sup>+</sup> [M+H]<sup>+</sup> 360.0958; found 360.0969.

**[(2-bromophenyl)methyl](butyl)[(2*E*)-3-(4-methoxyphenyl)prop-2-en-1-yl]amine (1e):**

Yellow color liquid: 484 mg (60 %). <sup>1</sup>H-NMR (300 MHz, CDCl<sub>3</sub>): δ 7.60 -7.55 (m, 1H), 7.50 (dd, *J* = 6.9 Hz, 1.2 Hz, 1H), 7.31-7.28 (m, 3H), 7.07 (td, *J* = 7.8 Hz, 1.5 Hz, 1H), 6.83 (d, *J* = 8.7 Hz, 2H) 6.47 (d, *J* = 15.9 Hz, 1H), 6.14 (dt, *J* = 15.9 Hz, 6.3 Hz, 1H), 3.79 (s, 3H), 3.68 (s, 2H), 3.24(d, *J* = 6.6 Hz, 2H), 2.52 (t, *J* = 7.5 Hz, 2H), 1.55-1.45 (m, 2H) 1.37-1.25 (m, 2H) 0.87 (t, *J* = 7.2 Hz, 3H). <sup>13</sup>C{<sup>1</sup>H} NMR (75 MHz, CDCl<sub>3</sub>) δ 159.0, 139.4, 132.6,

131.7, 130.6, 130.1, 128.1, 127.4, 127.2, 125.6, 124.3, 114.0, 57.7, 56.4, 55.3, 53.7, 29.4, 20.6, 14.1. HRMS (ESI,  $m/z$ ): calcd for  $C_{21}H_{27}ONBr$   $[M+H]^+$  388.1271; found 388.1263.

**[(2-bromophenyl)methyl](tert-butyl)[(2E)-3-(4-methoxyphenyl)prop-2-en-1-yl]amine (1f):**

Yellow color liquid: 448 mg (85%).  $^1H$ -NMR (300 MHz,  $CDCl_3$ ):  $\delta$  7.79 (d,  $J = 7.8$  Hz, 1H), 7.41 (dd,  $J = 8.1$  Hz, 0.9 Hz, 1H), 7.29-7.24(m, 1H), 7.2(d,  $J = 8.7$  Hz, 2H), 7.06 (td,  $J = 7.8$  Hz, 1.8 Hz, 1H), 6.77 (d,  $J = 8.7$  Hz, 2H) 6.31 (d,  $J = 15.9$  Hz, 1H), 6.01 (dt,  $J = 15.6$  Hz, 6.9 Hz, 1H), 3.80 (s, 2H), 3.77(s, 3H) 3.38 (d,  $J = 6.6$  Hz, 2H), 1.15(s, 9H).  $^{13}C\{1H\}$  NMR (75 MHz,  $CDCl_3$ )  $\delta$  158.8, 141.9, 132.1, 130.5, 130.4, 130.0, 127.9, 127.5, 127.3, 126.9, 123.0, 113.8, 55.3, 55.2, 52.7, 52.4, 27.6. HRMS (ESI,  $m/z$ ): calcd for  $C_{21}H_{27}ONBr$   $[M+H]^+$  388.1271; found, 388.1264.

**Benzyl [(2-iodophenyl) methyl][(2E)-3-(4-methoxyphenyl)prop-2-en-1-yl]amine (1g):**

Yellow color liquid: 710 mg (72 %).  $^1H$ -NMR (300 MHz,  $CDCl_3$ ):  $\delta$  7.80 (d,  $J = 7.8$  Hz, 1H), 7.61 (d,  $J = 6.9$  Hz, 1H), 7.41-7.20 (m, 8H), 6.93 (td,  $J = 8.1$  Hz, 1.5 Hz, 1H) 6.84 (d,  $J = 8.7$  Hz, 2H), 6.47 (d,  $J = 15.9$  Hz, 1H), 6.18 (dt,  $J = 15.6$  Hz, 6.6 Hz, 1H), 3.80 (s, 3H), 3.67(s, 4H) 3.24 (d,  $J = 6.6$  Hz, 2H).  $^{13}C\{1H\}$  NMR (75 MHz,  $CDCl_3$ ):  $\delta$  159.0, 141.8, 139.5, 139.4, 132.2, 130.3, 130.0, 128.8, 128.6, 128.3, 128.1, 127.5, 126.9, 125.0, 113.9, 100.2, 62.2, 58.0, 55.9, 55.3. HRMS (ESI,  $m/z$ ): calcd for  $C_{24}H_{25}ONI$   $[M+H]^+$  470.0975; found, 470.0974.

**[(2-iodophenyl)methyl][(4-methoxyphenyl)methyl][(2E)-3-phenylprop-2-en-1-yl]amine (1h) :**

Yellow color liquid: 486 mg (74 %).  $^1H$ -NMR (300 MHz,  $CDCl_3$ ):  $\delta$  7.80 (dd,  $J = 7.8$  Hz, 0.9 Hz, 1H), 7.60 (dd,  $J = 7.5$  Hz, 1.2 Hz, 1H), 7.38-7.19(m, 8H) 6.92 (td,  $J = 7.8$  Hz, 1.5 Hz, 1H) 6.85 (d,  $J = 8.4$  Hz, 2H) 6.53 (d,  $J = 15.9$  Hz, 1H), 6.31 (dt,  $J = 15.9$  Hz, 6.3 Hz, 1H), 3.80 (s, 3H), 3.66 (s, 2H), 3.62 (s, 2H), 3.24 (d,  $J = 6.3$  Hz, 2H).  $^{13}C\{1H\}$  NMR (75 MHz,

CDCl<sub>3</sub>) δ 158.7, 141.9, 139.4, 137.3, 132.7, 131.4, 130.4, 130.1, 128.7, 128.6, 128.2, 127.5, 127.4, 126.4, 113.8, 100.4, 62.2, 57.4, 55.7, 55.3. HRMS (ESI, *m/z*): calcd for C<sub>24</sub>H<sub>25</sub>ONi [M+H]<sup>+</sup> 470.0975; found, 470.0975.

**1*N*-[(2-bromophenyl)methyl]-4-methyl-*N*-[(2*E*)-3-phenylprop-2-en-1-yl]aniline**

**(1i):** Yellow color liquid: 160 mg (68 %). <sup>1</sup>H-NMR (300 MHz, CDCl<sub>3</sub>): δ 7.86 (d, *J* = 7.8 Hz, 1H), 7.37-7.24 (m, 5H), 7.21-7.16 (m, 2H), 7.02-6.94 (m, 3H), 6.59 (d, *J* = 8.7 Hz, 2H), 6.52-6.43 (m, 1H), 6.29 (dt, *J* = 15.9, 5.1 Hz, 1H), 4.43 (s, 2H), 4.16 (d, *J* = 4.8 Hz, 2H), 2.23 (s, 3H). <sup>13</sup>C{<sup>1</sup>H} NMR (75 MHz, CDCl<sub>3</sub>) δ 146.3, 139.9, 139.5, 136.9, 131.5, 129.8, 128.7, 128.6, 128.4, 127.8, 127.5, 126.4, 126.0, 125.5, 112.4, 97.8, 60.1, 52.9, 20.3. HRMS (ESI, *m/z*): calcd for C<sub>23</sub>H<sub>23</sub>BrN<sup>+</sup> [M+H]<sup>+</sup> 392.1008; found, 392.1014.

***N*-[(2-bromophenyl)methyl]-4-methyl-*N*-(prop-2-en-1-yl)aniline (1j):** Yellow color liquid: 520 mg (95 %). <sup>1</sup>H-NMR (300 MHz, CDCl<sub>3</sub>) δ 7.57 (dd, *J* = 7.8 Hz, 0.6 Hz, 1H), 7.21-7.15 (m, 2H), 7.14-7.08 (m, 1H), 7.00 (d, *J* = 8.4 Hz, 2H), 6.54 (d, *J* = 8.7 Hz, 2H), 5.96-5.84 (m, 1H), 5.25-5.17 (m, 2H), 4.50 (s, 2H), 4.01 (d, *J* = 4.8 Hz, 2H), 2.23 (s, 3H), <sup>13</sup>C{<sup>1</sup>H} NMR (75 MHz, CDCl<sub>3</sub>) δ 146.3, 137.4, 133.6, 132.8, 129.7, 128.3, 128.0, 127.5, 125.8, 122.7, 116.4, 112.2, 55.0, 53.4, 20.2. HRMS (ESI, *m/z*): calcd for C<sub>17</sub>H<sub>19</sub>BrN<sup>+</sup> [M+H]<sup>+</sup> 316.0695; found, 316.0706.

**[(2-bromophenyl)methyl]bis(prop-2-en-1-yl)amine (1k):**

Yellow color liquid: 176 mg (60 %). <sup>1</sup>H-NMR: δ 7.56 (d, *J* = 7.5 Hz, 1H), 7.51 (d, *J* = 8.1 Hz, 1H), 7.28 (t, *J* = 7.5 Hz, 1H), 7.08 (t, *J* = 7.5 Hz, 1H), 5.95-5.82 (m, 2H), 5.24-5.12 (m, 4H), 3.65 (s, 2H), 3.12 (d, *J* = 6.3 Hz, 4H). <sup>13</sup>C{<sup>1</sup>H} NMR (75 MHz, CDCl<sub>3</sub>) δ 139.0, 135.8,

132.6, 130.5, 128.2, 127.3, 124.3, 117.5, 57.0, 56.8. HRMS (ESI,  $m/z$ ): calcd for  $C_{13}H_{17}BrN^+$   $[M+H]^+$  266.0539; found, 266.0540.

**[(2-bromophenyl)methyl](octyl)(prop-2-en-1-yl)amine:(1l).**

Yellow color liquid: 131 mg (58 %).  $^1H$ NMR:  $\delta$  7.56 (d,  $J = 7.5$  Hz, 1H), 7.51 (d,  $J = 8.1$  Hz, 1H), 7.30-7.26 (m, 1H), 7.08 (t,  $J = 6.3$  Hz, 1H), 5.96-5.83 (m, 1H), 5.22-5.10 (m, 2H), 3.64 (s, 2H), 3.11 (d,  $J = 6.3$  Hz, 2H), 2.46 (t,  $J = 7.2$  Hz, 2H), 1.50-1.43 (m, 2H), 1.25 (br s, 10H), 0.87 (t,  $J = 6.3$  Hz, 3H).  $^{13}C\{1H\}$  NMR (75 MHz,  $CDCl_3$ )  $\delta$  139.4, 136.1, 132.5, 130.5, 128.0, 127.2, 124.2, 117.1, 57.6, 57.2, 53.9, 31.9, 29.5, 29.3, 27.4, 27.1, 22.6, 14.1. HRMS (ESI,  $m/z$ ): calcd for  $C_{18}H_{29}BrN^+$   $[M+H]^+$  338.1478; found, 338.1493.

**[(2-bromophenyl)methyl][(2E)-3-phenylprop-2-en-1-yl](prop-2-en-1-yl)amine (1m):**

Yellow color liquid: 256 mg (75 %).  $^1H$  NMR:  $\delta$  7.59 (d,  $J = 7.8$  Hz, 1H), 7.51 (dd,  $J = 7.8$  Hz, 0.9 Hz, 1H), 7.38-7.19 (m, 6H), 7.01 (td,  $J = 7.8$  Hz, 1.8 Hz 1H), 6.54 (d,  $J = 15.9$  Hz, 1H) 6.28 (dt,  $J = 15.9$  Hz, 6.6 Hz, 1H) 5.99-5.86 (m, 1H) 5.30-5.04 (m, 2H), 3.71. (s, 2H), 3.28 (d,  $J = 6.3$  Hz, 2H) 3.18 (d,  $J = 6.3$  Hz, 2H).  $^{13}C\{1H\}$  NMR (75 MHz,  $CDCl_3$ )  $\delta$  139.0, 137.2, 135.8, 132.7, 132.6, 130.6, 128.6, 128.3, 127.6, 127.4, 127.3, 126.4, 124.4, 117.7, 57.2, 57.0, 56.3. HRMS (ESI,  $m/z$ ): calcd for  $C_{19}H_{21}BrN^+$   $[M+H]^+$  342.0852; found, 342.0847.

**[(2-iodophenyl)methyl][(2E)-3-(4-methoxyphenyl)prop-2-en-1-yl](prop-2-en-1-yl)amine (1n):**

Yellow color liquid: 656 mg (89 %).  $^1H$ NMR:  $\delta$  7.80 (d,  $J = 7.8$  Hz, 1H), 7.54 (d,  $J = 7.5$  Hz, 1H), 7.35-7.29 (m, 3H), 6.93 (t,  $J = 7.8$  Hz, 1H), 6.84 (d,  $J = 8.7$  Hz, 2H), 6.47 (d,  $J =$



15.9 Hz, 1H), 6.13 (dt,  $J = 15.9$  Hz, 6.3 Hz, 1H), 5.99-5.86 (m, 1H) 5.26-5.14 (m, 2H), 3.80 (s, 3H), 3.64 (s, 2H), 3.26 (d,  $J = 6.3$  Hz, 2H), 3.17 (d,  $J = 6.3$  Hz, 2H).  $^{13}\text{C}\{1\text{H}\}$  NMR (75 MHz,  $\text{CDCl}_3$ )  $\delta$  159.0, 141.8, 139.3, 135.8, 132.0, 130.2, 130.0, 128.5, 128.1, 127.5, 125.2, 117.5, 113.9, 100.2, 62.0, 56.8, 56.1, 55.3. HRMS (ESI,  $m/z$ ): calcd for  $\text{C}_{20}\text{H}_{23}\text{INO}^+$   $[\text{M}+\text{H}]^+$  420.0819; found, 420.0820.

**[(2-bromophenyl)methyl][(2E)-2-methylbut-2-en-1-yl][(2E)-3-phenylprop-2-en-1-yl]amine:(1o)**. Yellow color liquid: 225 mg (76 %).  $^1\text{H}$ NMR:  $\delta$  7.63 (d,  $J = 7.5$  Hz, 1H), 7.50 (d,  $J = 7.8$  Hz, 1H), 7.34-7.18(m, 6H) 7.09-7.04 (m, 1H,) 6.52 (d,  $J = 15.9$  Hz, 1H) 6.32-6.22 (m, 1H) 5.45-5.41 (m, 1H) 3.63 (s, 2H), 3.18 (d,  $J = 6.3$  Hz, 2H), 3.00 (s, 2H), 1.65 (s, 3H) 1.60 (d,  $J = 6.6$  Hz, 3H),  $^{13}\text{C}\{1\text{H}\}$  NMR (75 MHz,  $\text{CDCl}_3$ )  $\delta$  142.2, 139.3, 137.3, 134.0, 132.3, 130.2, 128.5, 128.4, 128.0, 127.8, 127.3, 126.3, 122.0, 100.1, 62.8, 62.1, 55.9, 14.8, 13.4. . HRMS (ESI,  $m/z$ ): calcd for  $\text{C}_{21}\text{H}_{25}\text{BrN}^+$   $[\text{M}+\text{H}]^+$  370.1165; found, 370.1176.

**[(2-bromophenyl)methyl][(2E)-2-methylbut-2-en-1-yl] (prop-2-en-1-yl)amine (1p)**: Yellow color liquid: 479 mg (68%)  $^1\text{H}$  NMR:  $\delta$  7.79 (d,  $J = 7.8$  Hz, 1H), 7.54 (d,  $J = 6.6$  Hz, 1H), 7.31 (t,  $J = 6.9$  Hz, 1H ) 6.91(t,  $J = 7.5$ Hz 1H) 5.96-5.83 (m, 1H) 5.43-5.39 (m, 1H,) 5.22-5.10 (m, 2H) 3.52 (s, 2H), 3.03 (d,  $J = 6.3$  Hz, 2H), 2.94 (s, 2H), 1.62 (s, 3H) 1.59 (d,  $J = 6.9$  Hz, 3H),  $^{13}\text{C}\{1\text{H}\}$  NMR (75 MHz,  $\text{CDCl}_3$ )  $\delta$  142.2, 139.2, 136.0, 134.0, 130.1, 128.3, 128.0, 121.9, 117.2, 100.1, 62.5, 62.0, 56.5, 14.7, 13.3. HRMS (ESI,  $m/z$ ): calcd for  $\text{C}_{15}\text{H}_{21}\text{BrN}^+$   $[\text{M}+\text{H}]^+$  294.0852; found, 294.0850.

**N-[(2-bromophenyl)methyl]-4-methyl-N-[(2E)-2-methylbut-2-en-1-yl]aniline (1q)**: White color solid: 162mg (65%). MP: 70-75 °C.  $^1\text{H}$ NMR:  $\delta$  7.58-7.55 (m, 1H), 7.22-7.08 (m, 3H), 6.98 (d,  $J = 8.7$  Hz, 2H) 6.50 (d,  $J = 8.7$  Hz, 2H) 5.39-5.33 (m, 1H) 4.48 (s, 2H), 3.87 (s, 2H), 2.22 (s, 3H), 1.63(brs, 6H).  $^{13}\text{C}\{1\text{H}\}$  NMR (75 MHz,  $\text{CDCl}_3$ )  $\delta$  146.6, 137.4, 132.9,

130.6, 129.7, 128.2, 128.0, 127.5, 125.4, 122.8, 119.0, 112.1, 58.0, 54.7, 20.3, 14.2, 13.2.

HRMS (ESI,  $m/z$ ): calcd for  $C_{19}H_{23}BrN^+$   $[M+H]^+$  344.1008; found, 344.1005.

**[(2-bromophenyl)methyl][(2E)-2,3-diphenylprop-2-en-1-yl]ethylamine (1r):** Yellow color liquid: 370 mg (72%)  $^1H$ NMR:  $\delta$  7.48-7.47 (m, 1H) 7.46-6.96 (m, 13H), 6.69 (s, 1H), 3.71 (s, 2H), 3.44 (s, 2H) 2.62 (q,  $J = 7.2$  Hz, 2H), 1.04 (t,  $J = 6.9$  Hz, 3H).  $^{13}C\{1H\}$  NMR (75 MHz,  $CDCl_3$ )  $\delta$  140.7, 140.6, 139.3, 137.1, 132.4, 130.5., 129.3, 128.9, 128.4, 128.2, 127.9, 127.2, 127.0.,126.5, 124.1, 62.6., 57.2, 47.7, 12.1. HRMS (ESI,  $m/z$ ): calcd for  $C_{24}H_{25}BrN^+$   $[M+H]^+$  406.1165; found, 406.1160.

**[(2-bromophenyl)methyl][(2E)-3-(4-methoxyphenyl)prop-2-en-1-yl][(2E)-3-(4-nitrophenyl)prop-2-en-1-yl]amine.(1s):** yellow color liquid: 316 mg (60%)  $^1H$ NMR:  $\delta$  8.15 (d,  $J = 9$  Hz, 2H), 7.60 (dd,  $J = 7.5, 1.2$  Hz, 1H ), 7.52 (dd,  $J = 8.1, 1.2$  Hz, 1H ), 7.45 (d,  $J = 8.7$  Hz, 2H) 7.33-7.29 (m, 3H) 7.10 (dt,  $J = 7.5, 1.5$  Hz, 1H) 6.85 (d,  $J = 8.7$  Hz, 2H), 6.62 (d,  $J = 16.2$  Hz, 1H), 6.53-6.43 (m, 2H), 6.17 (td,  $J = 15.9, 6.6$  Hz, 1H) 3.80 (s, 3H), 3.76 (s, 2H), 3.37 (d,  $J = 6.0$  Hz, 2H), 3.33 (d,  $J = 6.3$  Hz, 2H).  $^{13}C\{1H\}$  NMR (75 MHz,  $CDCl_3$ )  $\delta$  159.1, 146.7, 143.6, 138.6, 133.3, 132.7, 132.4, 130.6, 130.2, 129.7, 128.4, 127.4, 127.3, 126.7, 124.7, 124.4, 124.0, 114.0, 57.5, 56.8, 56.2, 55.3. HRMS (ESI,  $m/z$ ): calcd for  $C_{26}H_{26}BrN_2O_3^+$   $[M+H]^+$  493.1121; found, 493.1120.

### General procedure for synthesis C4-substituted Tetrahydroisoquinoline 3:

In 5 mL glass vial containing aryl halide (0.1 mmol, 1.0 equiv. ) in toluene (3 mL),  $Cs_2CO_3$  (0.2 mmol, 65 mg) was added. Then reaction mass was purged with nitrogen before and after addition of  $Pd(OAc)_2$  (0.01 mmol, 2.24 mg ) and  $PPh_3$  (0.02 mmol, 5.24 mg). Then the reaction mass was stirred for 24 h at 110 °C in an oil bath. After complete consumption of

the starting material, the reaction mixture was cooled to room temperature. Then the reaction vessel was opened and the contents were poured into a separating funnel (60 ml). Water (5 mL) and ethyl acetate (5 mL) were added into the separating funnel, extracted and the organic layer was isolated. The aqueous layer was further extracted with ethyl acetate (2×5 mL) and the combined organic extracts were washed with brine solution (1 × 10 mL). Finally the organic layer was dried over anhydrous Na<sub>2</sub>SO<sub>4</sub>, filtered and concentrated under reduced pressure. The obtained crude mixture was purified on neutral alumina column with 2% ethyl acetate in hexanes to afford the pure product.

**(4Z)-2-butyl-4-(phenylmethylidene)-1, 2, 3, 4-tetrahydroisoquinoline (3a):**

(Reaction performed with 0.08 mmol (30 mg) scale of **1a**). Yellow color liquid: 22 mg (95%). <sup>1</sup>H-NMR (300 MHz, CDCl<sub>3</sub>) . δ 7.78-7.75 (m, 1H), 7.41-7.36 (m, 2H), 7.31-7.26 (m, 3H), 7.24-7.20 (m, 3H), 7.10-7.08 (m, 1H), 3.74 (s, 2H), 3.66 (s, 2H), 2.48 (t, *J* = 7.5 Hz, 2H), 1.52-1.42 (m, 2H) 1.35-1.23 (m, 2H) 0.87 (t, *J* = 7.2 Hz, 3H). ). <sup>13</sup>C{<sup>1</sup>H} NMR (75 MHz CDCl<sub>3</sub>) δ 137.4, 135.2, 133.4, 133.4, 129.4, 128.2, 127.5, 127.0, 126.8, 126.7, 123.4, 123.3, 57.4, 56.3, 54.0, 29.3, 20.7, 14.0. HRMS (ESI, *m/z*): calcd for C<sub>20</sub>H<sub>24</sub>N<sup>+</sup> [M+H]<sup>+</sup> 278.1903; found, 278.1907.

**(4Z)-2-ethyl-4-(phenylmethylidene)-1,2,3,4-tetrahydroisoquinoline (3b):**

(Reaction performed with 0.15 mmol (50 mg) scale of **1b**). Yellow color liquid: 33 mg, (87 %). <sup>1</sup>H-NMR (300 MHz, CDCl<sub>3</sub>) :δ 7.78-7.75 (m, 1H), 7.40-7.35 (m, 2H), 7.32-7.19 (m, 6H), 7.12-7.09 (m, 1H), 3.74 (s, 2H), 3.67 (s, 2H), 2.56 (q, *J* = 7.2 Hz, 2H), 1.09 (t, *J* = 7.2 Hz, 3H). <sup>13</sup>C{<sup>1</sup>H} NMR (75 MHz CDCl<sub>3</sub>) δ 137.4, 135.1, 133.4, 133.3, 129.4, 128.3, 127.5, 127.0, 126.8, 126.8, 123.4, 123.3, 55.9, 53.6, 51.3, 12.4. HRMS (ESI, *m/z*): calcd for C<sub>18</sub>H<sub>20</sub>N<sup>+</sup>. [M+H]<sup>+</sup> 250.1590; found, 250.1596.

**(4Z)-2-tert-butyl-4-(phenylmethylidene)-1,2,3,4-tetrahydroisoquinoline (3c):**

(Reaction performed with 0.14 mmol (50 mg) scale of **1c**). Yellow color liquid: 30 mg (78%).

<sup>1</sup>H-NMR (300 MHz, CDCl<sub>3</sub>): δ 7.77-7.72 (m, 1H), 7.41-7.28 (m, 5H), 7.22-7.16(m, 3H), 7.12-7.09 (m, 1H), 3.86 (s, 2H), 3.67 (s, 2H), 1.12(s, 9H). <sup>13</sup>C{<sup>1</sup>H} NMR (75 MHz CDCl<sub>3</sub>) δ 137.6, 136.5, 135.1, 133.6, 129.2, 128.2, 127.4, 127.1, 126.7, 126.5, 123.5, 122.6, 54.2, 49.8, 46.9, 25.9. HRMS (ESI, *m/z*): calcd for C<sub>20</sub>H<sub>24</sub>N<sup>+</sup> [M+H]<sup>+</sup> 278.1903; found, 278.1904.

**(4Z)-2-ethyl-4-[(4-methoxyphenyl)methylidene]-1,2,3,4-tetrahydroisoquinoline:(3d)**

(Reaction performed with 0.14 mmol (50 mg) scale of **1d**). Yellow color liquid: 33 mg, (86%)

. <sup>1</sup>H-NMR (300 MHz, CDCl<sub>3</sub>): δ 7.75-7.72 (m, 1H), 7.26-7.13 (m, 5H), 7.10-7.07 (m, 1H), 6.94-6.89 (m, 2H), 3.84 (s, 3H), 3.73 (s, 2H), 3.67(s, 2H), 2.56 (q, *J* = 7.5 Hz, 2H), 1.10 (t, *J* = 7.3 Hz, 3H). <sup>13</sup>C{<sup>1</sup>H} NMR (75 MHz CDCl<sub>3</sub>) δ 158.5, 134.8, 133.7, 131.8, 130.6, 130.0, 127.2, 127.0, 126.7, 123.2, 123.1, 113.7, 55.8, 55.3, 53.7, 51.3, 12.4. HRMS (ESI, *m/z*): calcd for C<sub>19</sub>H<sub>22</sub>NO<sup>+</sup> [M+H]<sup>+</sup> 280.1696; found 280.1702.

**(4Z)-2-butyl-4-[(4-methoxyphenyl)methylidene]-1,2,3,4-tetrahydroisoquinoline.:(3e).**

(Reaction performed with 0.13 mmol (50 mg) scale of **1e**). Yellow color liquid: 35 mg (89%).

<sup>1</sup>H-NMR (300 MHz, CDCl<sub>3</sub>): δ 7.75-7.72 (m, 1H), 7.25-7.14 (m, 5H), 7.09-7.06 (m, 1H), 6.94-6.90 (m, 2H), 3.84 (s, 3H), 3.73 (s, 2H), 3.66(s, 2H), 2.48 (t, *J* = 7.5 Hz, 2H), 1.53-1.40 (m, 2H) 1.33-1.26 (m, 2H) 0.88 (t, *J* = 7.2 Hz, 3H). <sup>13</sup>C{<sup>1</sup>H} NMR (75 MHz CDCl<sub>3</sub>) δ 158.4, 134.9, 133.7, 131.9, 130.6, 130.0, 127.2, 126.9, 126.7, 123.2, 123.0, 113.7, 57.4, 56.3, 55.3, 54.1, 29.3, 20.7, 14.0. HRMS (ESI, *m/z*): calcd for C<sub>21</sub>H<sub>26</sub>NO<sup>+</sup> [M+H]<sup>+</sup> 308.2009; found 308.2003.

**(4Z)-2-tert-butyl-4-[(4-methoxyphenyl)methylidene]-1,2,3,4-tetrahydroIsoquinoline (3f):**

(Reaction performed with 0.11 mmol (40 mg) scale of **1f**). Yellow color liquid: 30 mg (85%).  
<sup>1</sup>H-NMR (300 MHz, CDCl<sub>3</sub>): δ 7.73-7.70 (m, 1H), 7.26-7.17 (m, 4H), 7.09 (br s, 2H), 6.91 (d, *J* = 9 Hz, 2H), 3.84-3.85 (two singlets merged, 5H), 3.67 (s, 2H), 1.13 (s, 9H). <sup>13</sup>C{<sup>1</sup>H} NMR (75 MHz, CDCl<sub>3</sub>) δ 158.3, 136.3, 133.8, 133.7, 130.5, 130.2, 127.1, 127.0, 126.5, 123.3, 122.3, 113.7, 55.3, 54.2, 49.8, 46.9, 25.9 HRMS (ESI, *m/z*): calcd for C<sub>21</sub>H<sub>26</sub>NO<sup>+</sup> [M+H]<sup>+</sup> 308.2009; found 308.2004.

**(4Z)-2-benzyl-4-[(4-methoxyphenyl)methylidene]-1,2,3,4-tetrahydroisoquinoline (3g):**  
(Reaction performed with 0.25 mmol (120 mg) scale of **1g**). White color solid: 68 mg (78%),  
MP = 85 °C. <sup>1</sup>H-NMR (300 MHz, CDCl<sub>3</sub>): δ 7.75 (d, *J* = 7.5 Hz, 1H), 7.29-7.16 (m, 10H),  
7.00 (d, *J* = 7.5 Hz, 1H), 6.86 (d, *J* = 8.7 Hz, 2H), 3.82 (s, 3H), 3.74 (s, 2H), 3.71 (s, 2H),  
3.65 (s, 2H). <sup>13</sup>C{<sup>1</sup>H} NMR (75 MHz, CDCl<sub>3</sub>) δ 158.4, 137.9, 134.7, 133.7, 131.7, 130.6,  
129.9, 129.3, 128.3, 127.2, 127.2, 127.0, 126.7, 123.3, 123.2, 113.7, 61.7, 55.7, 55.3, 53.9.  
HRMS (ESI, *m/z*): calcd for C<sub>24</sub>H<sub>24</sub>ON [M+H]<sup>+</sup> 342.1852; found, 342.1843.

**(4Z)-2-[(4-methoxyphenyl)methyl]-4-(phenylmethylidene)-1,2,3,4-tetrahydroisoquinoline (3h):**  
(Reaction performed with 0.42 mmol (200 mg) scale of **1h**). Yellow color liquid: 114 mg  
(78%). <sup>1</sup>H-NMR (300 MHz, CDCl<sub>3</sub>): δ 7.77 (d, *J* = 7.5 Hz, 1H), 7.35-7.30 (m, 2H), 7.25-7.18  
(m, 8H), 7.02 (d, *J* = 6.9 Hz, 1H), 6.79 (d, *J* = 8.4 Hz, 2H),  
3.77 (s, 3H), 3.70 (s, 2H merged with the 3.69 peak), 3.69 (s, 2H), 3.58 (s, 2H). <sup>13</sup>C{<sup>1</sup>H}  
NMR (75 MHz, CDCl<sub>3</sub>) δ 158.8, 137.4, 135.0, 133.5, 133.2, 130.6, 129.8, 129.4, 128.3,  
127.6, 127.1, 126.8, 123.6, 123.3, 113.7, 60.9, 55.6, 55.3, 53.5. HRMS (ESI, *m/z*): calcd for  
C<sub>24</sub>H<sub>24</sub>ON [M+H]<sup>+</sup> 342.1852; found, 342.1851.

**(4Z)-2-(4-methylphenyl)-4-(phenylmethylidene)-1,2,3,4-tetrahydroisoquinoline (3i):**  
(Reaction performed with 0.25 mmol (100 mg) scale of **1i**). Yellow color liquid: 57 mg  
(81%). (As per starting material recovery). <sup>1</sup>H-NMR (300 MHz, CDCl<sub>3</sub>): δ 7.76-7.73 (m, 1H),  
7.43-7.38 (m, 2H), 7.33-7.16 (m, 7H), 7.00 (d, *J* = 8.4 Hz, 2H), 6.77 (d, *J* = 8.7 Hz, 2H), 4.45

(s, 2H), 4.39 (s, 2H), 2.22 (s, 3H), .  $^{13}\text{C}\{1\text{H}\}$  NMR (75 MHz,  $\text{CDCl}_3$ )  $\delta$  148.0, 137.2, 134.7, 133.8, 132.7, 129.7, 129.3, 129.1, 128.4, 127.7, 127.1, 126.9, 126.7, 124.2, 123.8, 116.8, 52.9, 50.6, 20.4. HRMS (ESI,  $m/z$ ): calcd for  $\text{C}_{23}\text{H}_{21}\text{N}$   $[\text{M}]^+$  311.1674; found, 311.1679.

**4-methylidene-2-(4-methylphenyl)-1,2,3,4-tetrahydroisoquinoline (3j):** (Reaction performed with 0.094 mmol (30 mg) scale of **1j**). Yellow color liquid: 18 mg (80%).  $^1\text{H}$ -NMR (300 MHz,  $\text{CDCl}_3$ ) .  $\delta$  7.69-7.65 (m, 1H), 7.24-7.20 (m, 2H), 7.18-7.14 (m, 1H), 7.07 (d,  $J = 8.1$  Hz, 2H), 6.93 (d,  $J = 8.7$  Hz, 2H), 5.63 (s, 1H), 5.10 (s, 1H), 4.42 (s, 2H), 4.10 (s, 2H), 2.26 (s, 3H).  $^{13}\text{C}\{1\text{H}\}$  NMR (75 MHz,  $\text{CDCl}_3$ )  $\delta$  148.2, 138.9, 134.4, 132.5, 129.7, 129.3, 128.0, 126.8, 126.7, 123.8, 117.0, 108.4, 55.4, 53.3, 20.4. HRMS (ESI,  $m/z$ ): calcd for  $\text{C}_{17}\text{H}_{16}\text{N}$   $[\text{M}-\text{H}]^+$  234.1277; found, 234.1278.

**4-methylidene-2-(prop-2-en-1-yl)-1,2,3,4-tetrahydroisoquinoline (3k):**

(Reaction performed with 0.19 mmol (50 mg) scale of **1k**). Yellow color liquid: 26 mg (75%).  $^1\text{H}$ -NMR (300 MHz,  $\text{CDCl}_3$ ):  $\delta$  7.69-7.66 (m, 1H), 7.21-7.18 (m, 2H), 7.08-7.05 (m, 1H), 6.01-5.88 (m, 1H), 5.61, (s, 1H), 5.28-5.19 (m, 2H), 5.01 (s, 1H), 3.73 (s, 2H), 3.39 (s, 2H), 3.17 (d,  $J = 6.6$  Hz, 2H) ):  $^{13}\text{C}\{1\text{H}\}$  NMR 75 MHz,  $\text{CDCl}_3$ )  $\delta$  139.3, 135.1, 134.6, 132.2, 127.9, 126.9, 126.6, 123.4, 118.2, 108.0, 60.3, 58.0 , 56.4. HRMS (ESI,  $m/z$ ): calcd for  $\text{C}_{13}\text{H}_{16}\text{N}$   $[\text{M}+\text{H}]^+$  186.1277; found, 186.1279.

**4-methylidene-2-octyl-1,2,3,4-tetrahydroisoquinoline (3l):** (Reaction performed with 0.30 mmol (100 mg) scale of **1l**). Pale yellow color liquid: 60 mg (79 %).  $^1\text{H}$ -NMR (300 MHz,  $\text{CDCl}_3$ ):  $\delta$  7.68-7.64 (m, 1H), 7.21-7.17 (m , 2H) 7.08-7.05 (m, 1H) 5.60 ,(s, 1H), 5.01 (s, 1H) 3.72 (s, 2H), 3.38 (s, 2H), 2.49 (t,  $J = 7.5$  Hz, 2H), 1.61- 1.53 (m, 2H), 1.31-1.27 (m, 10H) 0.88( t,  $J = 6$  Hz, 3H).  $^{13}\text{C}\{1\text{H}\}$  NMR (75 MHz,  $\text{CDCl}_3$ )  $\delta$  139.5, 134.9, 132.2, 127.8, 126.9, 126.5, 123.4, 107.8, 58.5, 57.4, 56.8, 31.9, 29.6, 29.3, 27.6, 27.3, 22.7, 14.1. HRMS (ESI,  $m/z$ ): calcd for  $\text{C}_{18}\text{H}_{28}\text{N}$   $[\text{M}+\text{H}]^+$  258.2216; found, 258.2209.

**4-methylidene-2[(2E)-3-phenylprop-2-en-1-yl]-1,2,3,4-tetrahydroisoquinoline (3m):**

(Reaction performed with 0.15 mmol (50 mg) scale of **1m**). Yellow color liquid 31 mg (79 %).

<sup>1</sup>H-NMR (300 MHz, CDCl<sub>3</sub>): δ 7.70-7.67 (m, 1H), 7.42-7.40 (m, 2H), 7.32 (t, *J* = 6.9 Hz, 2H), 7.27-7.24 (m, 1H), 7.22-7.19 (m, 2H), 7.08-7.05 (m, 1H), 6.58 (d, *J* = 15.9 Hz, 1H), 6.35 (dt, *J* = 15.9 Hz, 6.6 Hz, 1H), 5.63 (s, 1H), 5.02 (s, 1H), 3.79 (s, 2H), 3.45 (s, 2H), 3.34 (d, *J* = 6.6 Hz, 2H). <sup>13</sup>C{<sup>1</sup>H} NMR (75 MHz, CDCl<sub>3</sub>) δ 139.2, 136.9, 134.5, 133.1, 132.2, 128.6, 127.9, 127.6, 126.9, 126.6, 126.4, 123.5, 108.1, 59.6, 58.2, 56.5. HRMS (ESI, *m/z*): calcd for C<sub>19</sub>H<sub>20</sub>N [M+H]<sup>+</sup> 262.1590; found, 262.1583.

**2-[(2E)-3-(4-methoxyphenyl)prop-2-en-1-yl]-4-methylidene-1,2,3,4-**

**tetrahydroisoquinoline (3n):** (Reaction performed with 0.17 mmol (70 mg) scale of **1n**). Pale

yellow color solid: 38 mg (79%). MP = 105-110 °C. <sup>1</sup>H-NMR (300 MHz, CDCl<sub>3</sub>): δ 7.70-7.67 (m, 1H), 7.34 (d, *J* = 8.7 Hz, 2H), 7.22-7.18 (m, 2H), 7.08-7.05 (m, 1H), 6.87 (d, *J* = 8.7 Hz, 2H), 6.52 (d, *J* = 15.9 Hz, 1H), 6.20 (dt, *J* = 15.9 Hz, 6.6 Hz, 1H), 5.63 (s, 1H), 5.02 (s, 1H), 3.82 (s, 3H), 3.78 (s, 2H), 3.44 (s, 2H), 3.31 (d, *J* = 6.6 Hz, 2H). <sup>13</sup>C{<sup>1</sup>H} NMR (75 MHz, CDCl<sub>3</sub>) δ 159.2, 139.3, 134.7, 132.6, 132.2, 129.8, 127.9, 127.6, 126.9, 126.6, 124.4, 123.5, 114.0, 108.0, 59.8, 58.2, 56.5, 55.3. HRMS (ESI, *m/z*): calcd for C<sub>20</sub>H<sub>22</sub>NO [M+H]<sup>+</sup> 292.1696; found, 292.1688.

**(4Z)-2-(2-methylbut-2-en-1-yl)-4-(phenylmethylidene)-1,2,3,4-tetrahydroisoquinoline**

**(3o):** (Reaction performed with 0.22 mmol (80 mg) scale of **1o**). Yellow color liquid: 43 mg

(70%). <sup>1</sup>H-NMR (300 MHz, CDCl<sub>3</sub>): δ 7.79-7.74 (m, 1H), 7.39-7.33 (m, 3H), 7.30-7.19 (m, 5H), 7.10-7.07 (m, 1H), 5.36-5.29 (m, 1H), 3.66 (s, 2H), 3.61 (s, 2H), 2.97 (s, 2H), 1.64 (s, 3H), 1.51 (d, *J* = 7.8 Hz, 3H). <sup>13</sup>C{<sup>1</sup>H} NMR (75 MHz, CDCl<sub>3</sub>) δ 137.5, 135.3, 133.6, 133.4, 132.7, 129.3, 128.1, 127.5, 127.0, 126.7, 126.6, 123.4, 123.3, 122.7, 66.0, 55.9, 53.3, 14.7, 13.2. HRMS (ESI, *m/z*): calcd for C<sub>21</sub>H<sub>22</sub>N [M+H]<sup>+</sup> 288.1746; found, 288.1740.

### **2-[(2E)-2-methylbut-2-en-1-yl]-4-methylidene-1,2,3,4-tetrahydroisoquinoline:(3p)**

(Reaction performed with 0.18 mmol (60 mg) scale of 1p). Yellow color liquid: 29 mg (77%).

<sup>1</sup>H-NMR (300 MHz, CDCl<sub>3</sub>): δ 7.69-7.66 (m, 1H), 7.20-7.17(m, 2H), 7.07-7.04 (m, 1H), 5.60 (s, 1H), 5.44-5.39 (m, 1H), 4.99 (s, 1H), 3.63 (s, 2H), 3.29 (s, 2H), 3.00 (s, 2H) , 1.68 (s, 3H) ,1.65(d, *J* =6.6 Hz, 3H). <sup>13</sup>C{<sup>1</sup>H} NMR (75 MHz, CDCl<sub>3</sub>): δ 139.6, 135.1, 132.9, 132.3, 127.8, 126.9, 126.4, 123.4, 122.4, 107.6, 66.0, 57.9, 56.4, 14.7, 13.3. HRMS (ESI, *m/z*): calcd for C<sub>15</sub>H<sub>20</sub>N [M+H]<sup>+</sup> 214.1590; found, 214.1586.

### **4-ethenyl-4methyl-2-(4-methylphenyl)-1, 2, 3, 4-tetrahydroisoquinoline :( 3q)**

(Reaction performed with 0.14 mmol (50 mg) scale of 1q). Yellow color liquid: 30 mg (78%). <sup>1</sup>H-NMR (300 MHz, CDCl<sub>3</sub>): δ 7.27-7.23 (m, 1H), 7.22-7.14 (m, 3H), 7.11 (d, *J* = 8.1 Hz, 2H ), 6.89 (d, *J* = 8.7 Hz, 2H ), 6.05 (dd, *J* = 17.1, 10.8 Hz, 1H), 5.16 (brs, 1H), 5.12 (dd, *J* =7.2, 1.2 Hz, 1H), 4.34 (dd, *J* = 20.7, 15 Hz ,2H), 3.30 (dd, *J* = 19.8, 12.3 Hz, 2H), 2.28 (s, 3H), 1.49 (s, 3H). <sup>13</sup>C{<sup>1</sup>H} NMR (75 MHz, CDCl<sub>3</sub>) δ 148.7, 145.0, 141.1, 133.8, 129.6, 128.1, 127.3, 126.52, 126.50, 126.2, 115.2, 113.5, 59.4, 51.4, 42.5, 24.7, 20.4. HRMS calcd for (ESI, *m/z*): calcd for C<sub>19</sub>H<sub>20</sub>N [M-H]<sup>+</sup> 262.1590 found, 262.1591

### **3S<sub>1</sub> and 3S<sub>2</sub> formed as 1:1 mixture**

#### **Procedure for the gram scale preparation of compound: 3c:**

Compound 1c (10 mmol, 3.58 g, 1.0 equiv.), Cs<sub>2</sub>CO<sub>3</sub> (20 mmol, 6.4 g, 2.0 equiv.) and toluene (150 mL) were taken in a 500 mL two neck round bottomed flask fitted with reflux condenser. Then reaction mass was purged with nitrogen before and after the addition of Pd(OAc)<sub>2</sub> (1.0 mmol, 224 mg ) and PPh<sub>3</sub> (2.0 mmol, 524 mg). The reaction mass was stirred for 20 h at 110 °C in an oil bath. After complete consumption of the starting material, the reaction mixture was cooled to room temperature. Then the reaction vessel was opened and the contents were poured into a separating funnel (500 ml). Water (50 mL) and ethyl acetate



(100 mL) were added into the separating funnel, extracted and the organic layer was isolated. The aqueous layer was further extracted with ethyl acetate (2×50 mL. ) and the combined organic extracts were washed with brine solution (1 × 100 mL). Finally, the organic layer was dried over anhydrous Na<sub>2</sub>SO<sub>4</sub>, filtered and concentrated under reduced pressure. The obtained crude mixture was purified on neutral alumina column with 2% ethyl acetate in hexanes to afford the pure product. 2.05 g of pure compound of **3c** was isolated with (76% yield).

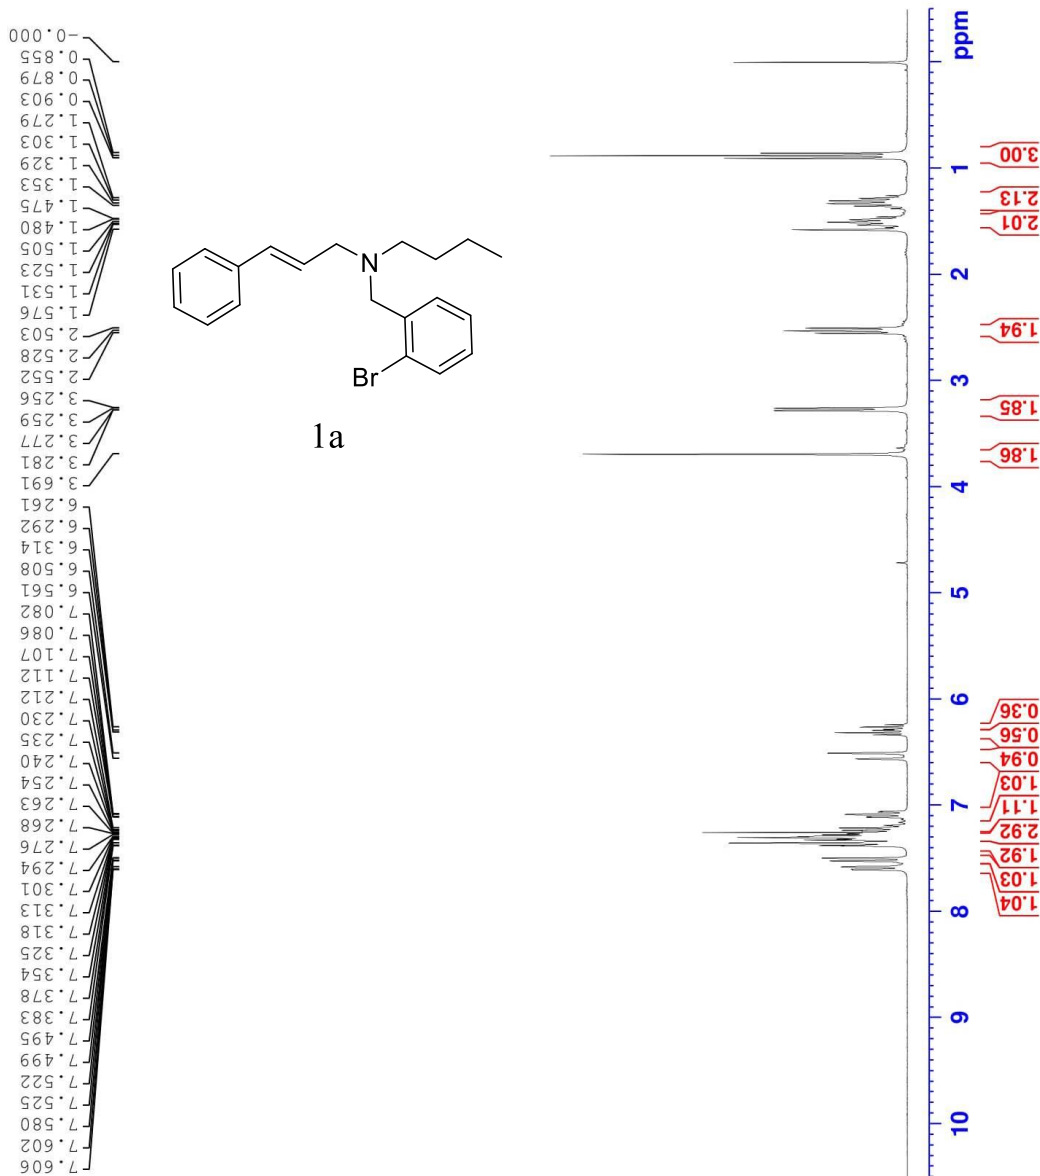

Current Data Parameters  
 NAME 3422B  
 EXPNO 1  
 PROCNO 1

F2 - Acquisition Parameters  
 Date\_ 20180307  
 Time 18.02  
 INSTRUM spect  
 PROBHD 5 mm BBO BB-1H  
 PULPROG zg30  
 TD 65536  
 SOLVENT CDCl3  
 NS 16  
 DS 2  
 SWH 6009.615 Hz  
 FIDRES 0.091699 Hz  
 AQ 5.4525952 sec  
 RG 161  
 DW 83.200 usec  
 DE 6.50 usec  
 TE 298.0 K  
 D1 1.00000000 sec  
 TDO 1

===== CHANNEL f1 =====  
 SFO1 300.1318534 MHz  
 NUC1 1H  
 P1 13.00 usec  
 PLW1 10.69999981 W

F2 - Processing parameters  
 SI 65536  
 SF 300.1300085 MHz  
 EM  
 WDW 0  
 SSB 0  
 LB 0.30 Hz  
 GB 0  
 PC 1.00

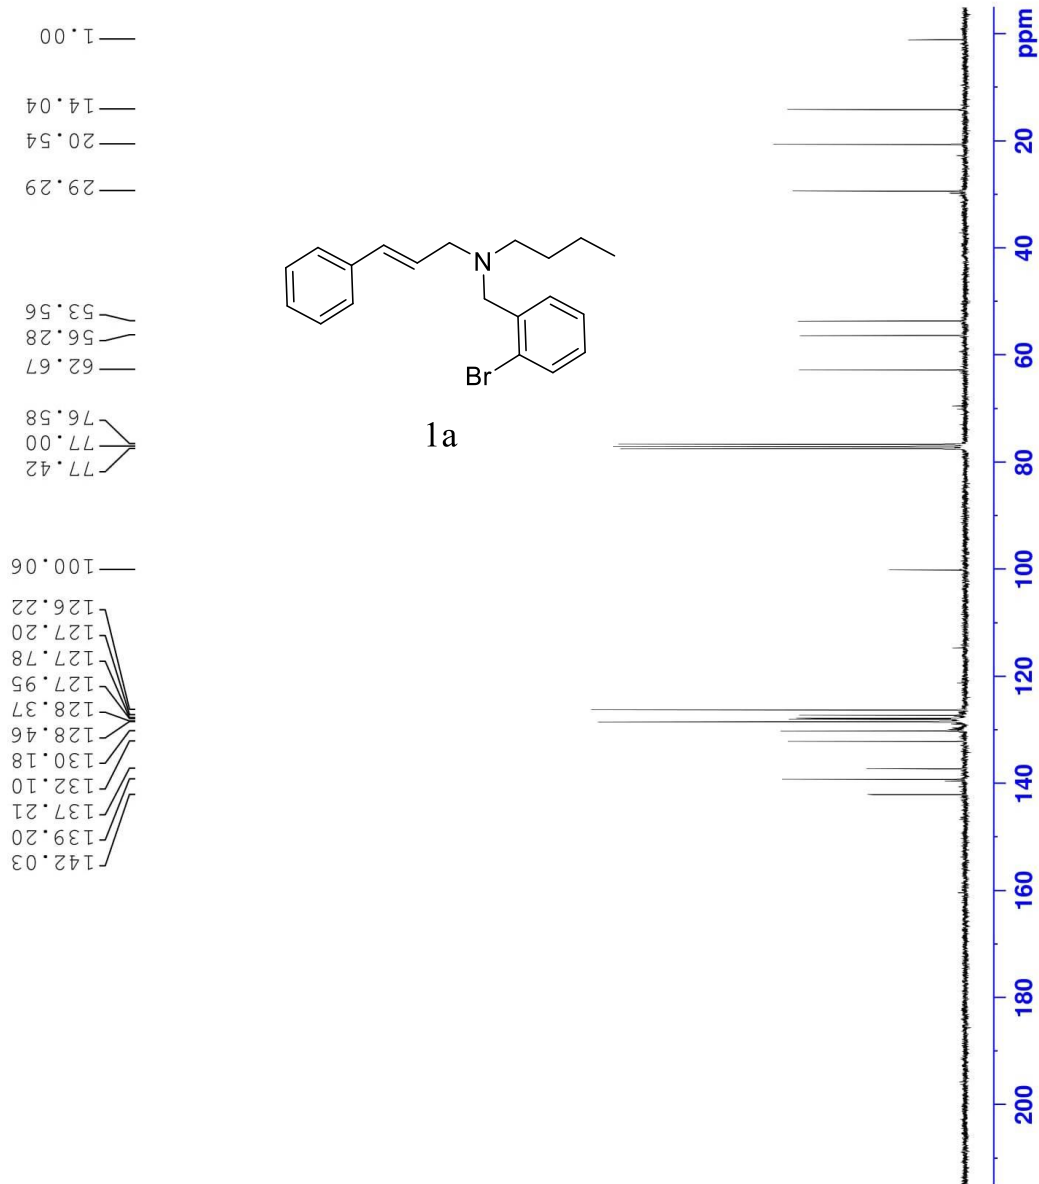

Current Data Parameters  
 NAME C2552F3  
 EXPNO 1  
 PROCNO 1

F2 - Acquisition Parameters  
 Date\_ 20190108  
 Time 12.45  
 INSTRUM spect  
 PROBHD 5 mm BBO BB-LH  
 PULPROG zgpg30  
 TD 65536  
 SOLVENT CDCl3  
 NS 512  
 DS 4  
 SWH 18028.846 Hz  
 FIDRES 0.275098 Hz  
 AQ 1.8175317 sec  
 RG 812  
 DW 27.733 usec  
 DE 6.50 usec  
 TE 300.0 K  
 D1 2.0000000 sec  
 D11 0.0300000 sec  
 TD0 1

==== CHANNEL f1 =====  
 SFO1 75.4752949 MHz  
 NUC1 13C  
 P1 9.47 usec  
 PLW1 38.0000000 W

==== CHANNEL f2 =====  
 SFO2 300.1312005 MHz  
 NUC2 1H  
 CPDPRG12 waltz16  
 FCPD2 90.00 usec  
 PLW2 10.6999981 W  
 PLW12 0.22325000 W  
 PLW13 0.11229000 W

F2 - Processing parameters  
 SI 32768  
 SF 75.4677561 MHz  
 EM  
 SSB 0  
 LB 1.00 Hz  
 GB 0  
 PC 1.40

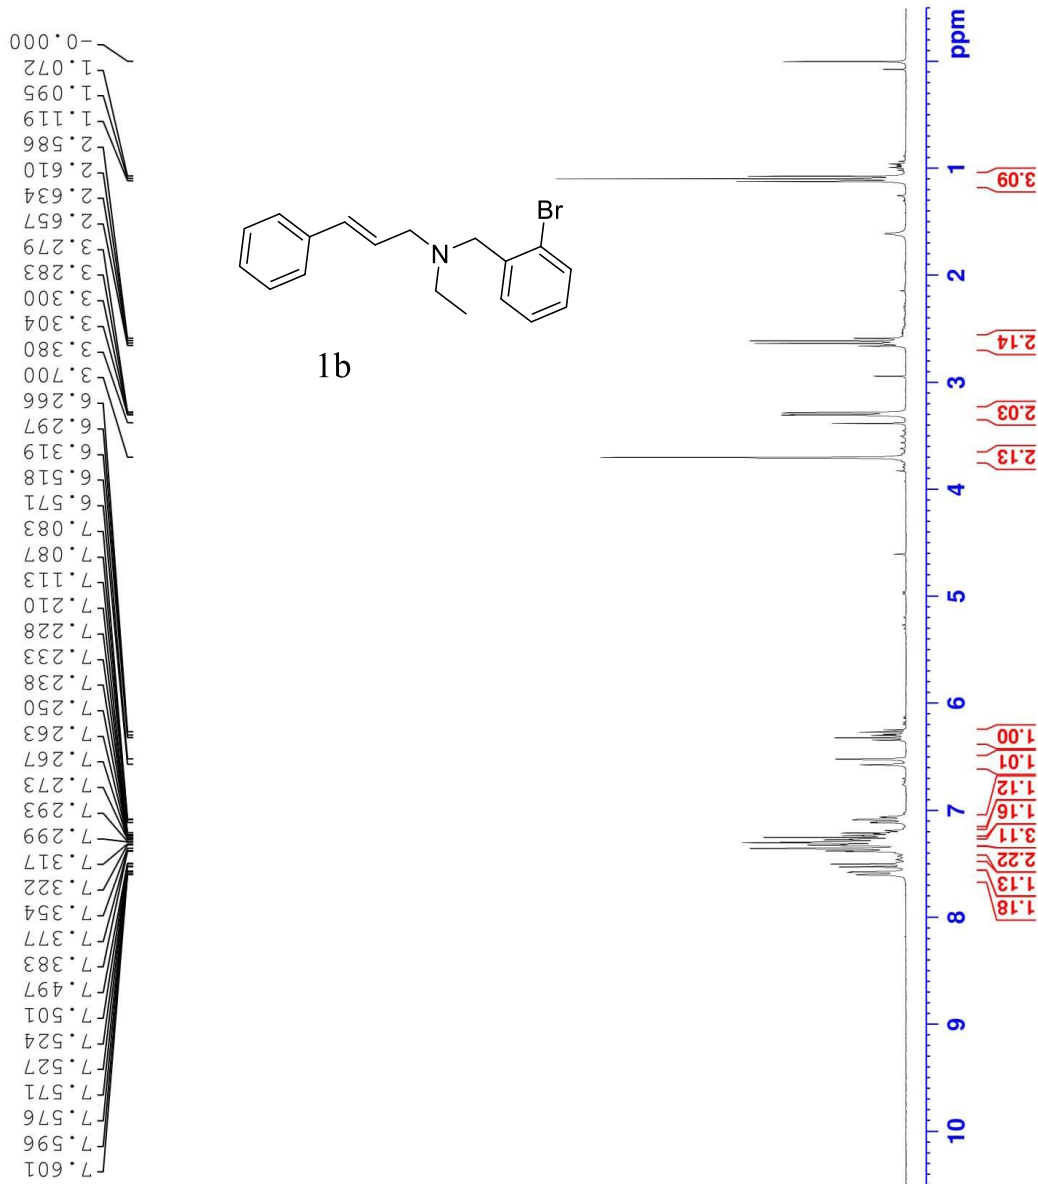

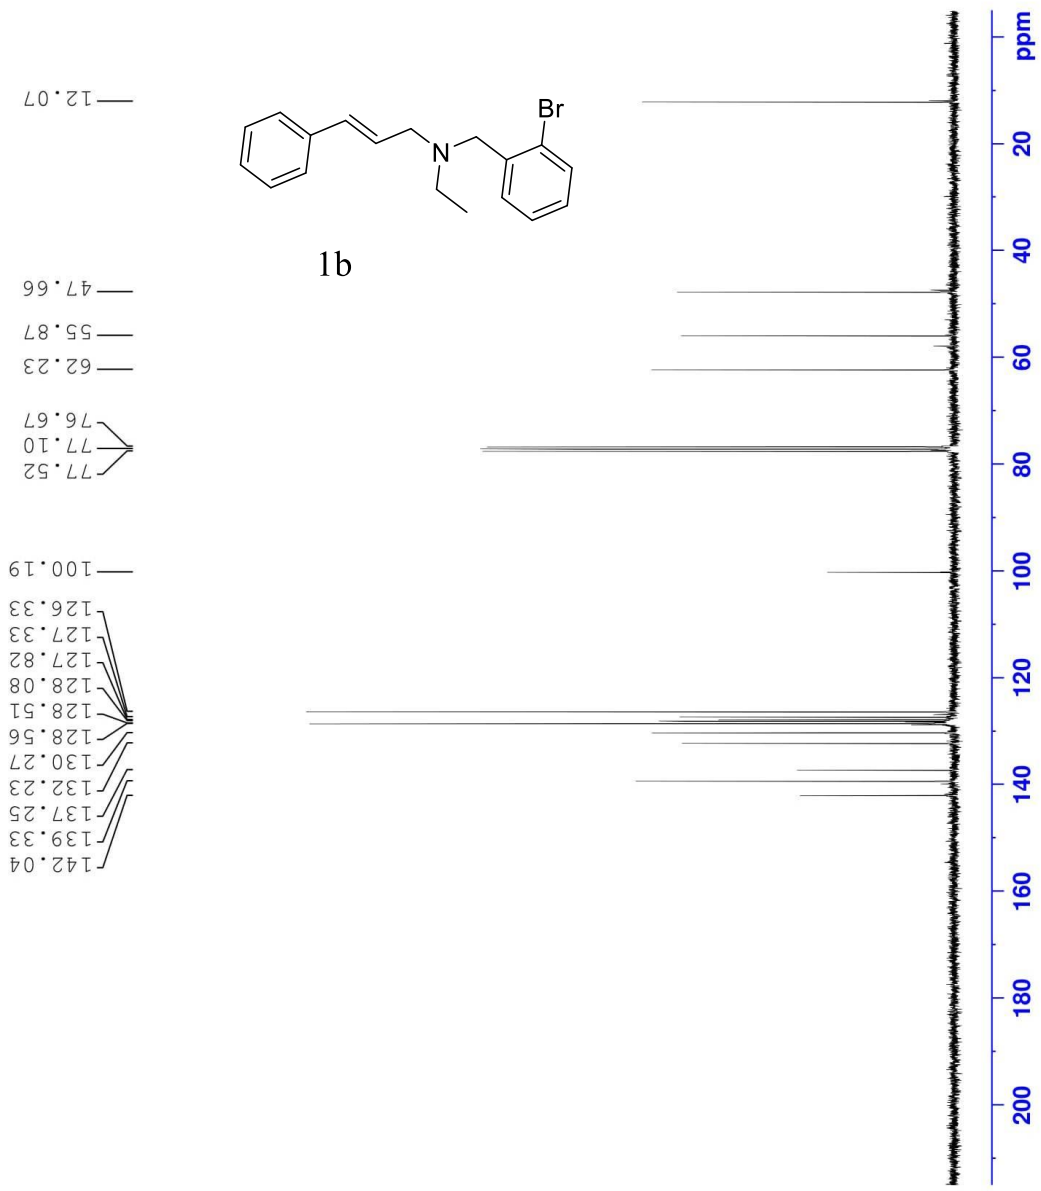

```

Current Data Parameters
NAME          3788J
EXPNO         1
PROCNO        1

F2 - Acquisition Parameters
Date_         20180604
Time          15.59
INSTRUM       spect
PROBHD        5 mm BBO BB-1H
PULPROG       zgpg30
TD            65536
SOLVENT       CDCl3
NS            300
DS            4
SWH           18028.846 Hz
FIDRES        0.275098 Hz
AQ            1.8175317 sec
RG            812
DW            27.733 usec
DE            6.50 usec
TE            300.0 K
D1            2.00000000 sec
D11           0.03000000 sec
TD0           1

===== CHANNEL f1 =====
SFO1          75.4752949 MHz
NUC1          13C
P1            9.47 usec
PLW1         38.00000000 W

===== CHANNEL f2 =====
SFO2          300.1312005 MHz
NUC2          1H
CFPRG[2]     waltz16
PCPD2        90.00 usec
PLW2         10.69999981 W
PLW12        0.22325000 W
PLW13        0.11229000 W

F2 - Processing parameters
SI            32768
SF            75.4677485 MHz
WDW           EM
SSB           0
LB            1.00 Hz
GB            0
PC            1.40
  
```

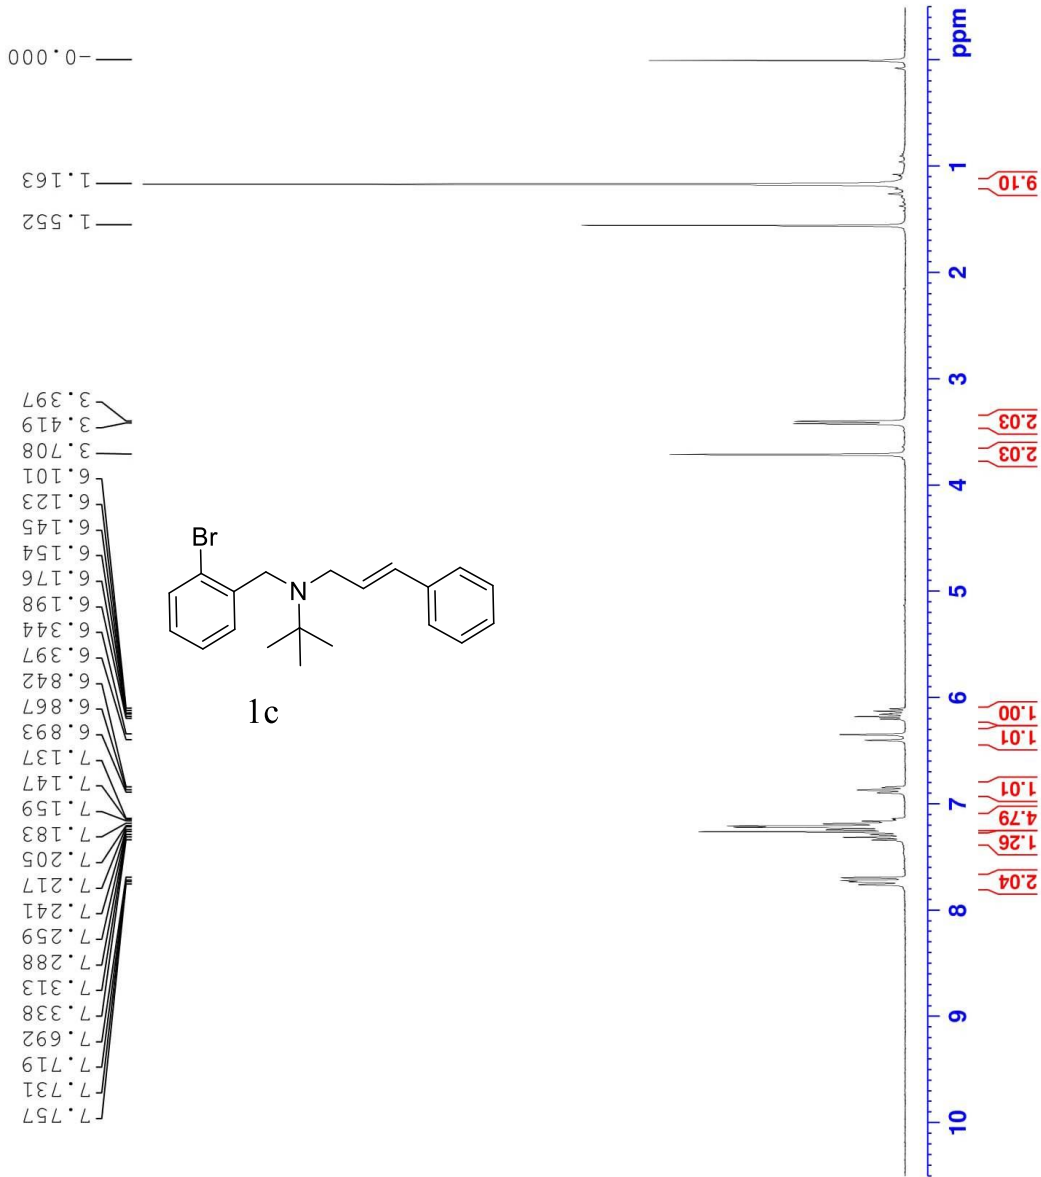

Current Data Parameters  
 NAME H2552C13  
 EXPNO 1  
 PROCNO 1

F2 - Acquisition Parameters  
 Date\_ 20180818  
 Time 16.46  
 INSTRUM spect  
 PROBHD 5 mm BBO BB-IH  
 PULPROG zg30  
 TD 65536  
 SOLVENT CDCl3  
 NS 16  
 DS 2  
 SWH 6009.615 Hz  
 FIDRES 0.091699 Hz  
 AQ 5.4525952 sec  
 RG 362  
 DW 83.200 usec  
 DE 6.50 usec  
 TE 298.0 K  
 D1 1.00000000 sec  
 TD0 1

===== CHANNEL f1 =====  
 SFO1 300.1318534 MHz  
 NUC1 1H  
 P1 13.00 usec  
 PLW1 10.69999981 W

F2 - Processing parameters  
 SI 65536  
 SF 300.1300070 MHz  
 WDW EM  
 SSB 0  
 LB 0.30 Hz  
 GB 0  
 PC 1.00

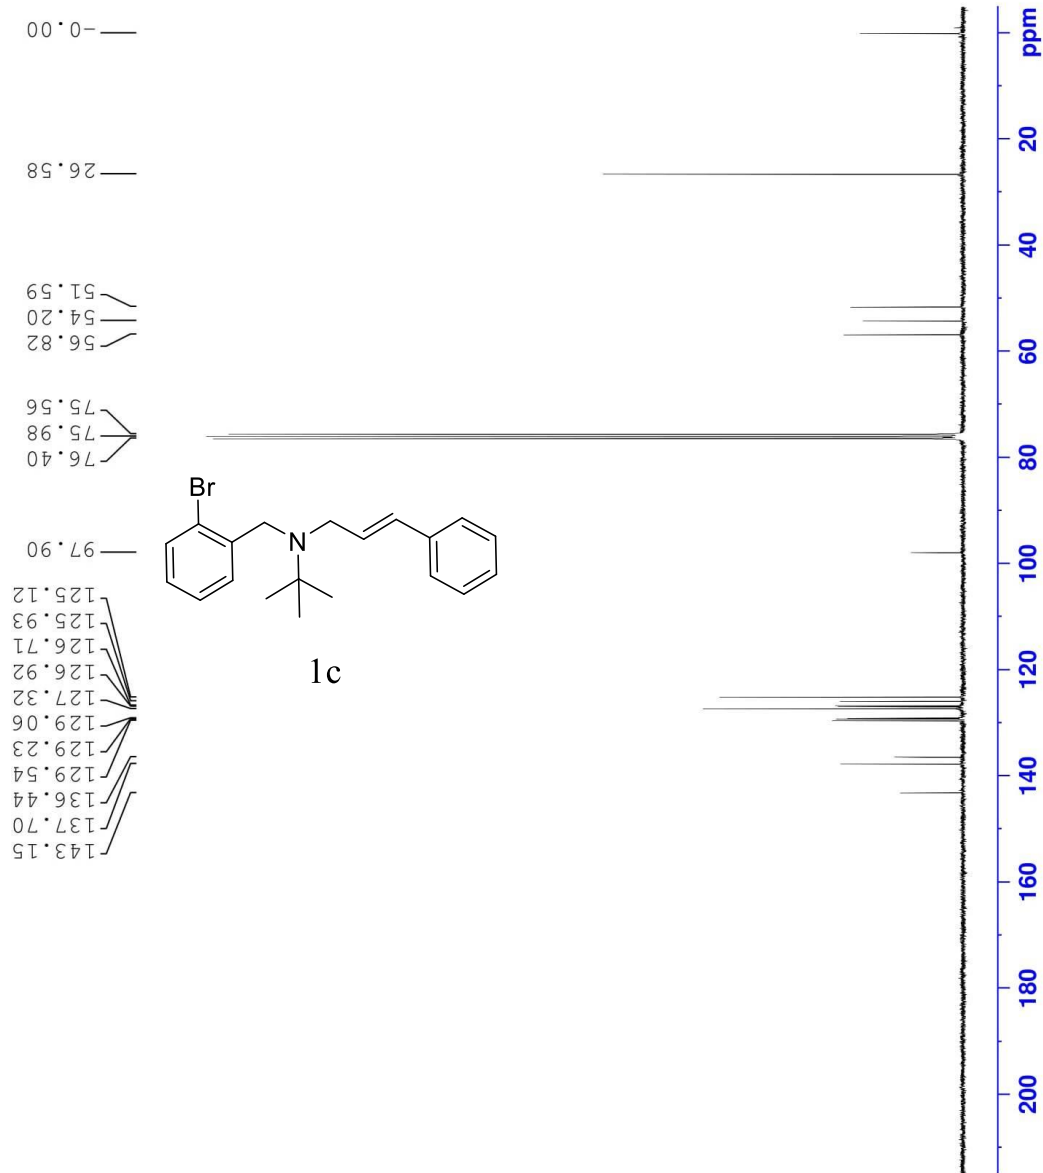

Current Data Parameters  
 NAME C2552F4  
 EXPNO 1  
 PROCNO 1

F2 - Acquisition Parameters

Date\_ 20190109  
 Time 19.49  
 INSTRUM spect  
 PROBHD 5 mm BBO BB-IH  
 PULPROG zgpg30  
 TD 65536  
 SOLVENT CDCl3  
 NS 2048  
 DS 4  
 SWH 18028.846 Hz  
 FIDRES 0.275098 Hz  
 AQ 1.8175317 sec  
 RG 812  
 DW 27.733 usec  
 DE 6.50 usec  
 TE 300.0 K  
 D1 2.00000000 sec  
 D11 0.03000000 sec  
 TDO 1

==== CHANNEL f1 =====  
 SFO1 75.4752949 MHz  
 NUC1 13C  
 P1 9.47 usec  
 PLW1 38.00000000 W

==== CHANNEL f2 =====  
 SFO2 300.1312005 MHz  
 NUC2 1H  
 CFPRG12 waitz16  
 PCPD2 90.00 usec  
 PLW2 10.69999981 W  
 PLW12 0.22325000 W  
 PLW13 0.11229000 W

F2 - Processing parameters  
 SI 32768  
 SF 75.4678284 MHz  
 WDW EM  
 SSB 0  
 LB 1.00 Hz  
 GB 0  
 PC 1.40

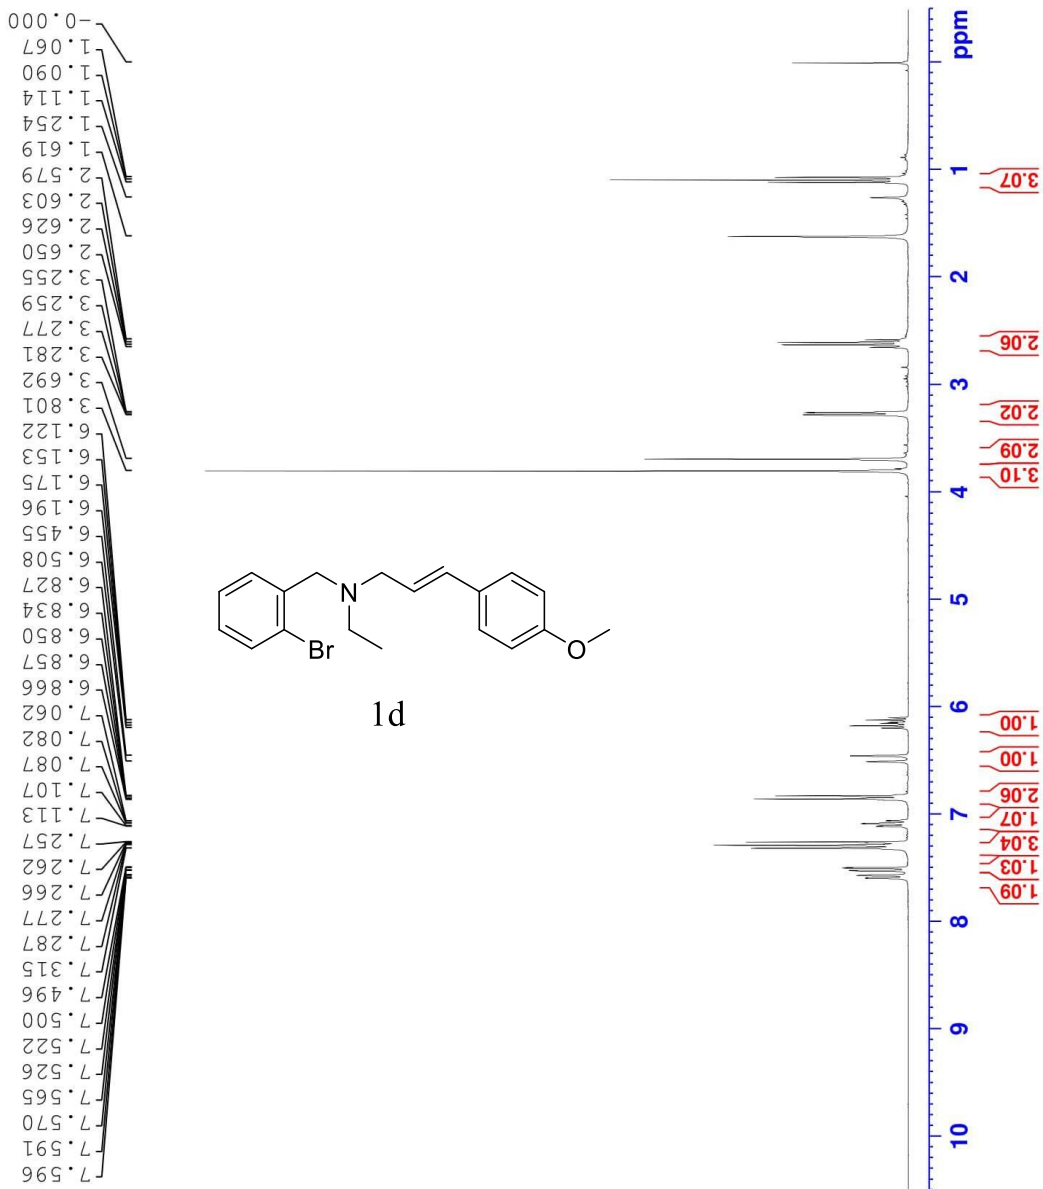



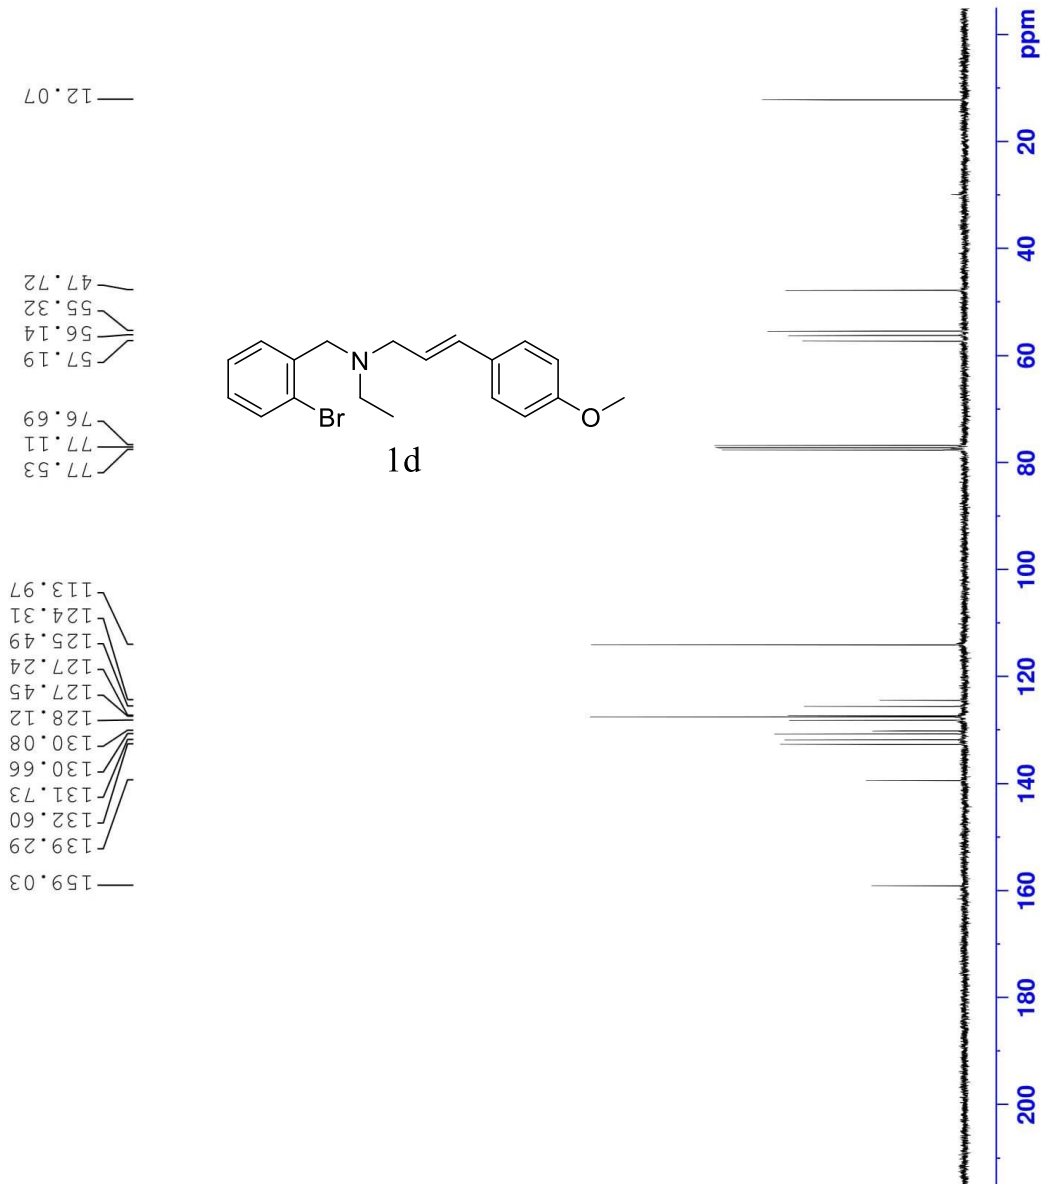

```

Current Data Parameters
NAME      3561KL_C13
EXPNO    1
PROCNO   1

F2 - Acquisition Parameters
Date_    20180405
Time     13.44
INSTRUM  spect
PROBHD   5 mm BBO BB-IH
PULPROG  zgpg30
TD       65536
SOLVENT  CDCl3
NS       128
DS       4
SWH      18028.846 Hz
FIDRES   0.275098 Hz
AQ       1.8175317 sec
RG       812
DW       27.733 usec
DE       6.50 usec
TE       300.0 K
D1       2.0000000 sec
DL1      0.0300000 sec
TDD      1

===== CHANNEL f1 =====
SFO1    75.4752949 MHz
NUC1    13C
P1      9.47 usec
PLW1    38.0000000 W

===== CHANNEL f2 =====
SFO2    300.1312005 MHz
NUC2    1H
CFPRG[2] waltz16
PCPD2   90.00 usec
PLW2    10.69999981 W
PLW12   0.2225000 W
PLW13   0.11229000 W

F2 - Processing parameters
SI      32768
SF      75.4677485 MHz
WDW     EM
SSB     0
LB      1.00 Hz
GB      0
PC      1.40

```

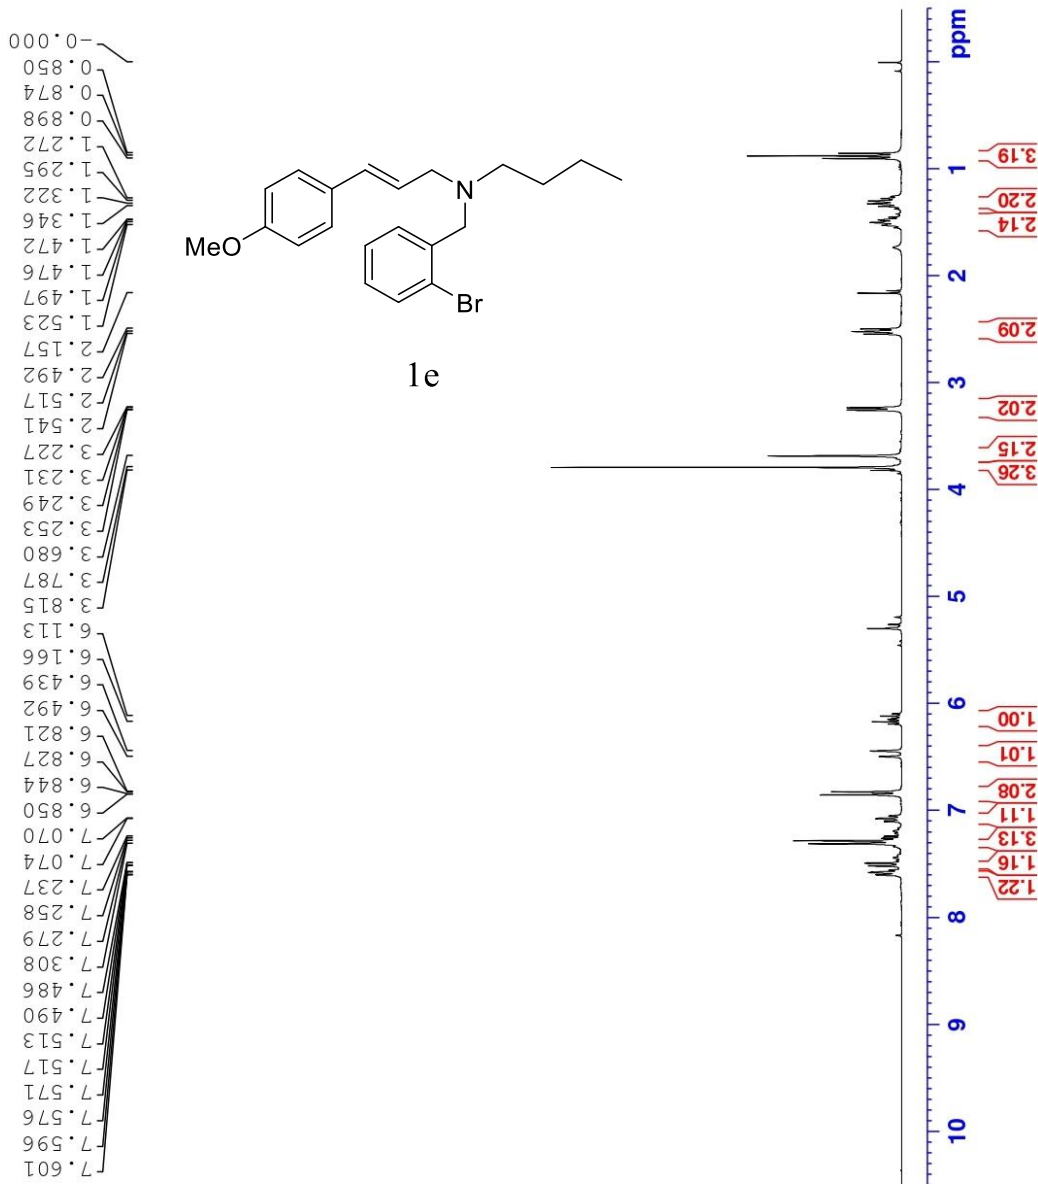

```

Current Data Parameters
NAME      3581F-R
EXPNO    1
PROCNO   1

F2 - Acquisition Parameters
Date_    20190227
Time     15.42
INSTRUM spect
PROBHD   5 mm BBO BB-1H
PULPROG zg30
TD       65536
SOLVENT  CDC13
NS       16
DS       2
SWH      6009.615 Hz
FIDRES   0.091699 Hz
AQ       5.4525952 sec
RG       64
DW       83.200 usec
DE       6.50 usec
TE       298.0 K
D1       1.00000000 sec
TD0      1

===== CHANNEL f1 =====
SFO1    300.1318534 MHz
NUC1    1H
P1      13.00 usec
PLW1    10.69999981 W

F2 - Processing parameters
SI      65536
SF      300.1300136 MHz
WDW     EM
SSB     0
LB      0.30 Hz
GB      0
PC      1.00
  
```

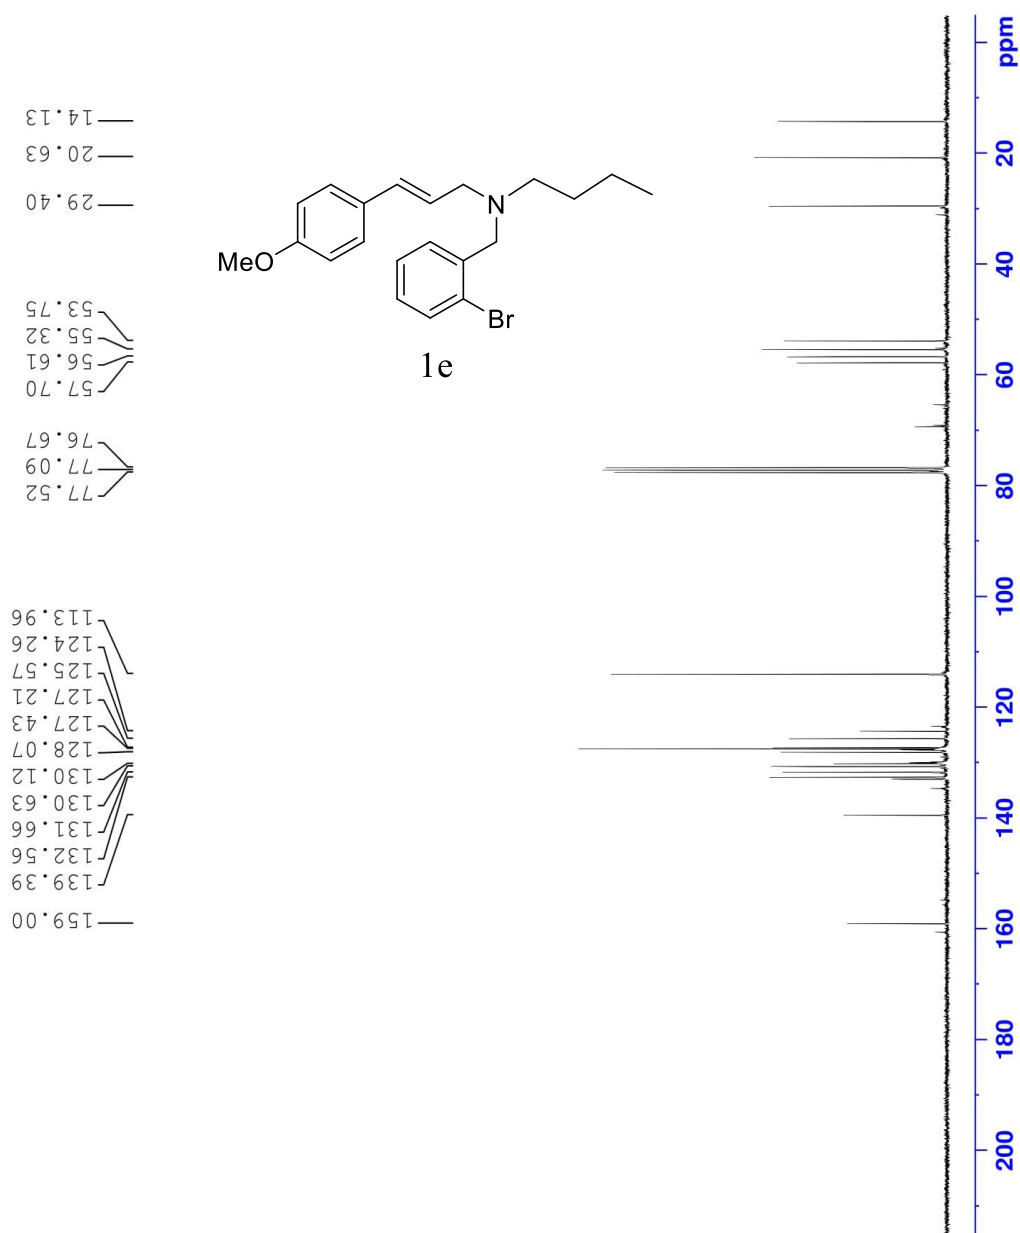

```

Current Data Parameters
NAME      3581F-R
EXPNO    1
PROCNO   1

F2 - Acquisition Parameters
Date_    20190304
Time     16.23
INSTRUM spect
PROBHD   5 mm BBO BB-1H
PULPROG zgpg30
TD        65536
SOLVENT  CDCl3
NS        1024
DS        4
SWH      18028.846 Hz
FIDRES   0.275098 Hz
AQ        1.8175317 sec
RG        812
DE        27.733 usec
TE        6.50 usec
TE        300.0 K
D1        2.00000000 sec
D11       0.03000000 sec
TD0       1

===== CHANNEL f1 =====
SFO1      75.4752949 MHz
NUC1      13C
P1        9.47 usec
PLW1      38.00000000 W

===== CHANNEL f2 =====
SFO2      300.1312005 MHz
NUC2      1H
PCPDPRG[2] waltz16
PCPD2     90.00 usec
PLW2      10.69999981 W
PLW12     0.22325000 W
PLW13     0.11229000 W

F2 - Processing parameters
SI        32768
SF        75.4677485 MHz
WDW       EM
SSB       0
LB        1.00 Hz
GB        0
PC        1.40
  
```

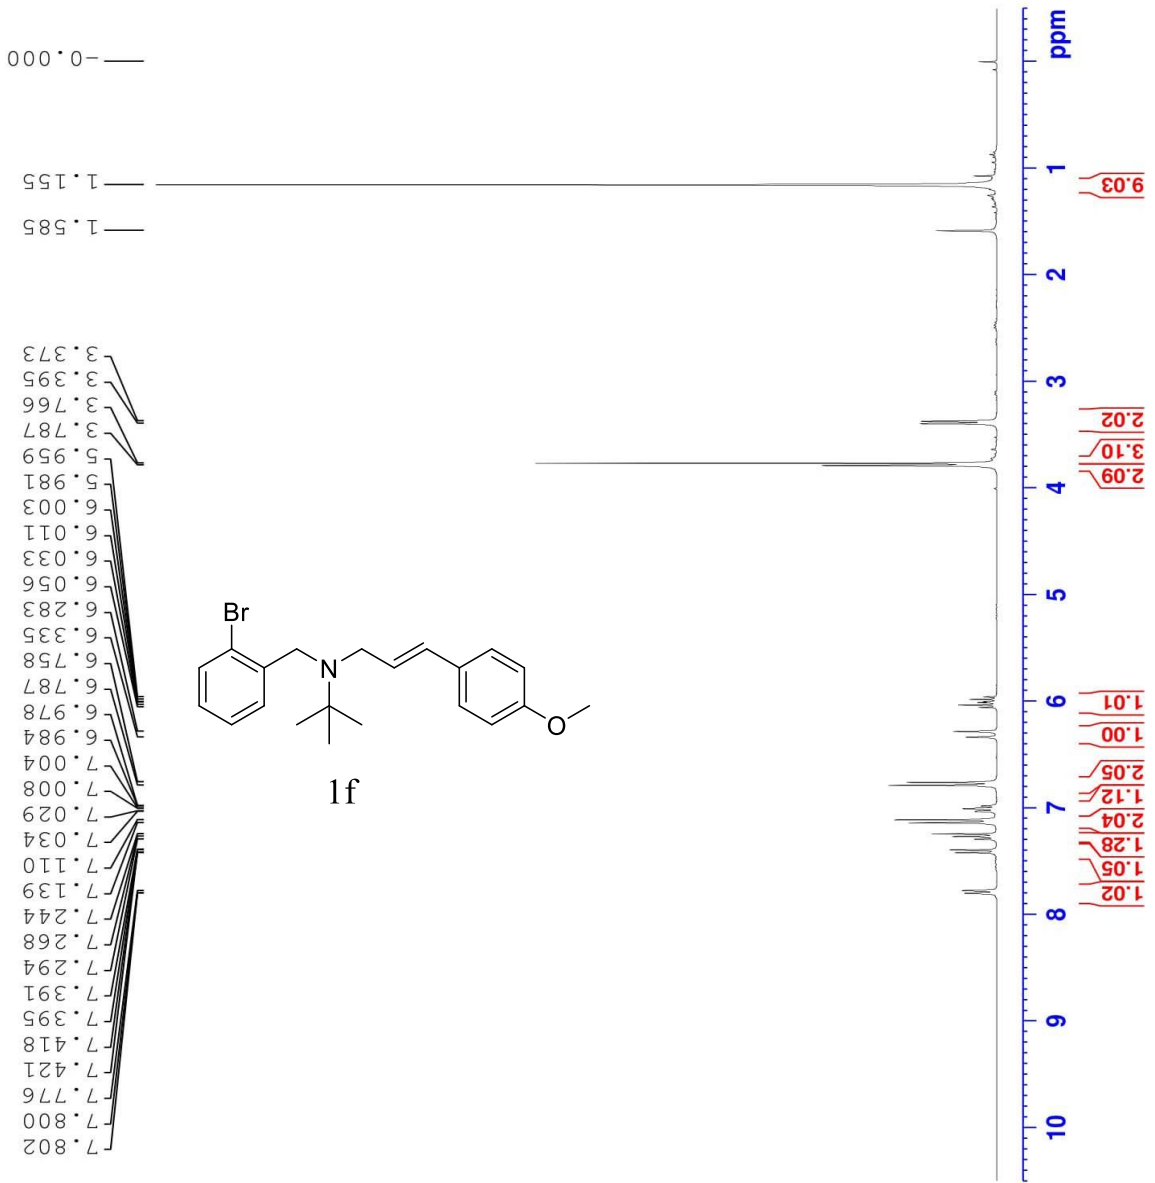

Current Data Parameters  
 NAME 35610  
 EXPNO 1  
 PROCNO 1

F2 - Acquisition Parameters  
 Date\_ 20180405  
 Time 16.13  
 INSTRUM spect  
 PROBHD 5 mm BBO BB-IH  
 PULPROG zg30  
 TD 65536  
 SOLVENT CDCl3  
 NS 16  
 DS 2  
 SWH 6009.615 Hz  
 FIDRES 0.091699 Hz  
 AQ 5.4525952 sec  
 RG 90.5  
 DW 83.200 usec  
 DE 6.50 usec  
 TE 298.0 K  
 D1 1.0000000 sec  
 TD0 1

==== CHANNEL f1 =====  
 SF01 300.1318534 MHz  
 NUC1 1H  
 P1 13.00 usec  
 PLW1 10.6999981 W

F2 - Processing parameters  
 SI 65536  
 SF 300.1300114 MHz  
 WDW EM  
 SSB 0  
 LB 0.30 Hz  
 GB 0  
 PC 1.00

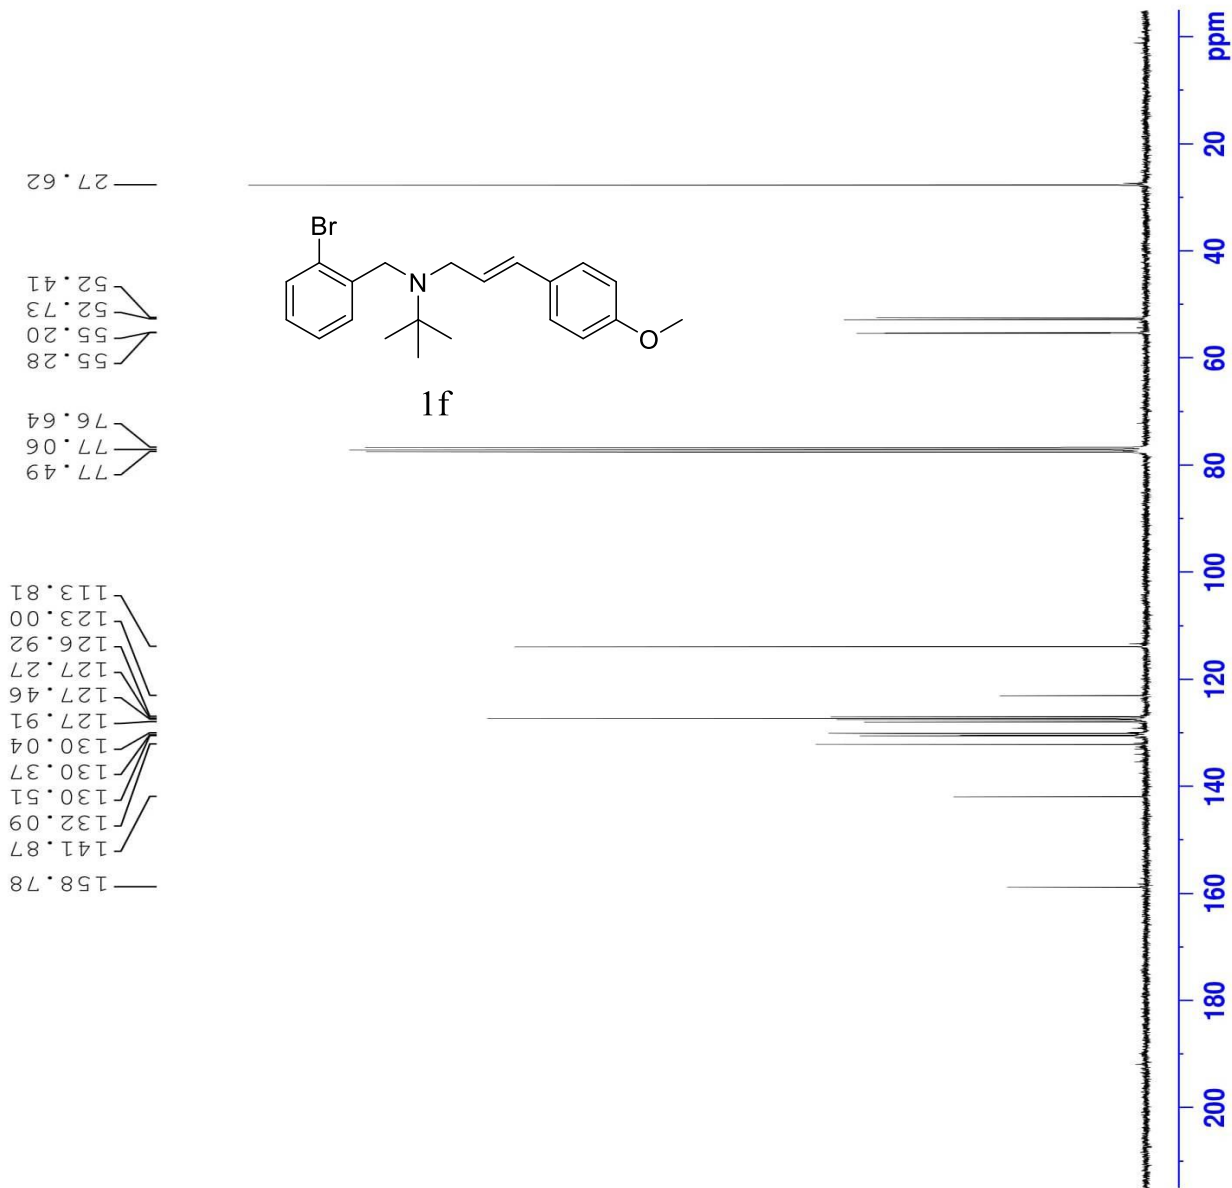

Current Data Parameters  
 NAME C2552F8  
 EXPNO 1  
 PROCNO 1

F2 - Acquisition Parameters

Date\_ 20190129  
 Time 11.57  
 INSTRUM spect  
 PROBHD 5 mm BBO BB-1H  
 PULPROG zgpg30  
 TD 65536  
 SOLVENT CDCl3  
 NS 1024  
 DS 4  
 SWH 18028.846 Hz  
 FIDRES 0.275098 Hz  
 AQ 1.8175317 sec  
 RG 1290  
 DW 27.733 usec  
 DE 6.50 usec  
 TE 300.0 K  
 D1 2.0000000 sec  
 D11 0.0300000 sec  
 TD0 1

==== CHANNEL f1 =====  
 SFO1 75.4752949 MHz  
 NUC1 13C  
 P1 9.47 usec  
 PLW1 38.00000000 W

==== CHANNEL f2 =====  
 SFO2 300.1312005 MHz  
 NUC2 1H  
 CPDPRG[2] waltz16  
 PCPD2 90.00 usec  
 PLW2 10.69999981 W  
 PLW12 0.22325000 W  
 PLW13 0.11229000 W

F2 - Processing parameters  
 SI 32768  
 SF 75.4677485 MHz  
 WDW EM  
 SSB 0  
 LB 1.00 Hz  
 GB 0  
 PC 1.40

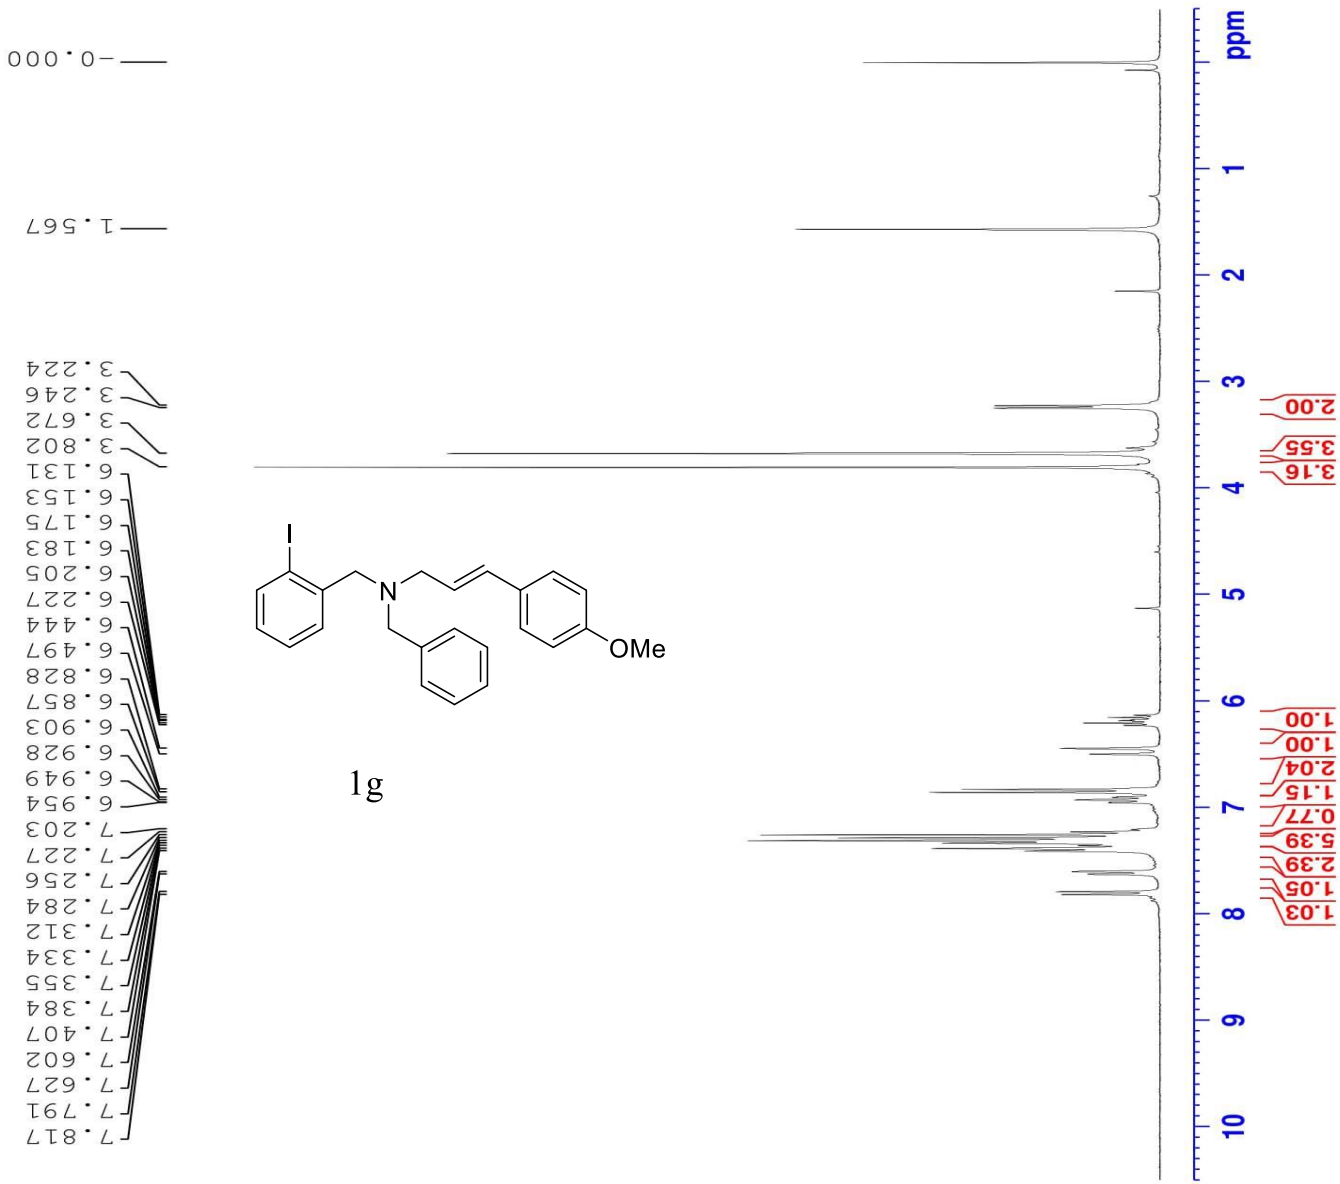

Current Data Parameters  
 NAME 3642M  
 EXPNO 1  
 PROCNO 1

F2 - Acquisition Parameters  
 Date\_ 20180503  
 Time 16.49  
 INSTRUM spect  
 PFOBHD 5 mm BBO BB-IH  
 PULPROG zg30  
 TD 65536  
 SOLVENT CDC13  
 NS 16  
 DS 2  
 SWH 6009.615 Hz  
 FIDRES 0.091699 Hz  
 AQ 5.4525952 sec  
 RG 287  
 DW 83.200 usec  
 DE 6.50 usec  
 TE 298.0 K  
 D1 1.00000000 sec  
 TD0 1

==== CHANNEL f1 =====  
 SFO1 300.1318534 MHz  
 NUC1 1H  
 P1 13.00 usec  
 PLW1 10.6999981 W

F2 - Processing parameters  
 SI 65536  
 SF 300.1300080 MHz  
 WDW EM  
 SSB 0  
 LB 0.30 Hz  
 GB 0  
 PC 1.00

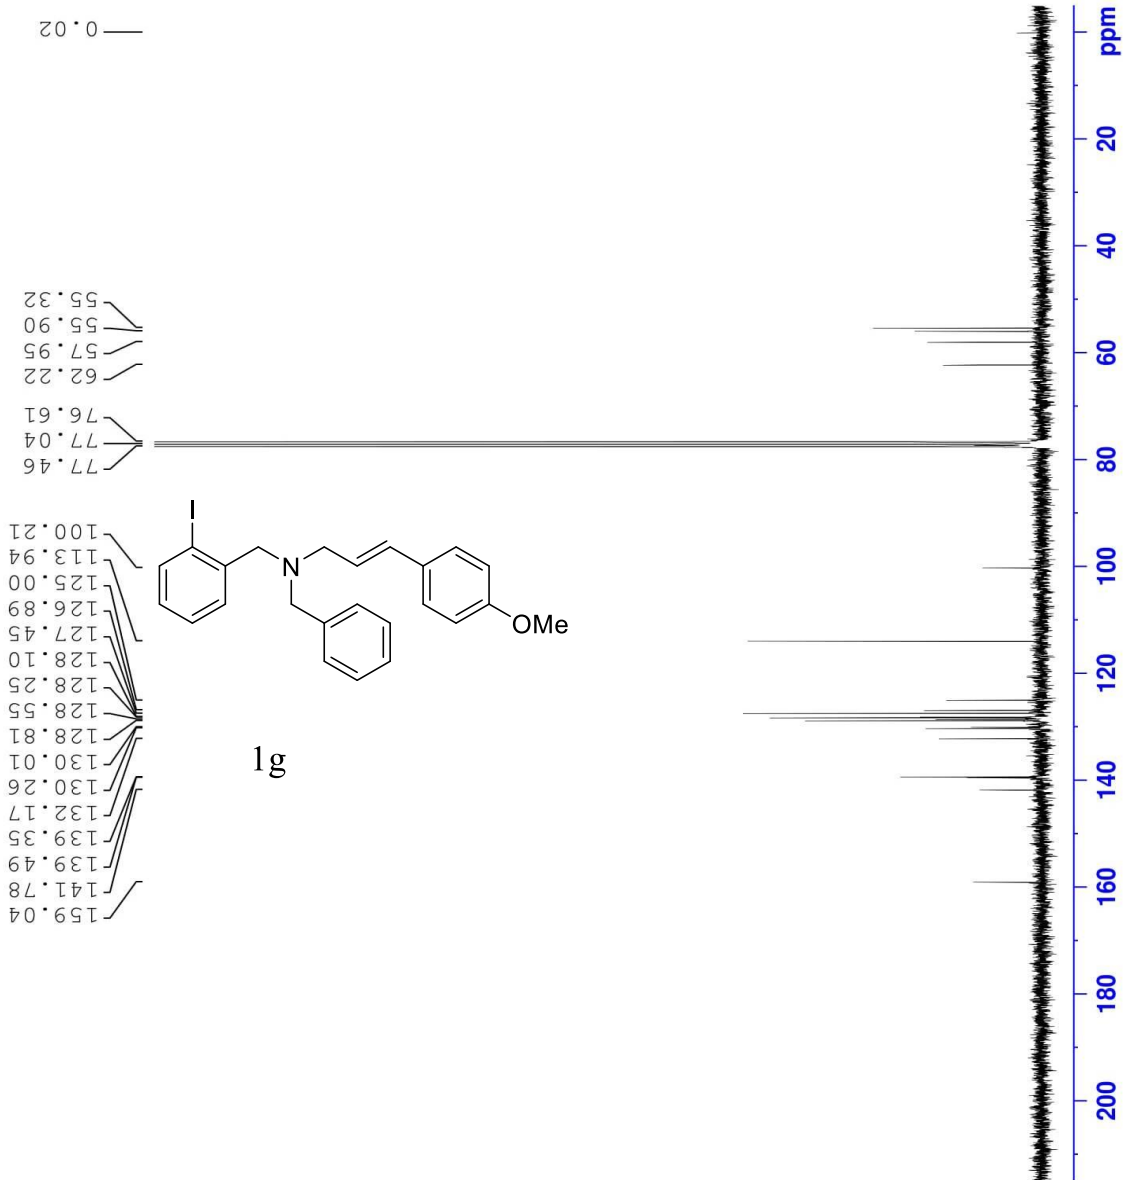

Current Data Parameters  
 NAME 3688F  
 EXPNO 1  
 PROCNO 1

F2 - Acquisition Parameters  
 Date\_ 20180524  
 Time 13.49  
 INSTRUM spect  
 PROBHD 5 mm BBO BB-1H  
 PULPROG zgpg30  
 TD 65536  
 SOLVENT CDCl3  
 NS 1024  
 DS 4  
 SWH 18028.846 Hz  
 FIDRES 0.275098 Hz  
 AQ 1.8175317 sec  
 RG 812  
 DW 27.733 usec  
 DE 6.50 usec  
 TE 300.0 K  
 D1 2.0000000 sec  
 D11 0.0300000 sec  
 TDO 1

==== CHANNEL f1 =====  
 SFO1 75.4752949 MHz  
 NUC1 13C  
 P1 9.47 usec  
 PLW1 38.0000000 W

==== CHANNEL f2 =====  
 SFO2 300.1312005 MHz  
 NUC2 1H  
 CPDPRG2 waltz16  
 PCPD2 90.00 usec  
 PLW2 10.6999981 W  
 PLW12 0.2232500 W  
 PLW13 0.1122900 W

F2 - Processing parameters  
 SI 32768  
 SF 75.4677485 MHz  
 WDW EM  
 SSB 0  
 LB 1.00 Hz  
 GB 0  
 PC 1.40

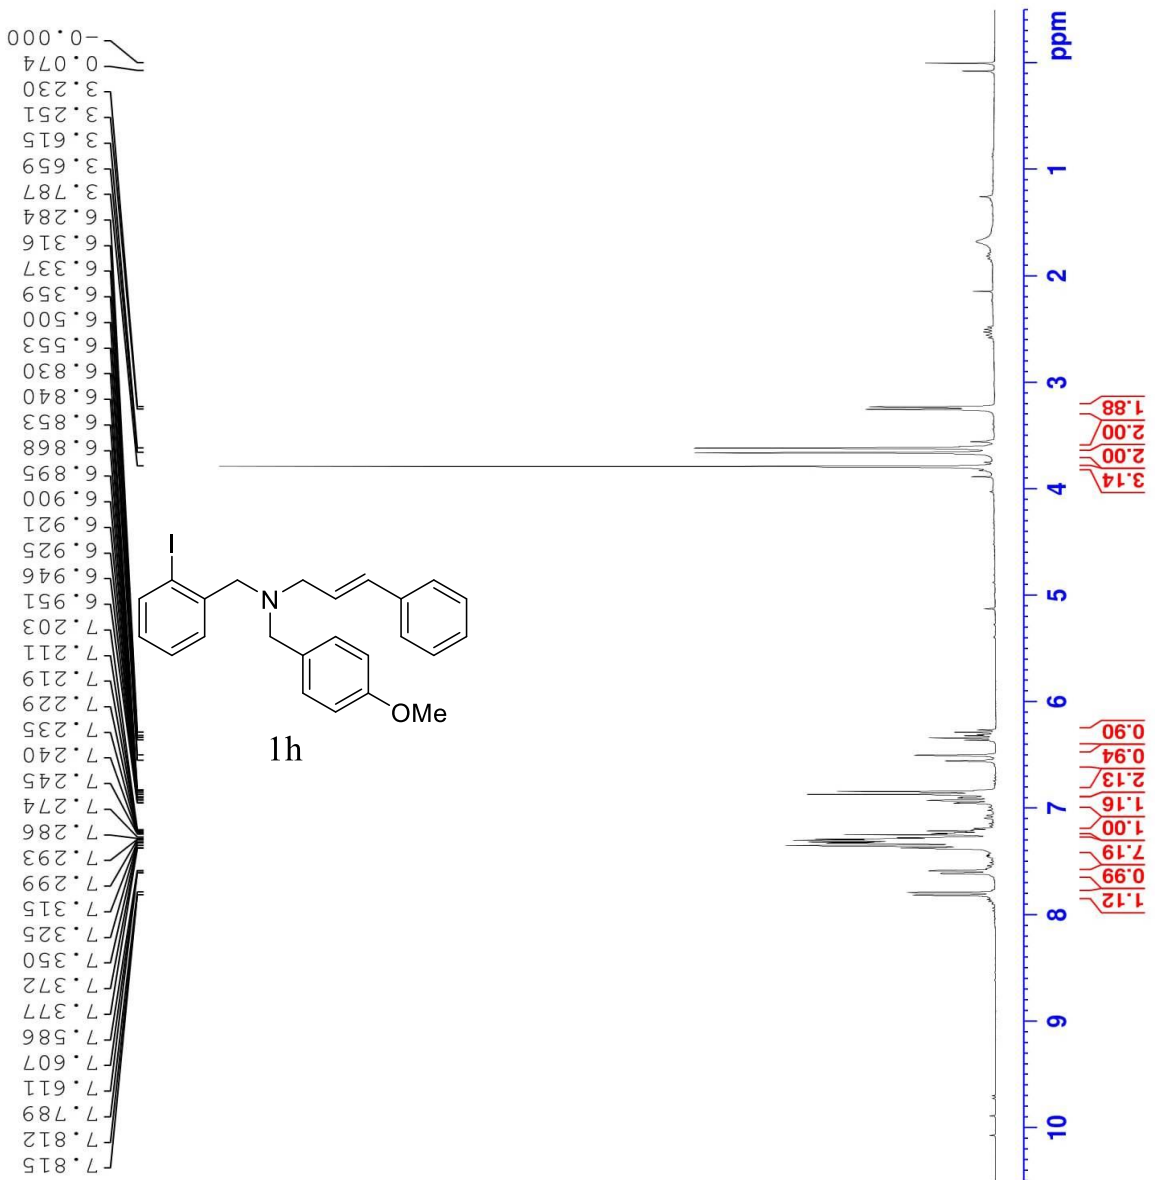



158.71  
141.85  
139.44  
137.26  
132.70  
131.36  
130.35  
130.06  
128.65  
128.62  
128.18  
127.49  
127.43  
126.40  
113.75  
100.35  
77.61  
77.19  
76.77  
62.21  
57.44  
55.73  
55.33

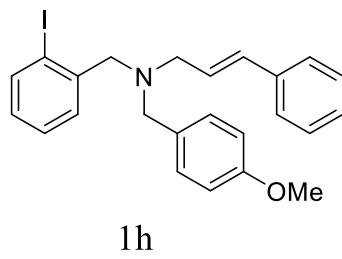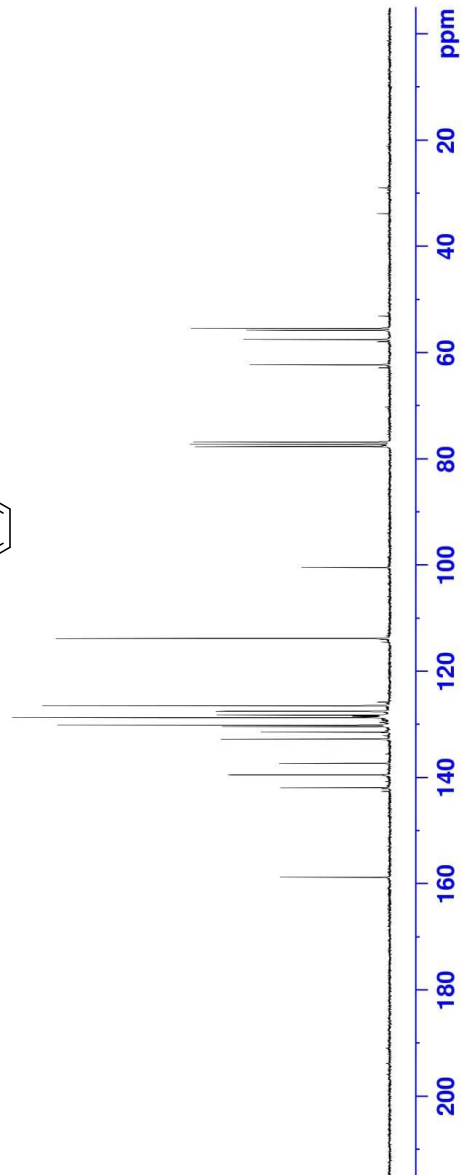

Current Data Parameters  
NAME 3788G  
EXPNO 1  
PROCNO 1

F2 - Acquisition Parameters

Date\_ 20180524  
Time 16.26  
INSTRUM spect  
PROBHD 5 mm BBO BB-IH  
PULPROG zgpg30  
TD 65536  
SOLVENT CDCl3  
NS 1024  
DS 4  
SWH 18028.846 Hz  
FIDRES 0.275098 Hz  
AQ 1.8175317 sec  
RG 812  
DW 27.733 usec  
DE 6.50 usec  
TE 300.0 K  
D1 2.00000000 sec  
D11 0.03000000 sec  
TD0 1

==== CHANNEL f1 =====  
SFO1 75.4752949 MHz  
NUC1 13C  
P1 9.47 usec  
PLW1 38.00000000 W

==== CHANNEL f2 =====  
SFO2 300.1312005 MHz  
NUC2 1H  
CFPRG12 waitz16  
PCPD2 90.00 usec  
PLW2 10.69999981 W  
PLW12 0.22325000 W  
PLW13 0.11229000 W

F2 - Processing parameters  
SI 32768  
SF 75.4677485 MHz  
WDW EM  
SSB 0  
LB 1.00 Hz  
GB 0  
PC 1.40

7.872  
7.846  
7.829  
7.372  
7.349  
7.319  
7.295  
7.269  
7.238  
7.214  
7.205  
7.186  
7.161  
7.089  
7.062  
7.020  
6.992  
6.961  
6.936  
6.907  
6.579  
6.519  
6.480  
6.459  
6.431  
6.334  
6.317  
6.300  
6.281  
6.264  
6.247  
4.434  
4.287  
4.175  
4.159  
2.236  
2.215  
1.574

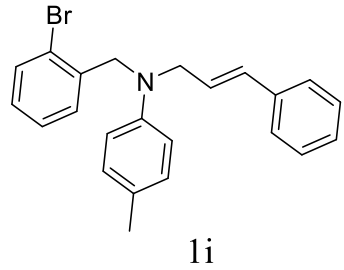

Current Data Parameters  
 NAME 3692L  
 EXPNO 1  
 PROCNO 1

F2 - Acquisition Parameters  
 Date\_ 20180621  
 Time 15.41  
 INSTRUM spect  
 PROBHD 5 mm BBO BB-1H  
 PULPROG zg30  
 TD 65536  
 SOLVENT CDCl3  
 NS 16  
 DS 2  
 SWH 6009.615 Hz  
 FIDRES 0.091699 Hz  
 AQ 5.4525952 sec  
 RG 144  
 DW 83.200 usec  
 DE 6.50 usec  
 TE 298.0 K  
 D1 1.00000000 sec  
 TD0 1

==== CHANNEL f1 =====  
 SF01 300.1318534 MHz  
 NUC1 1H  
 P1 13.00 usec  
 PLW1 10.6999981 W

F2 - Processing parameters  
 SI 65536  
 SF 300.1300133 MHz  
 WDW EM  
 SSB 0  
 LB 0.30 Hz  
 GB 0  
 PC 1.00

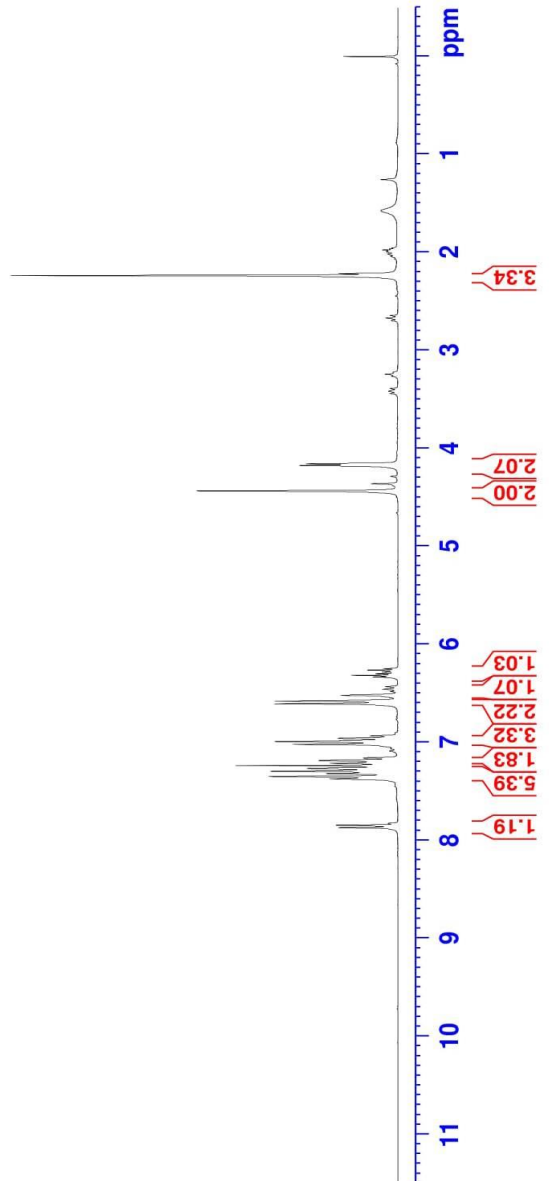

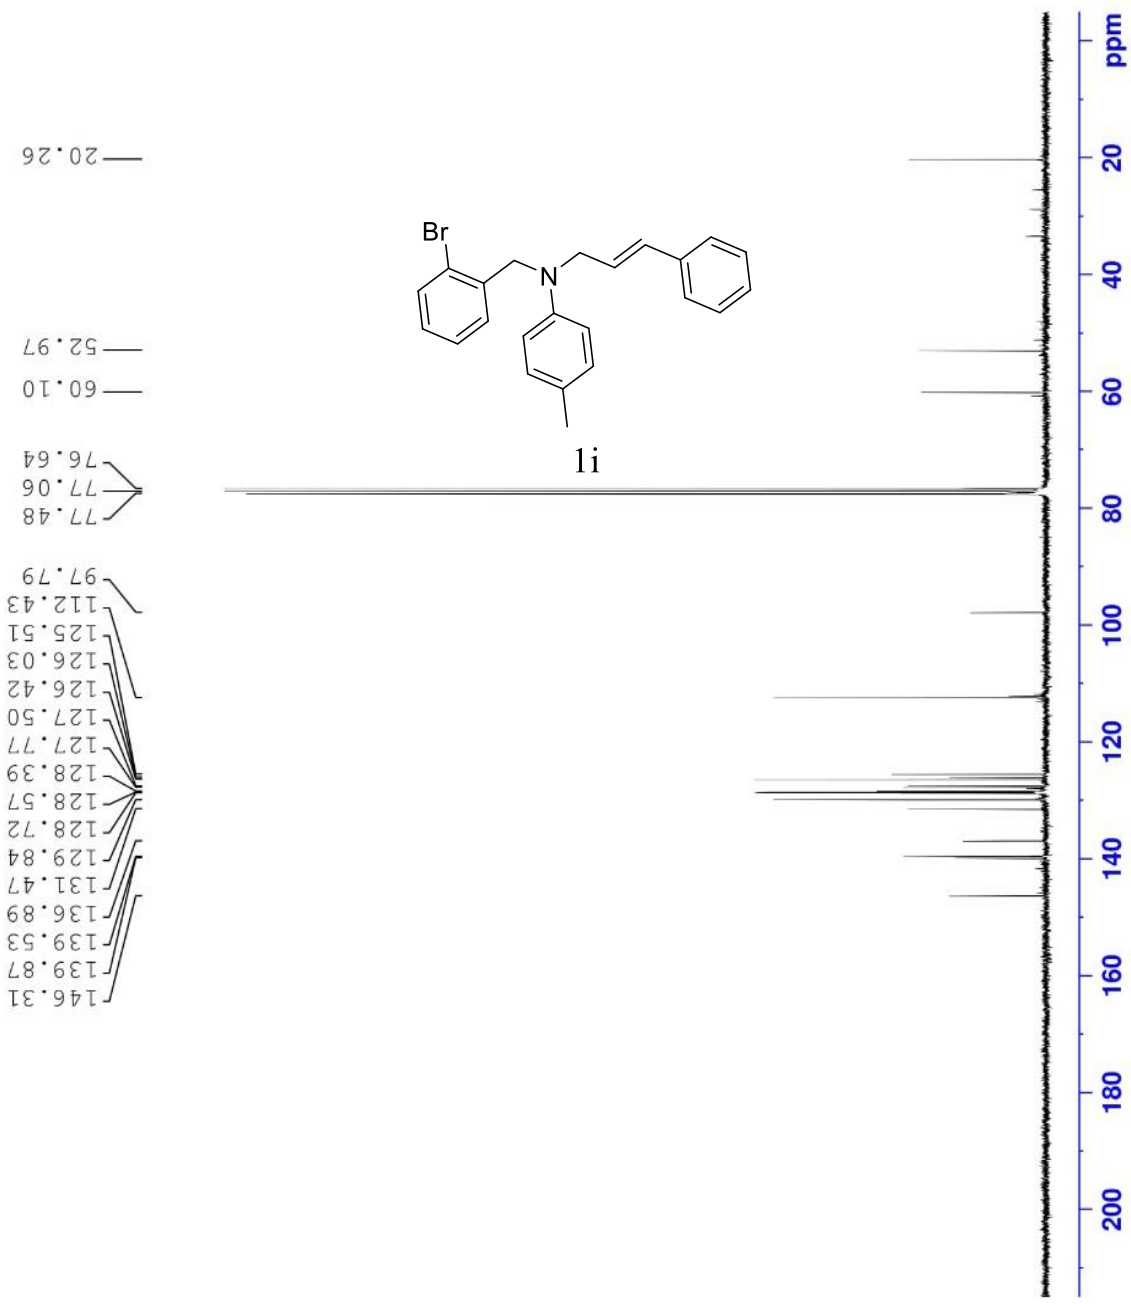

```

Current Data Parameters
NAME      C2552B2
EXPNO    1
PROCNO   1

F2 - Acquisition Parameters
Date_    20180630
Time     13.04
INSTRUM  spect
PROBHD   5 mm BBO BB-1H
PULPROG  zgpg30
TD       65536
SOLVENT  CDCl3
NS       1112
DS       4
SWH      18028.846 Hz
FIDRES   0.275098 Hz
AQ       1.8175317 sec
RG       912
DE       27.733 usec
TE       300.0 K
D1       2.00000000 sec
D11      0.03000000 sec
TD0      1

===== CHANNEL f1 =====
SFO1     75.4752949 MHz
NUC1     13C
P1       9.47 usec
PLW1     38.00000000 W

===== CHANNEL f2 =====
SFO2     300.1312005 MHz
NUC2     1H
CPDPRG2  waltz16
PCPD2    90.00 usec
PLW2     10.69999981 W
PLW12    0.22325000 W
PLW13    0.11229000 W

F2 - Processing parameters
SI       32768
SF       75.4677485 MHz
WDW      EM
SSB      0
LB       1.00 Hz
GB       0
PC       1.40

```

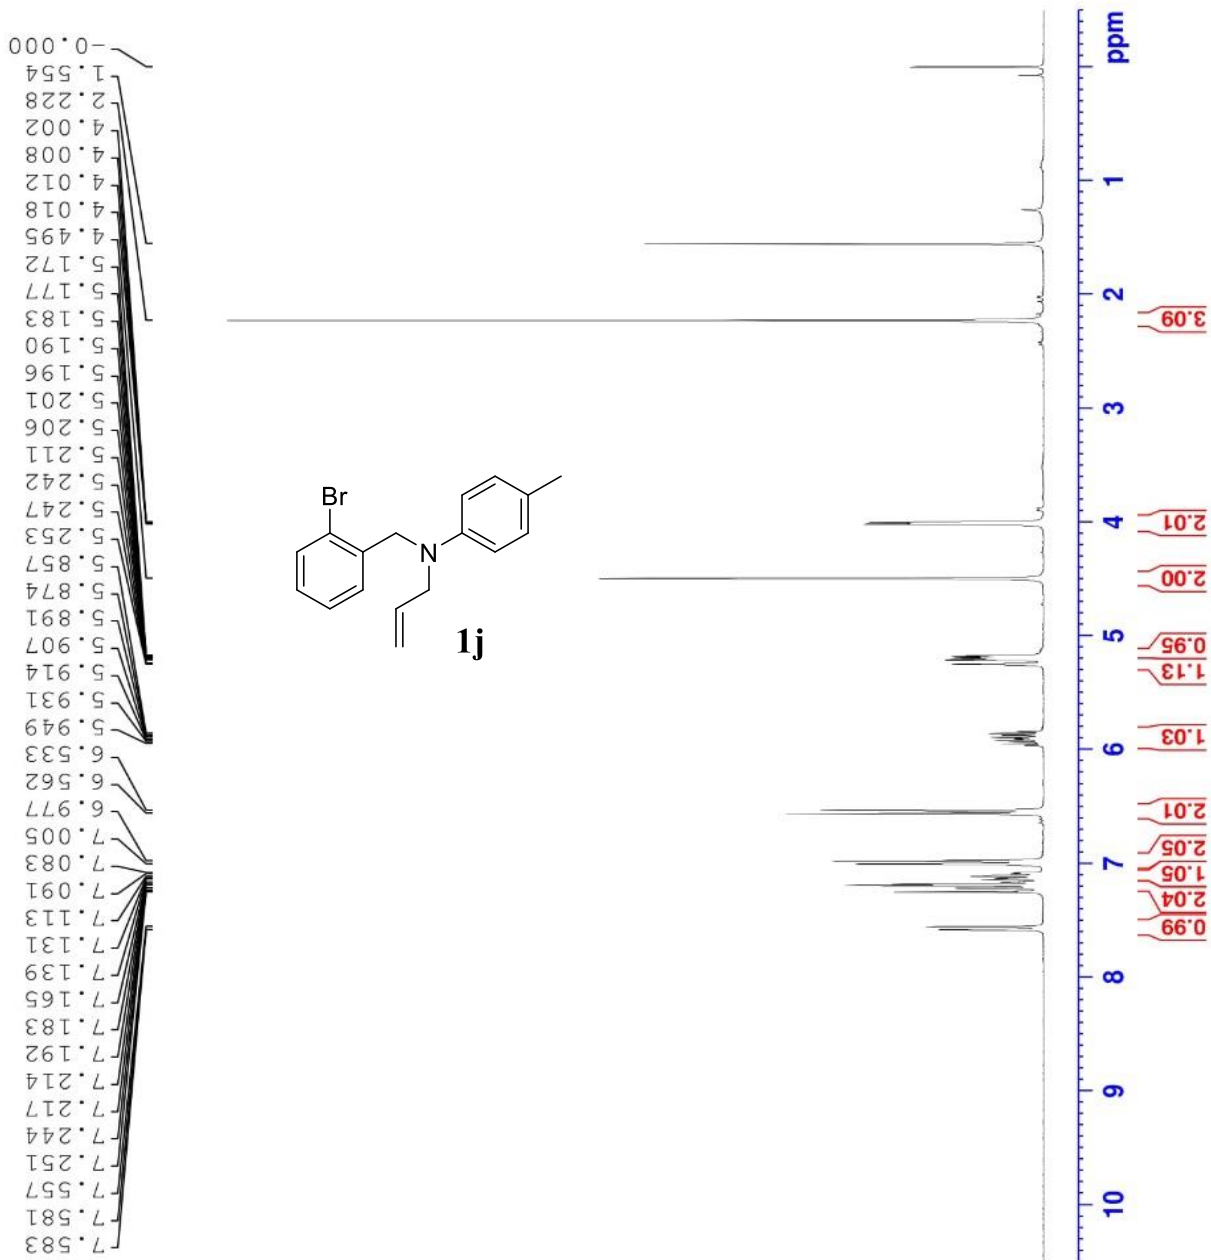

Current Data Parameters  
 NAME H3339D2  
 EXPNO 1  
 PROCNO 1

F2 - Acquisition Parameters  
 Date\_ 20190621  
 Time 12.35  
 INSTRUM spect  
 PROBHD 5 mm BBO BB-IH  
 PULPROG zg30  
 TD 65536  
 SOLVENT CDCl3  
 NS 16  
 DS 2  
 SWH 6009.615 Hz  
 FIDRES 0.091699 Hz  
 AQ 5.4525952 sec  
 RG 181  
 DW 83.200 usec  
 DE 6.50 usec  
 TE 298.0 K  
 D1 1.00000000 sec  
 TD0 1

===== CHANNEL f1 =====  
 SF01 300.1318534 MHz  
 NUC1 1H  
 P1 13.00 usec  
 PLW1 10.69999981 W

F2 - Processing parameters  
 SI 65536  
 SF 300.1300093 MHz  
 EM  
 WDW 0  
 SSB 0  
 LB 0.30 Hz  
 GB 0  
 PC 1.00

146.31  
137.44  
133.60  
132.80  
129.73  
128.31  
128.02  
127.50  
125.81  
122.74  
116.42  
112.24

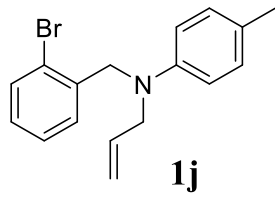

77.46  
77.03  
76.61  
55.05  
53.41  
20.21

```

Current Data Parameters
NAME      C3339B10
EXPNO     1
PROCNO    1

F2 - Acquisition Parameters
Date_     20190625
Time      19.38
INSTRUM   spect
PROBHD    5 mm BBO BB-IH
PULPROG   zgpg30
TD         65536
SOLVENT   CDC13
NS         2048
DS         4
SWH        18028.846 Hz
FIDRES     0.275098 Hz
AQ         1.8175317 sec
RG         724
DW         27.733 usec
DE         6.50 usec
TE         300.0 K
D1         2.00000000 sec
D11        0.03000000 sec
TD0        1

===== CHANNEL f1 =====
SFO1      75.4752949 MHz
NUC1       13C
P1         9.47 usec
PLW1      38.00000000 W

===== CHANNEL f2 =====
SFO2      300.1312005 MHz
NUC2       1H
CPDPRG[2] waltz16
PCPD2     90.00 usec
PLW2      10.69999981 W
PLW12     0.22325000 W
PLW13     0.11229000 W

F2 - Processing parameters
SI         32768
SF         75.4677485 MHz
WDW        EM
SSB        0
LB         1.00 Hz
GB         0
PC         1.40
  
```

200 180 160 140 120 100 80 60 40 20 ppm

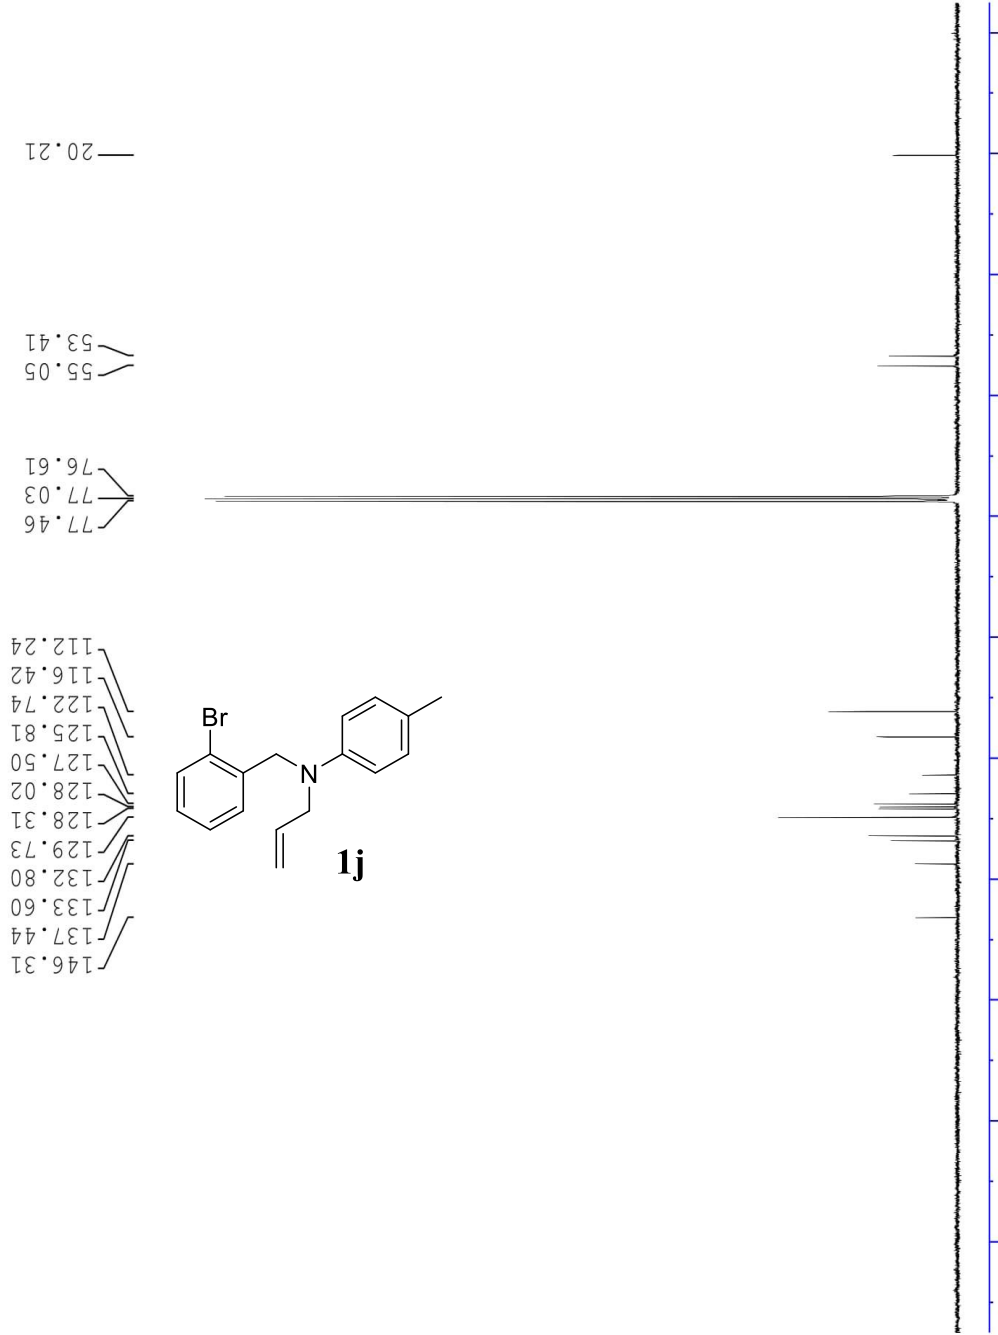

7.577  
7.552  
7.521  
7.494  
7.302  
7.277  
7.249  
7.107  
7.081  
7.056  
5.954  
5.933  
5.920  
5.912  
5.899  
5.877  
5.863  
5.855  
5.842  
5.821  
5.239  
5.181  
5.177  
5.154  
5.120  
3.654  
3.133  
3.112

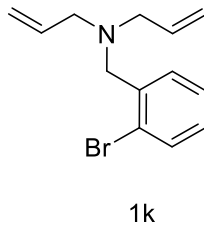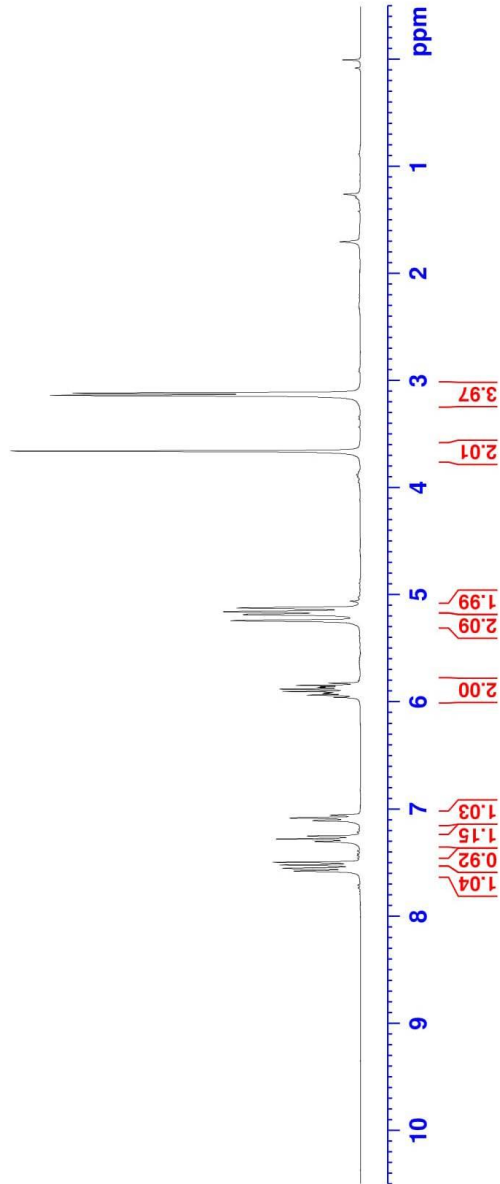

Current Data Parameters  
 NAME 3679E  
 EXPNO 1  
 PROCNO 1

F2 - Acquisition Parameters  
 Date\_ 20180522  
 Time 11.10  
 INSTRUM spect  
 PROBHD 5 mm BBO BB-1H  
 PULPROG zg30  
 TD 65536  
 SOLVENT CDCl3  
 NS 16  
 DS 2  
 SWH 6009.615 Hz  
 FIDRES 0.091699 Hz  
 AQ 5.4525952 sec  
 RG 80.6  
 DW 83.200 usec  
 DE 6.50 usec  
 TE 288.0 K  
 D1 1.00000000 sec  
 TD0 1

==== CHANNEL f1 =====  
 SFO1 300.1318534 MHz  
 NUC1 1H  
 P1 13.00 usec  
 PLW1 10.6999981 W

F2 - Processing parameters  
 SI 65536  
 SF 300.1300108 MHz  
 WDW EM  
 SSB 0  
 LB 0  
 GB 0  
 PC 1.00

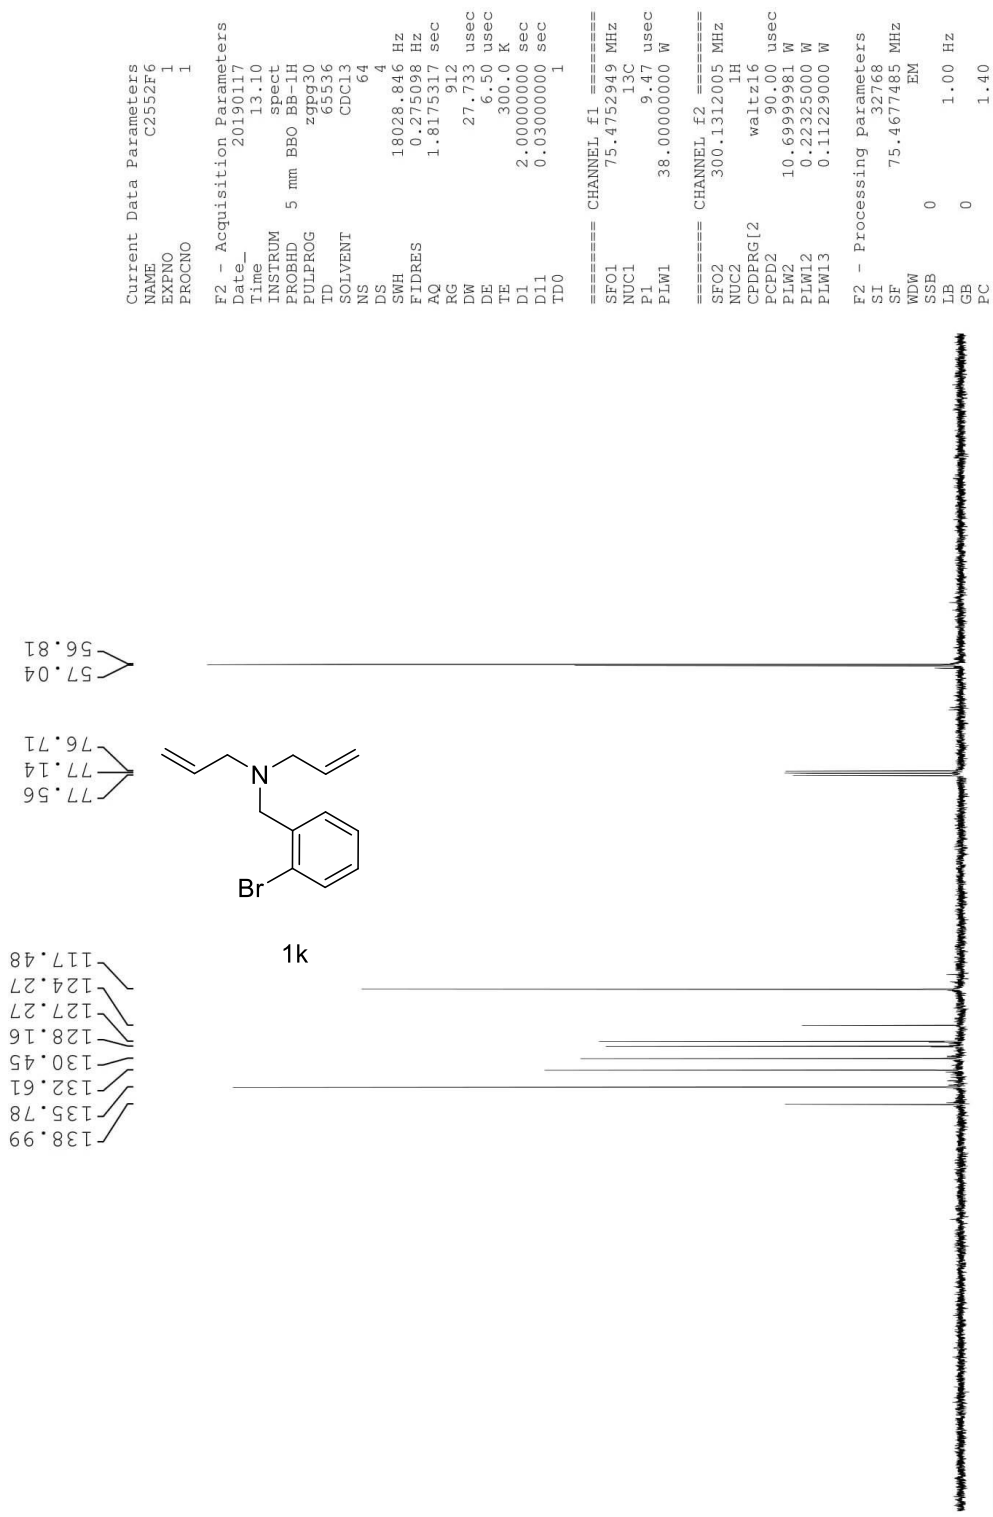

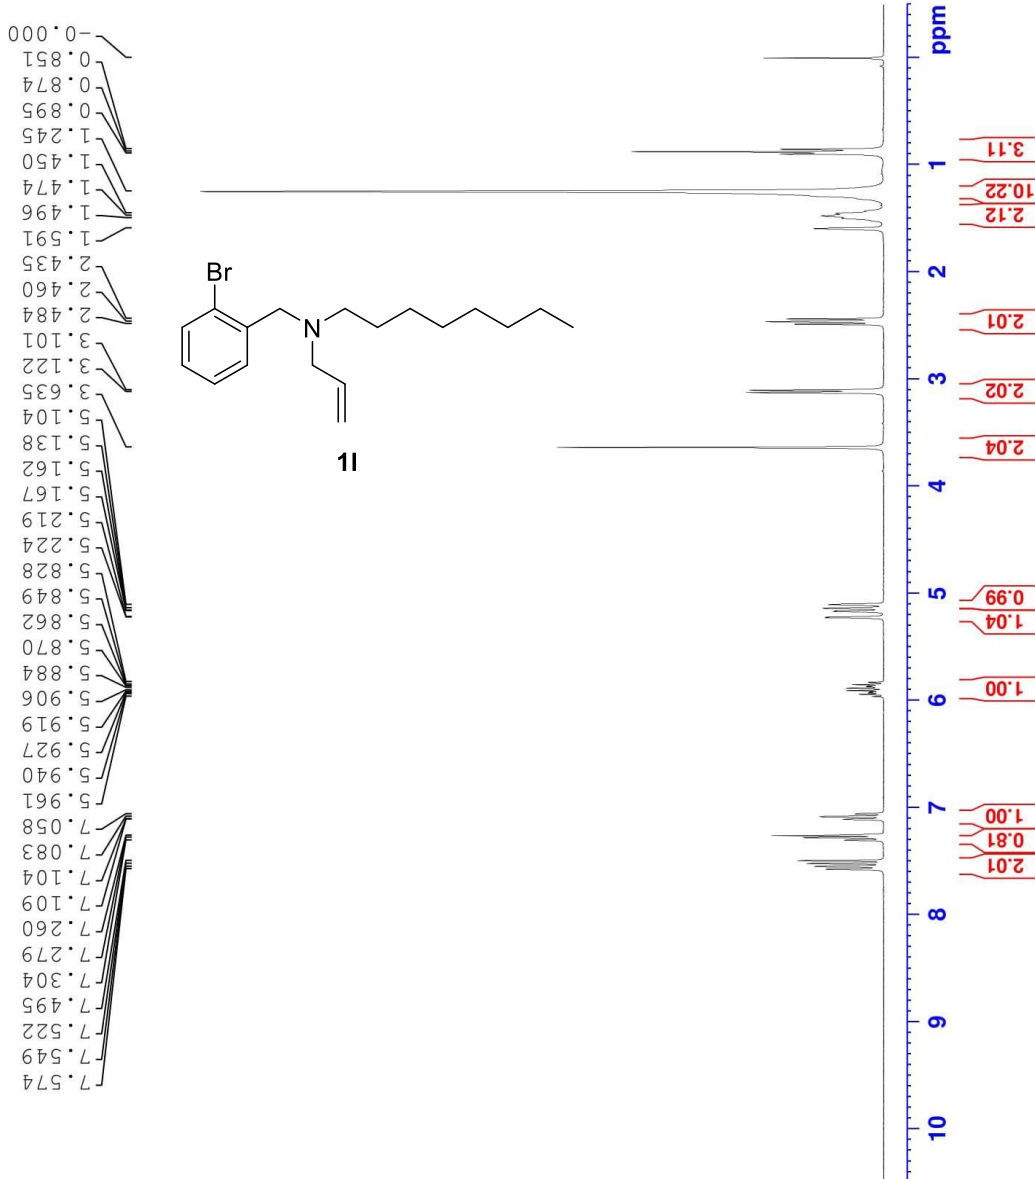



139.36  
136.08  
132.49  
130.51  
127.99  
127.15  
124.16  
117.05

77.44  
77.02  
76.59

57.62  
57.15  
53.92

31.87  
29.51  
29.32  
27.40  
27.11  
22.67  
14.12

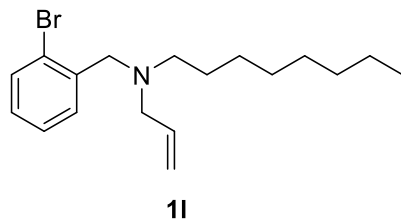

```

Current Data Parameters
NAME      C2552B10
EXPNO    1
PROCNO   1

F2 - Acquisition Parameters
Date_    20180724
Time     19.45
INSTRUM spect
PROBHD   5 mm BBO BB-1H
PULPROG zgpg30
TD       65536
SOLVENT  CDCl3
NS       2048
DS       4
SWH      18028.846 Hz
FIDRES   0.275098 Hz
AQ       1.8175317 sec
RG       912
DW       27.733 usec
DE       6.50 usec
TE       300.0 K
D1       2.00000000 sec
D11      0.03000000 sec
TD0      1

===== CHANNEL f1 =====
SFO1    75.4752949 MHz
NUC1    13C
P1      9.47 usec
PLW1    38.00000000 W

===== CHANNEL f2 =====
SFO2    300.1312005 MHz
NUC2    1H
CPDPRG2 waltz16
PCPD2   90.00 usec
PLW2    10.69999981 W
PLW12   0.22325000 W
PLW13   0.11229000 W

F2 - Processing parameters
SI       32768
SF       75.4677485 MHz
WDW      EM
SSB      0
LB       1.00 Hz
GB       0
PC       1.40
  
```

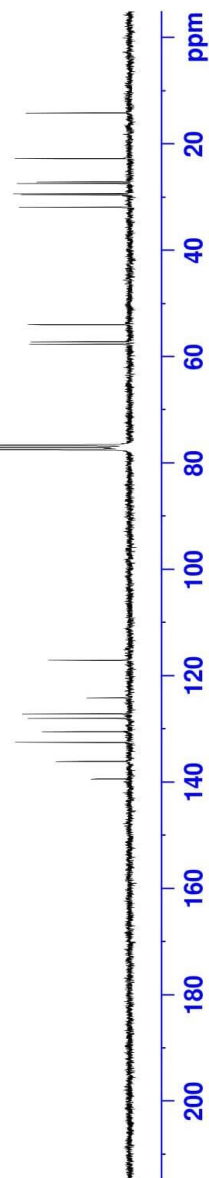

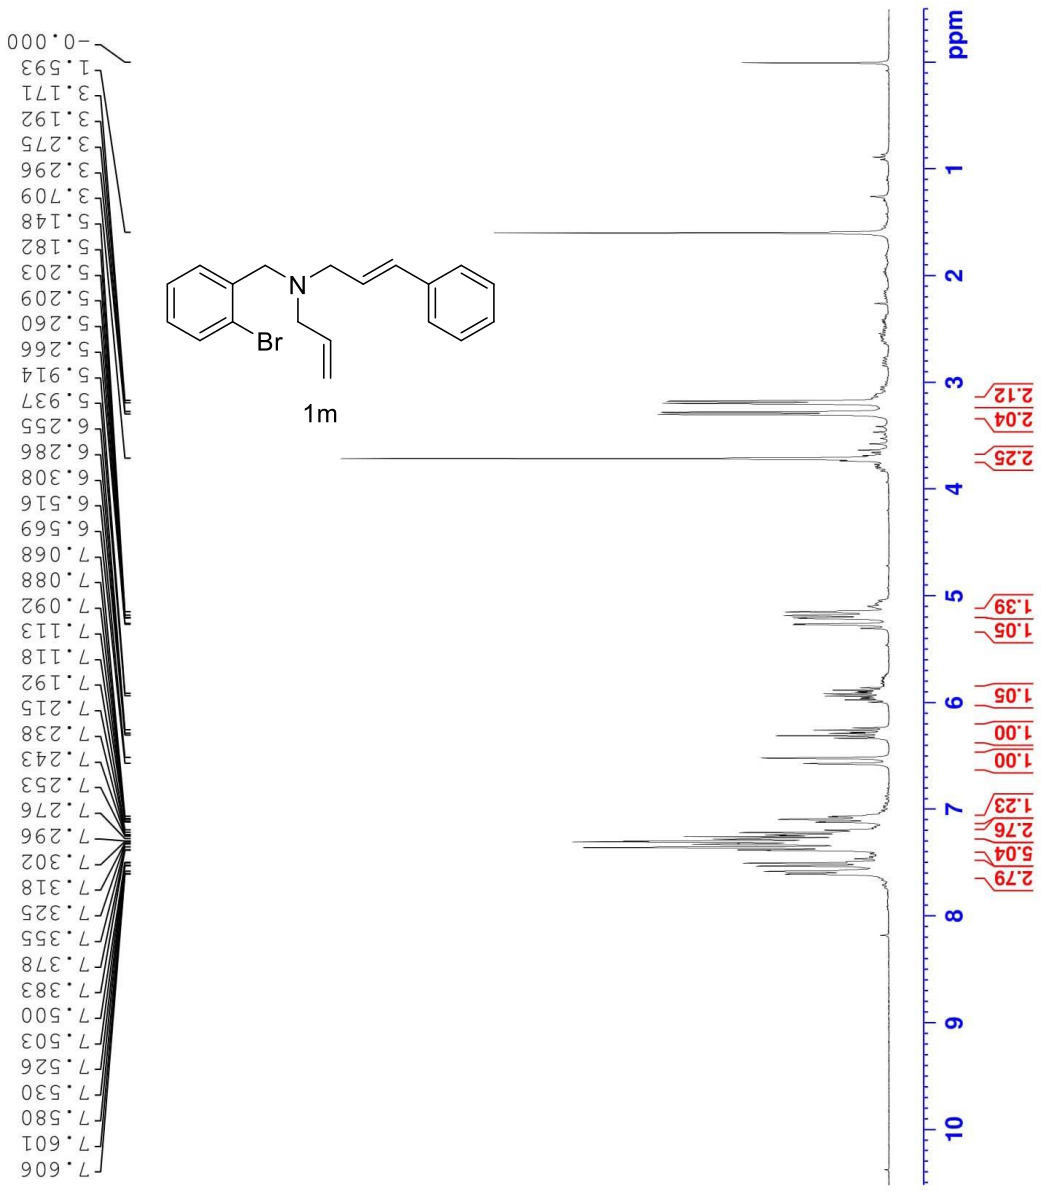

```

Current Data Parameters
NAME      H2552I7
EXPNO    1
PROCNO   1

F2 - Acquisition Parameters
Date_    20190221
Time     17.23
INSTRUM spect
PROBHD   5 mm BBO BB-1H
PULPROG zg30
TD       65536
SOLVENT  CDCl3
NS       16
DS       2
SWH      6009.615 Hz
FIDRES   0.091699 Hz
AQ       5.4525952 sec
RG       228
DW       83.200 usec
DE       6.50 usec
TE       298.0 K
D1       1.00000000 sec
TD0      1

===== CHANNEL f1 =====
SFO1     300.1318534 MHz
NUC1     1H
P1       13.00 usec
PLW1     10.6999981 W

F2 - Processing parameters
SI       65536
SF       300.1300089 MHz
WDW      EM
SSB      0
LB       0.30 Hz
GB       0
PC       1.00
  
```

138.98  
137.22  
135.81  
132.71  
132.58  
130.61  
128.61  
128.27  
127.56  
127.42  
127.33  
126.38  
124.39  
117.65

77.58  
77.15  
76.73  
57.22  
57.02  
56.26

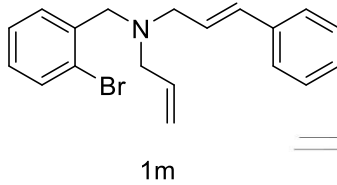

```

Current Data Parameters
NAME      C3339A2
EXPNO    1
PROCNO   1

F2 - Acquisition Parameters
Date_    20190222
Time     11.04
INSTRUM spect
PROBHD   5 mm BBO BB-1H
PULPROG zgpg30
TD       65536
SOLVENT  CDCl3
NS       128
DS       4
SWH      18028.846 Hz
FIDRES   0.275098 Hz
AQ       1.8175317 sec
RG       724
DW       27.733 usec
DE       6.50 usec
TE       300.0 K
D1       2.00000000 sec
D11      0.03000000 sec
TD0      1

===== CHANNEL f1 =====
SFO1    75.4752949 MHz
NUC1    13C
P1      9.47 usec
PLW1    38.00000000 W

===== CHANNEL f2 =====
SFO2    300.1312005 MHz
NUC2    1H
CPDPRG2 waltz16
PCPD2   90.00 usec
PLW2    10.69999981 W
PLW12   0.22325000 W
PLW13   0.11229000 W

F2 - Processing parameters
SI      32768
SF      75.4677485 MHz
WDW     EM
SSB     0
LB      1.00 Hz
GB      0
PC      1.40

```

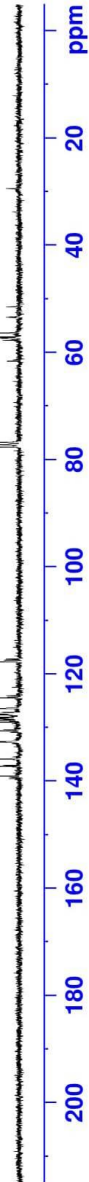

7.817  
7.791  
7.752  
7.527  
7.348  
7.316  
7.287  
7.257  
6.957  
6.931  
6.906  
6.857  
6.828  
6.501  
6.448  
6.185  
6.163  
6.141  
6.133  
6.110  
6.089  
5.989  
5.968  
5.947  
5.933  
5.911  
5.890  
5.877  
5.856  
5.256  
5.199  
5.173  
5.139  
3.802  
3.635  
3.271  
3.249  
3.185  
3.165  
1.573  
0.000

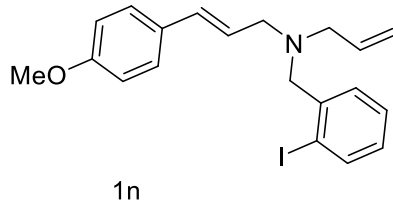

```

Current Data Parameters
NAME      H2552A5
EXPNO    1
PROCNO   1

F2 - Acquisition Parameters
Date_    20180704
Time     16.56
INSTRUM spect
PROBHD   5 mm BBO BB-1H
PULPROG zg30
TD       65536
SOLVENT  CDCl3
NS       16
DS       2
SWH      6009.615 Hz
FIDRES   0.091699 Hz
AQ       5.4525952 sec
RG       181
DW       83.200 usec
DE       6.50 usec
TE       298.0 K
D1       1.00000000 sec
TD0      1

===== CHANNEL f1 =====
SFO1    300.1318534 MHz
NUC1    1H
P1      13.00 usec
PLW1    10.69999981 W

F2 - Processing parameters
SI      65536
SF      300.1300078 MHz
WDW     EM
SSB     0
LB      0.30 Hz
GB      0
PC      1.00

```

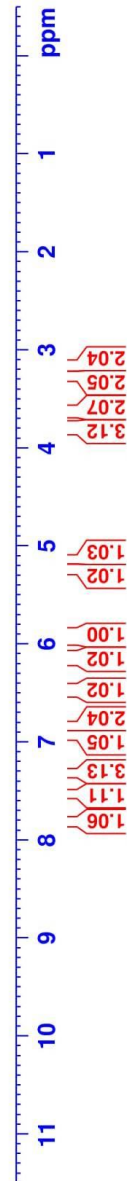

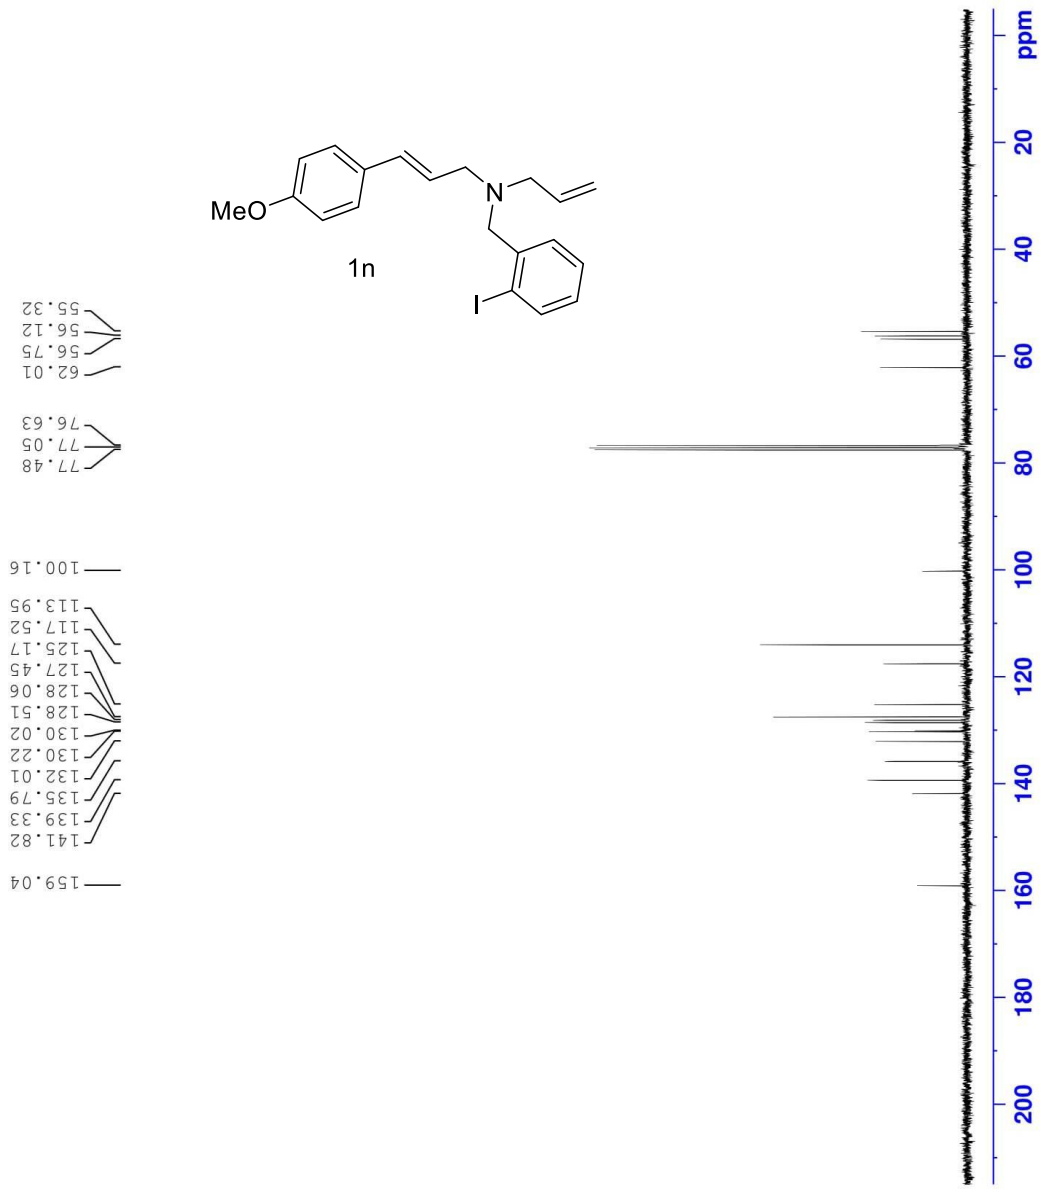

```

Current Data Parameters
NAME      C2552B7
EXPNO    1
PROCNO   1

F2 - Acquisition Parameters
Date_    20180705
Time     17.36
INSTRUM  spect
PROBHD   5 mm BBO BB-1H
PULPROG  zgpg30
TD       65536
SOLVENT  CDCl3
NS       136
DS       4
SWH      18028.846 Hz
FIDRES   0.275098 Hz
AQ       1.8175317 sec
RG       812
DW       27.733 usec
DE       6.50 usec
TE       300.0 K
D1       2.00000000 sec
D11      0.03000000 sec
TD0      1

===== CHANNEL f1 =====
SFO1    75.4752949 MHz
NUC1    13C
P1      9.47 usec
PLW1    38.00000000 W

===== CHANNEL f2 =====
SFO2    300.132005 MHz
NUC2    1H
CFPRG[2] waltz16
PCPD2   90.00 usec
PLW2    10.69999981 W
PLW12   0.22325000 W
PLW13   0.11229000 W

F2 - Processing parameters
SI      32768
SF      75.4677485 MHz
WDW     EM
SSB     0
LB      1.00 Hz
GB      0
PC      1.40

```

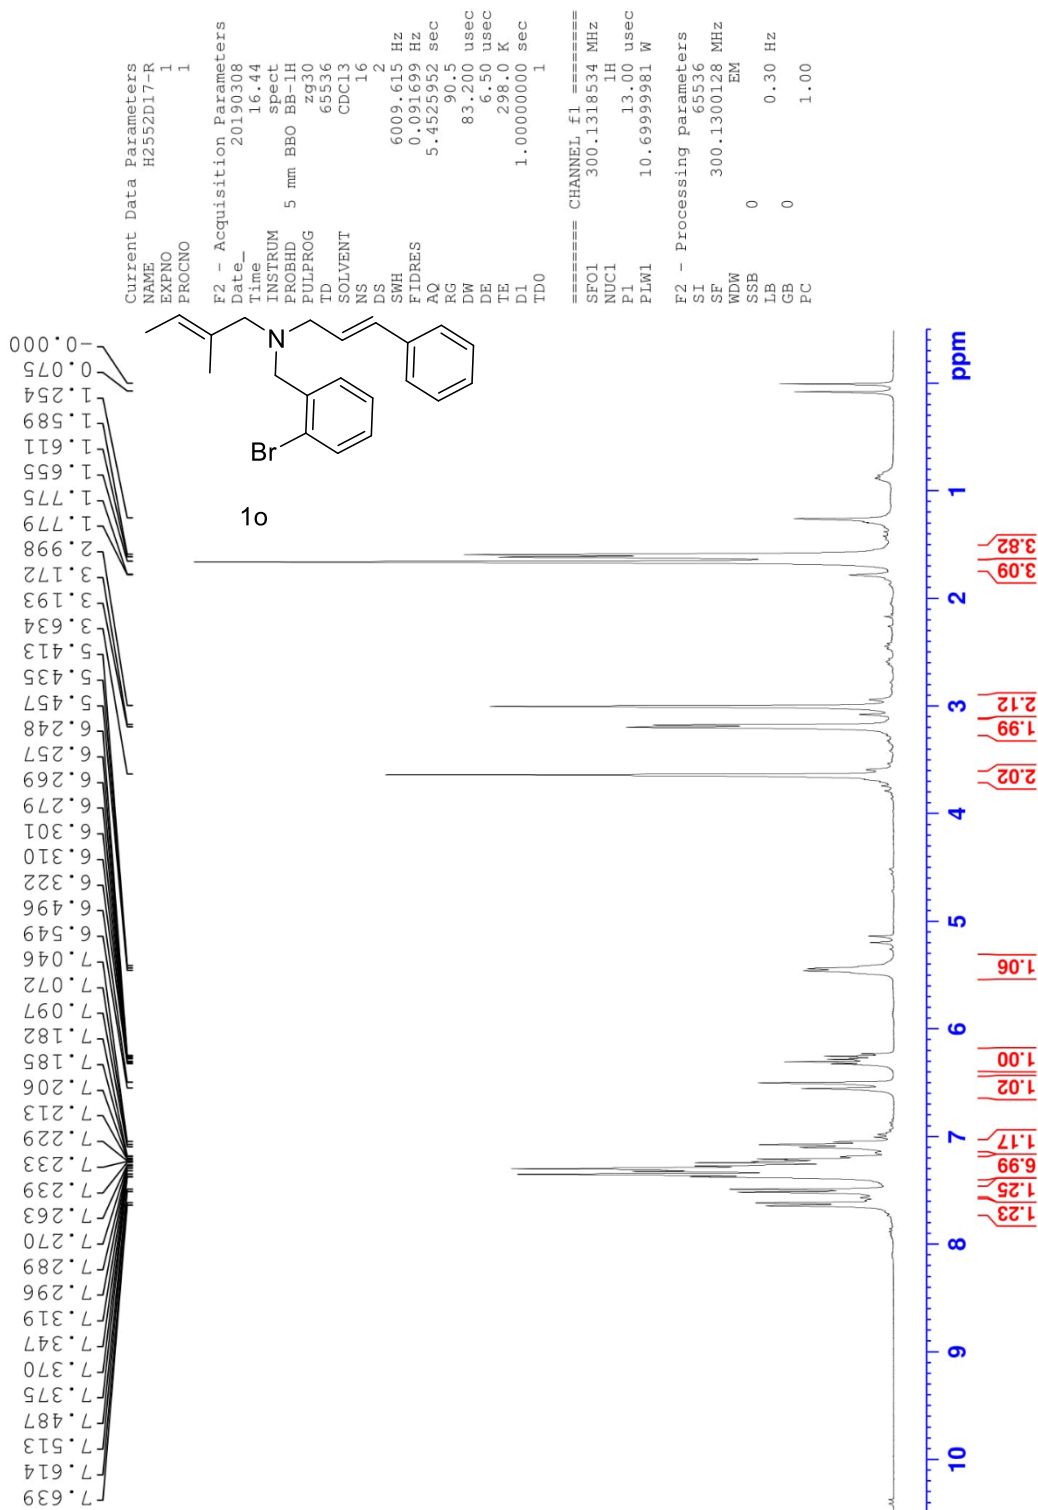

142.15  
139.26  
137.33  
134.02  
132.28  
130.18  
128.52  
128.37  
128.01  
127.84  
127.25  
126.28  
122.02  
100.14

77.47  
77.05  
76.62  
62.75  
62.11  
55.88

14.80  
13.37

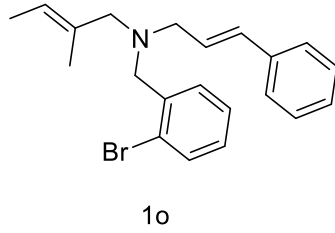

```

Current Data Parameters
NAME          C2552D6
EXPNO         1
PROCNO        1

F2 - Acquisition Parameters
Date_         20180915
Time          14.37
INSTRUM       spect
PROBHD        5 mm BBO BB-1H
PULPROG       zgpg30
TD            65536
SOLVENT       CDCl3
NS            1565
DS            4
SWH           18028.846 Hz
FIDRES        0.275098 Hz
AQ            1.8175317 sec
RG            575
DW            27.733 usec
DE            6.50 usec
TE            300.0 K
D1            2.00000000 sec
D11           0.03000000 sec
TD0           1

===== CHANNEL f1 =====
SFO1          75.4752949 MHz
NUC1          13C
P1            9.47 usec
PLW1          38.00000000 W

===== CHANNEL f2 =====
SFO2          300.1312005 MHz
NUC2          1H
PCPDPRG[2]   waltz16
PCPD2         90.00 usec
PLW2          10.69999981 W
PLW12         0.22325000 W
PLW13         0.11229000 W

F2 - Processing parameters
SI            32768
SF            75.4677485 MHz
WDW           EM
SSB           0
LB            1.00 Hz
GB            0
PC            1.40
  
```

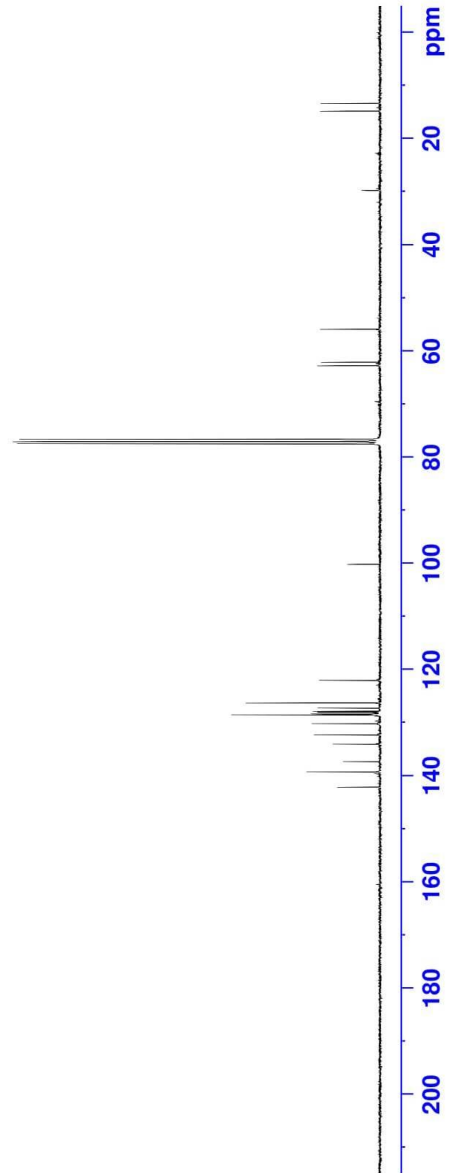

7.806  
7.780  
7.555  
7.533  
7.333  
7.310  
7.285  
7.257  
7.944  
6.918  
6.893  
5.959  
5.938  
5.925  
5.918  
5.904  
5.881  
5.867  
5.860  
5.847  
5.826  
5.452  
5.430  
5.408  
5.385  
5.215  
5.158  
5.153  
5.139  
5.105  
3.516  
3.039  
3.018  
2.939  
1.624  
1.601  
1.578  
1.255

```

Current Data Parameters
NAME      H2552E18
EXPNO    1
PROCNO   1

F2 - Acquisition Parameters
Date_    20181009
Time     17.08
INSTRUM spect
PROBHD   5 mm BBO BB-1H
PULPROG zg30
TD       65536
SOLVENT  CDCl3
NS       16
DS       2
SWH      6009.615 Hz
FIDRES   0.091699 Hz
AQ       5.4525952 sec
RG       144
DW       83.200 usec
DE       6.50 usec
TE       298.0 K
D1       1.00000000 sec
TD0      1

===== CHANNEL f1 =====
SFO1    300.1318534 MHz
NUC1    1H
P1      13.00 usec
PLW1    10.69999981 W

F2 - Processing parameters
SI      65536
SF      300.1300076 MHz
WDW     EM
SSB     0
LB      0.30 Hz
GB      0
PC      1.00
  
```

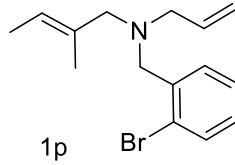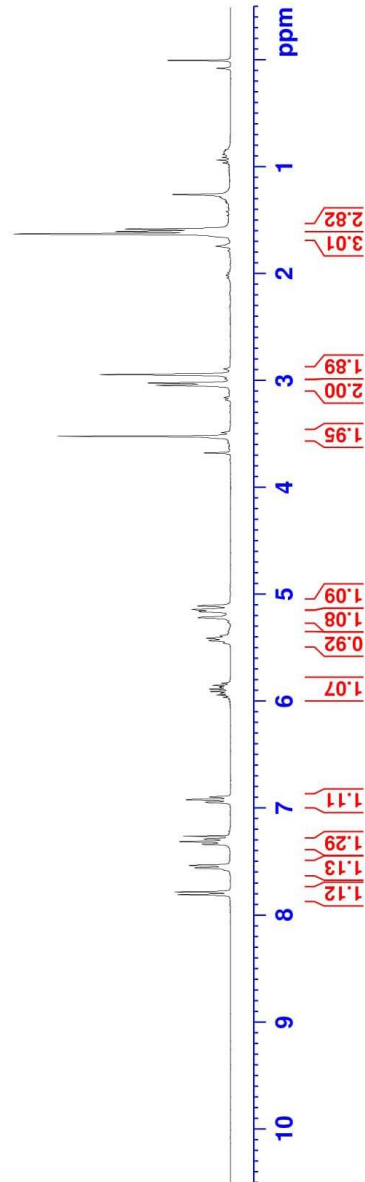



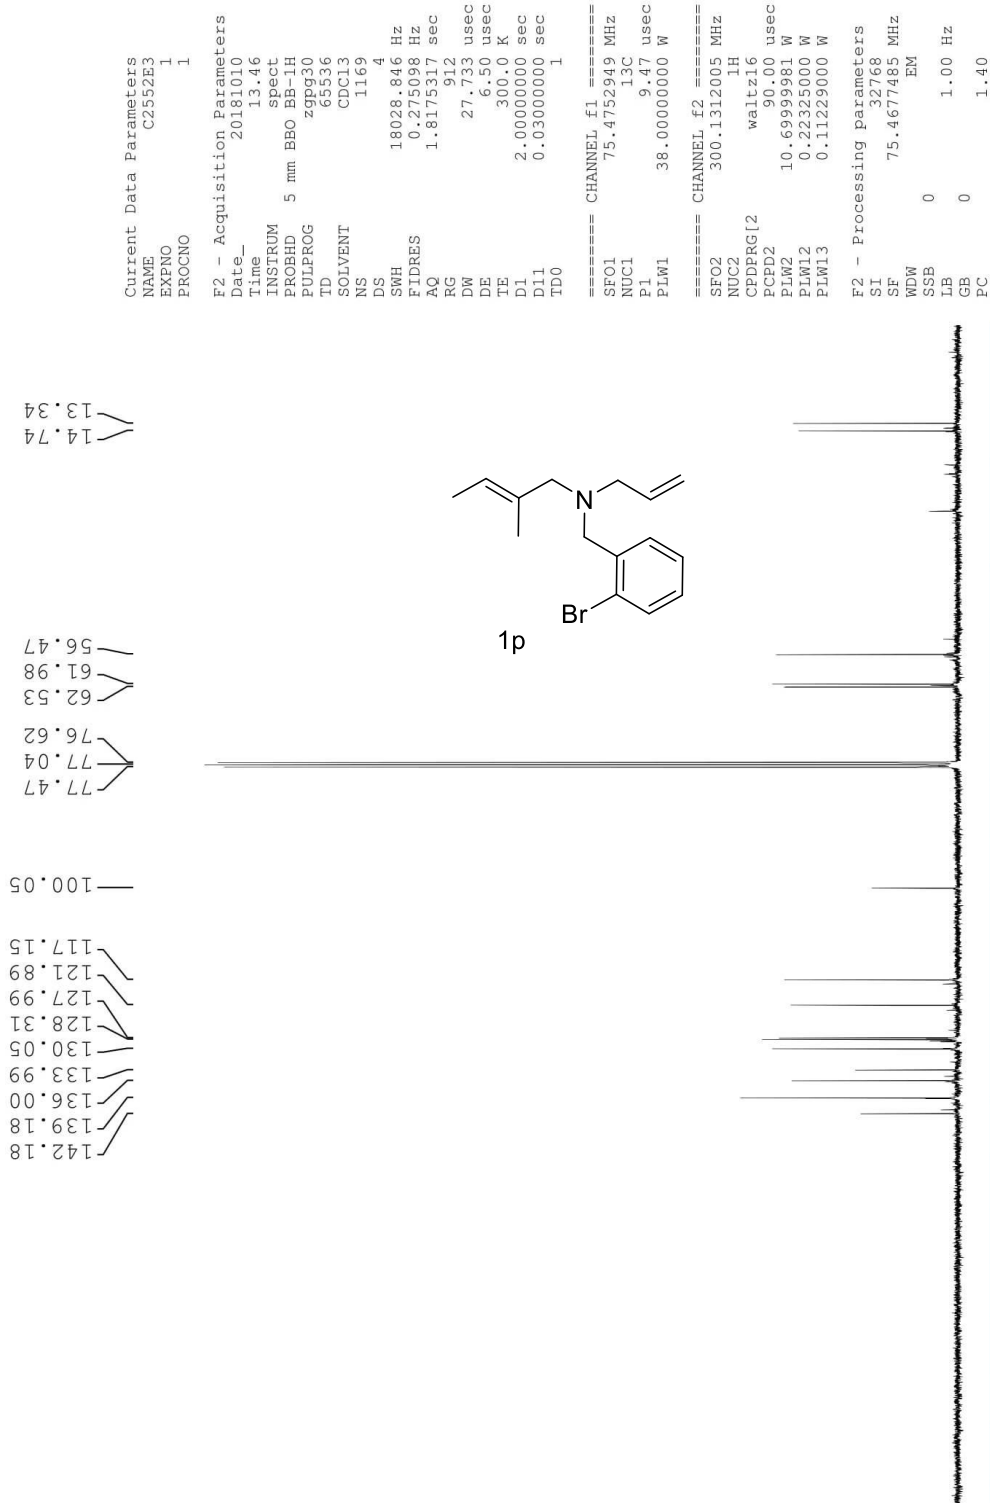

7.581  
 7.576  
 7.561  
 7.551  
 7.253  
 7.223  
 7.197  
 7.174  
 7.123  
 7.100  
 7.078  
 6.985  
 6.956  
 6.518  
 6.489  
 5.374  
 5.368  
 5.351  
 5.346  
 5.296  
 4.481  
 3.865  
 2.222  
 1.633  
 1.618  
 1.571  
 0.071  
 -0.000

Current Data Parameters  
 NAME H3339A11-R  
 EXPNO 1  
 PROCNO 1  
 F2 - Acquisition Parameters  
 Date\_ 20190404  
 Time 14.56  
 INSTRUM spect  
 PROBD 5 mm BBO BB-1H  
 PULPROG zg30  
 ID 65536  
 SOLVENT CDCl3  
 NS 16  
 DS 2  
 SWH 6009.615 Hz  
 FIDRES 0.091699 Hz  
 AQ 5.4525952 sec  
 RG 287  
 DW 83.200 usec  
 DE 6.50 usec  
 TE 298.0 K  
 D1 1.00000000 sec  
 TD0 1  
 ===== CHANNEL f1 =====  
 SFO1 300.1318534 MHz  
 NUC1 1H  
 P1 13.00 usec  
 PLW1 10.6999981 W  
 F2 - Processing Parameters  
 SI 65536  
 SF 300.1300086 MHz  
 WDW EM  
 SSB 0  
 LB 0  
 GB 0  
 PC 1.00

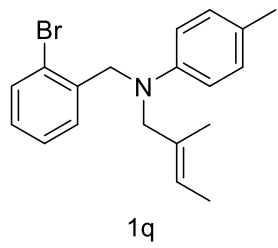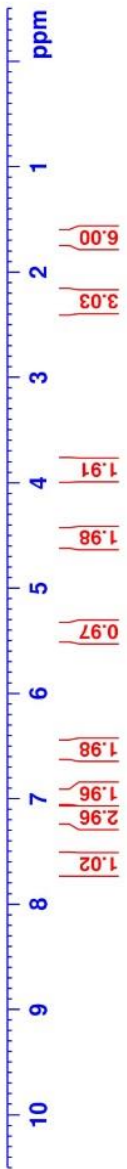

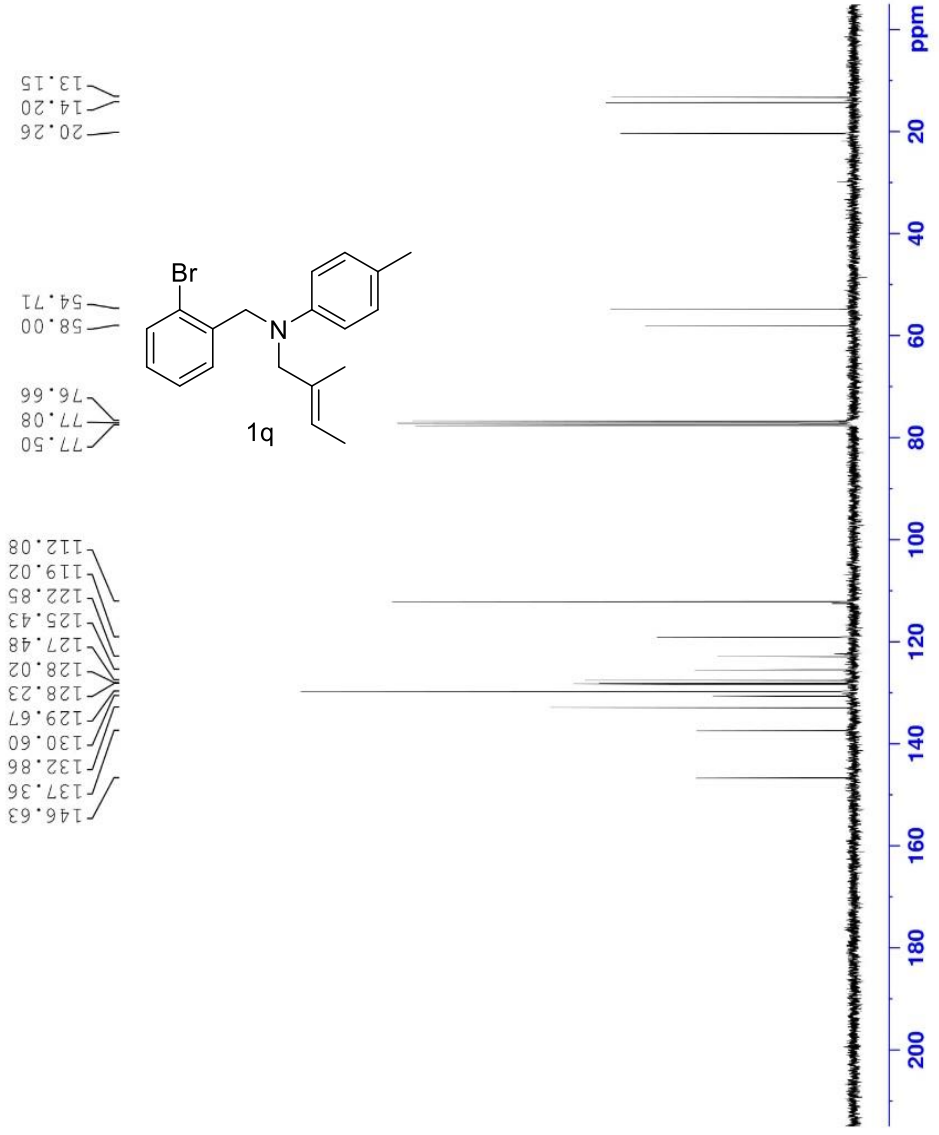

```

Current Data Parameters
NAME          C3339B6
EXPNO         1
PROCNO        1

F2 - Acquisition Parameters
Date_         20190508
Time          9.43
INSTRUM       spect
PROBHD        5 mm BBO BB-1H
PULPROG       zgpg30
TD            65536
SOLVENT       CDCl3
NS            235
DS            4
SWH           18028.846 Hz
FIDRES        0.275098 Hz
AQ            1.8175317 sec
RG            645
DM            27.733 usec
DE            6.50 usec
TE            300.0 K
D1            2.00000000 sec
D11           0.03000000 sec
TD0           1

===== CHANNEL f1 =====
SF01          75.4752949 MHz
NUC1          13C
P1            9.47 usec
PLW1          38.00000000 W

===== CHANNEL f2 =====
SF02          300.1312005 MHz
NUC2          1H
PCPDPRG2      waltz16
PCPD2         90.00 usec
PLW2          10.69999981 W
PLW12         0.22325000 W
PLW13         0.11229000 W

F2 - Processing parameters
SI            32768
SF            75.4677485 MHz
WDW           EM
SSB           0
LB            1.00 Hz
GB            0
PC            1.40
  
```

Current Data Parameters  
 NAME H3339C20  
 EXPNO 1  
 PROCNO 1

F2 - Acquisition Parameters  
 Date\_ 20190619  
 Time 11.46  
 INSTRUM spect  
 PROBHD 5 mm BBO BB-1H  
 PULPROG zg30  
 TD 65536  
 SOLVENT CDCl3  
 NS 16  
 DS 2  
 SWH 6009.615 Hz  
 FIDRES 0.091699 Hz  
 AQ 5.4525952 sec  
 RG 181  
 DW 83.200 usec  
 DE 6.50 usec  
 TE 298.0 K  
 DI 1.0000000 sec  
 TDO 1

==== CHANNEL f1 =====  
 SF01 300.1318534 MHz  
 NUC1 1H  
 P1 13.00 usec  
 PLW1 10.6999981 W

F2 - Processing parameters  
 SI 65536  
 SF 300.1300093 MHz  
 WDW EM  
 SSB 0  
 LB 0.30 Hz  
 GB 0  
 PC 1.00

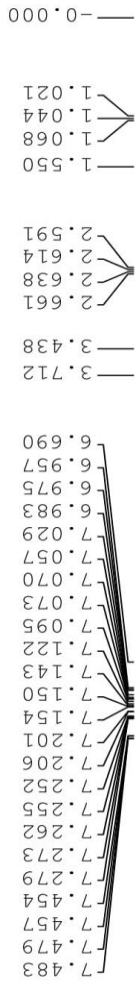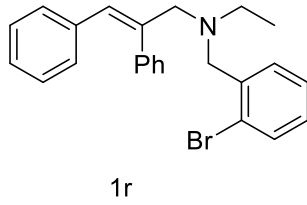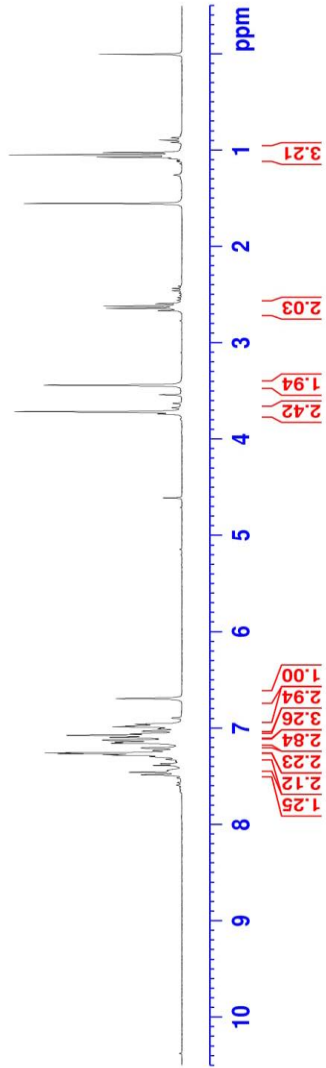

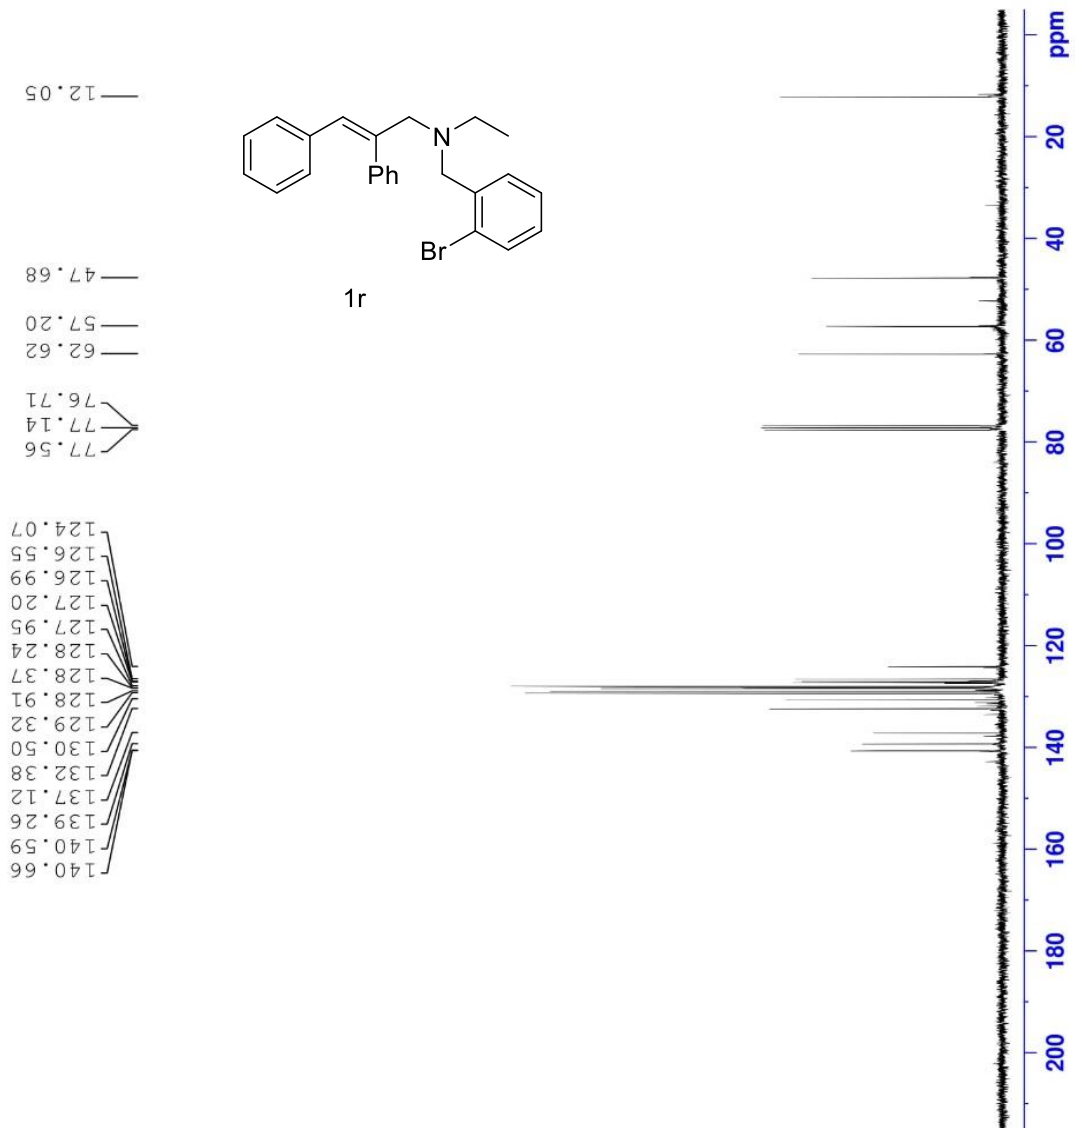

```

Current Data Parameters
NAME          C3339B9
EXPNO        1
PROCNO       1

F2 - Acquisition Parameters
Date_        20190620
Time         12.26
INSTRUM      spect
PROBHD       5 mm BBO BB-1H
PULPROG      zgpg30
TD           65536
SOLVENT      CDCl3
NS           111
DS           4
SWH          18028.846 Hz
FIDRES       0.275098 Hz
AQ           1.8175317 sec
RG           456
DE           27.733 usec
TE           300.0 K
D1           2.00000000 sec
DI1          0.03000000 sec
TD0          1

===== CHANNEL f1 =====
SFO1         75.4752949 MHz
NUC1         13C
P1           9.47 usec
PLW1        38.00000000 W

===== CHANNEL f2 =====
SFO2         300.1312005 MHz
NUC2         1H
CPDPRG[2]    waltz16
PCPD2        90.00 usec
PLW2         10.69999981 W
PLW12        0.22325000 W
PLW13        0.11229000 W

F2 - Processing parameters
SI           32768
SF           75.4677485 MHz
WDW          EM
SSB          0
LB           1.00 Hz
GB           0
PC           1.40
  
```

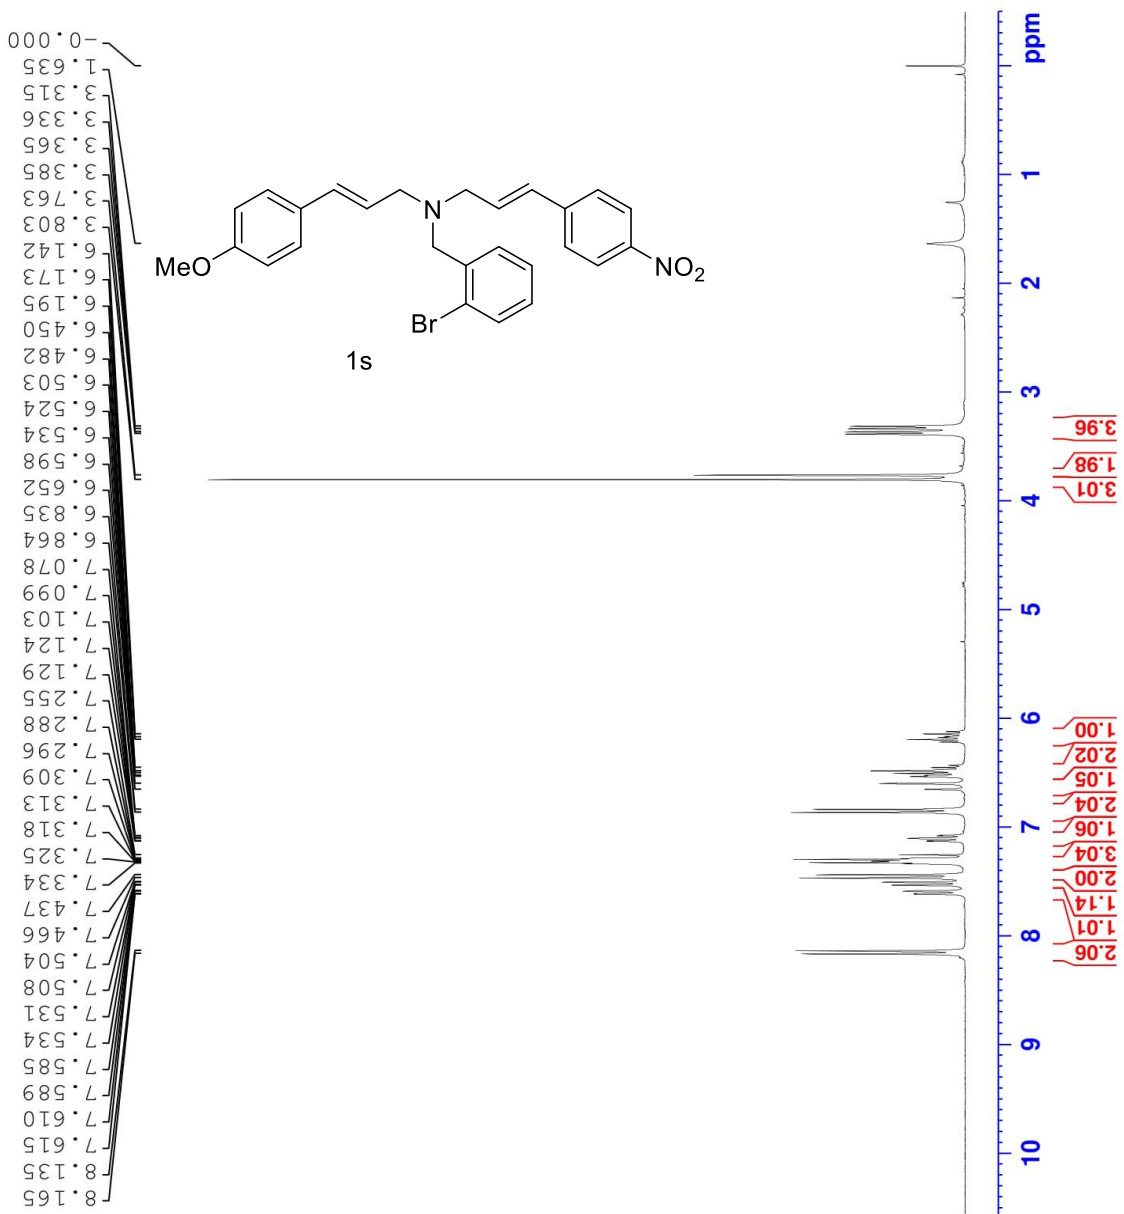

Current Data Parameters  
 NAME H3339A11  
 EXPNO 1  
 PROCNO 1

F2 - Acquisition Parameters  
 Date\_ 20190401  
 Time\_ 16.15  
 INSTRUM spect  
 PROBHD 5 mm BBO BB-1H  
 PULPROG zg30  
 TD 65536  
 SOLVENT CDCl3  
 NS 16  
 DS 2  
 SWH 6009.615 Hz  
 FIDRES 0.091699 Hz  
 AQ 5.4525952 sec  
 RG 114  
 DW 83.200 usec  
 DE 6.50 usec  
 TE 298.0 K  
 DL 1.0000000 sec  
 TD0 1

===== CHANNEL f1 =====  
 SF01 300.1318534 MHz  
 NUC1 1H  
 P1 13.00 usec  
 PLW1 10.6999981 W

F2 - Processing parameters  
 SI 65536  
 SF 300.1300083 MHz  
 WDW EM  
 SSB 0  
 LB 0.30 Hz  
 GB 0  
 FC 1.00

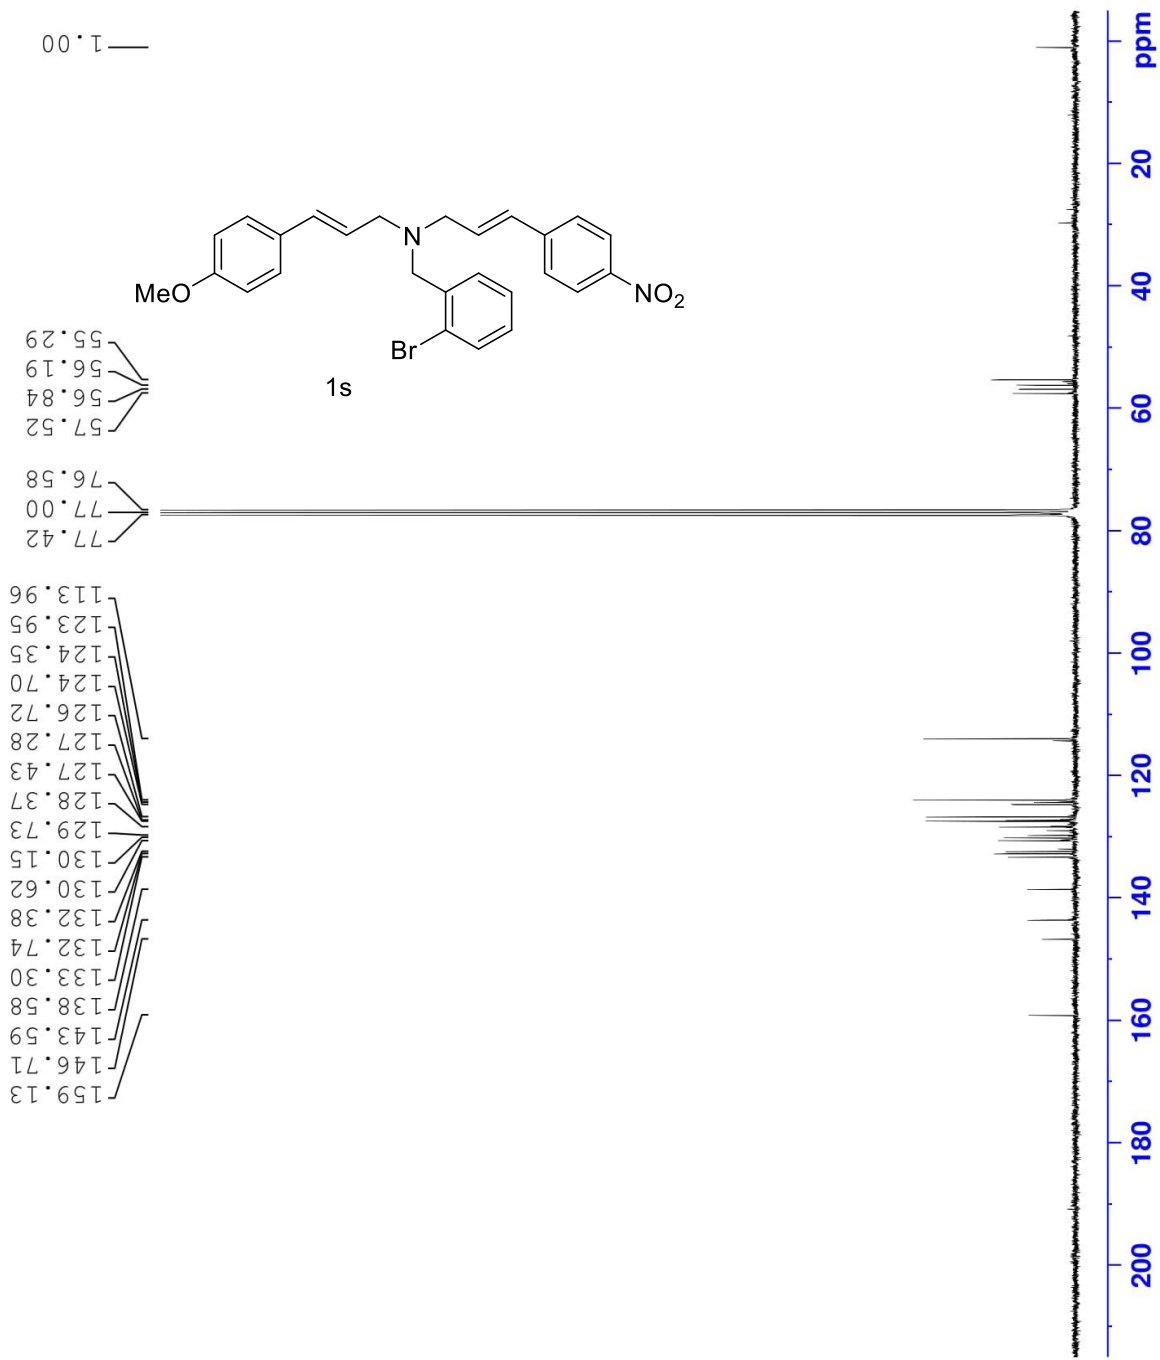

Current Data Parameters  
 NAME C3339C1  
 EXPNO 1  
 PROCNO 1

F2 - Acquisition Parameters  
 Date\_ 20190626  
 Time 19.39  
 INSTRUM spect  
 PROBHD 5 mm BBO BB-IH  
 PULPROG zgpg30  
 TD 65536  
 SOLVENT CDCl3  
 NS 2048  
 DS 4  
 SWH 18028.846 Hz  
 FIDRES 0.275098 Hz  
 AQ 1.8175317 sec  
 RG 645  
 DW 27.733 usec  
 DE 6.50 usec  
 TE 300.0 K  
 D1 2.00000000 sec  
 D11 0.03000000 sec  
 TD0 1

==== CHANNEL f1 =====  
 SFO1 75.4752949 MHz  
 NUC1 13C  
 P1 9.47 usec  
 PLW1 38.00000000 W

==== CHANNEL f2 =====  
 SFO2 300.1312005 MHz  
 NUC2 1H  
 CPDPRG2 waltz16  
 ECPD2 90.00 usec  
 PLW2 10.69999981 W  
 PLW12 0.22325000 W  
 PLW13 0.11229000 W

F2 - Processing parameters  
 SI 32768  
 SF 75.4677516 MHz  
 EM  
 WDW 0  
 SSB 0  
 LB 1.00 Hz  
 GB 0  
 PC 1.40

# Cyclization

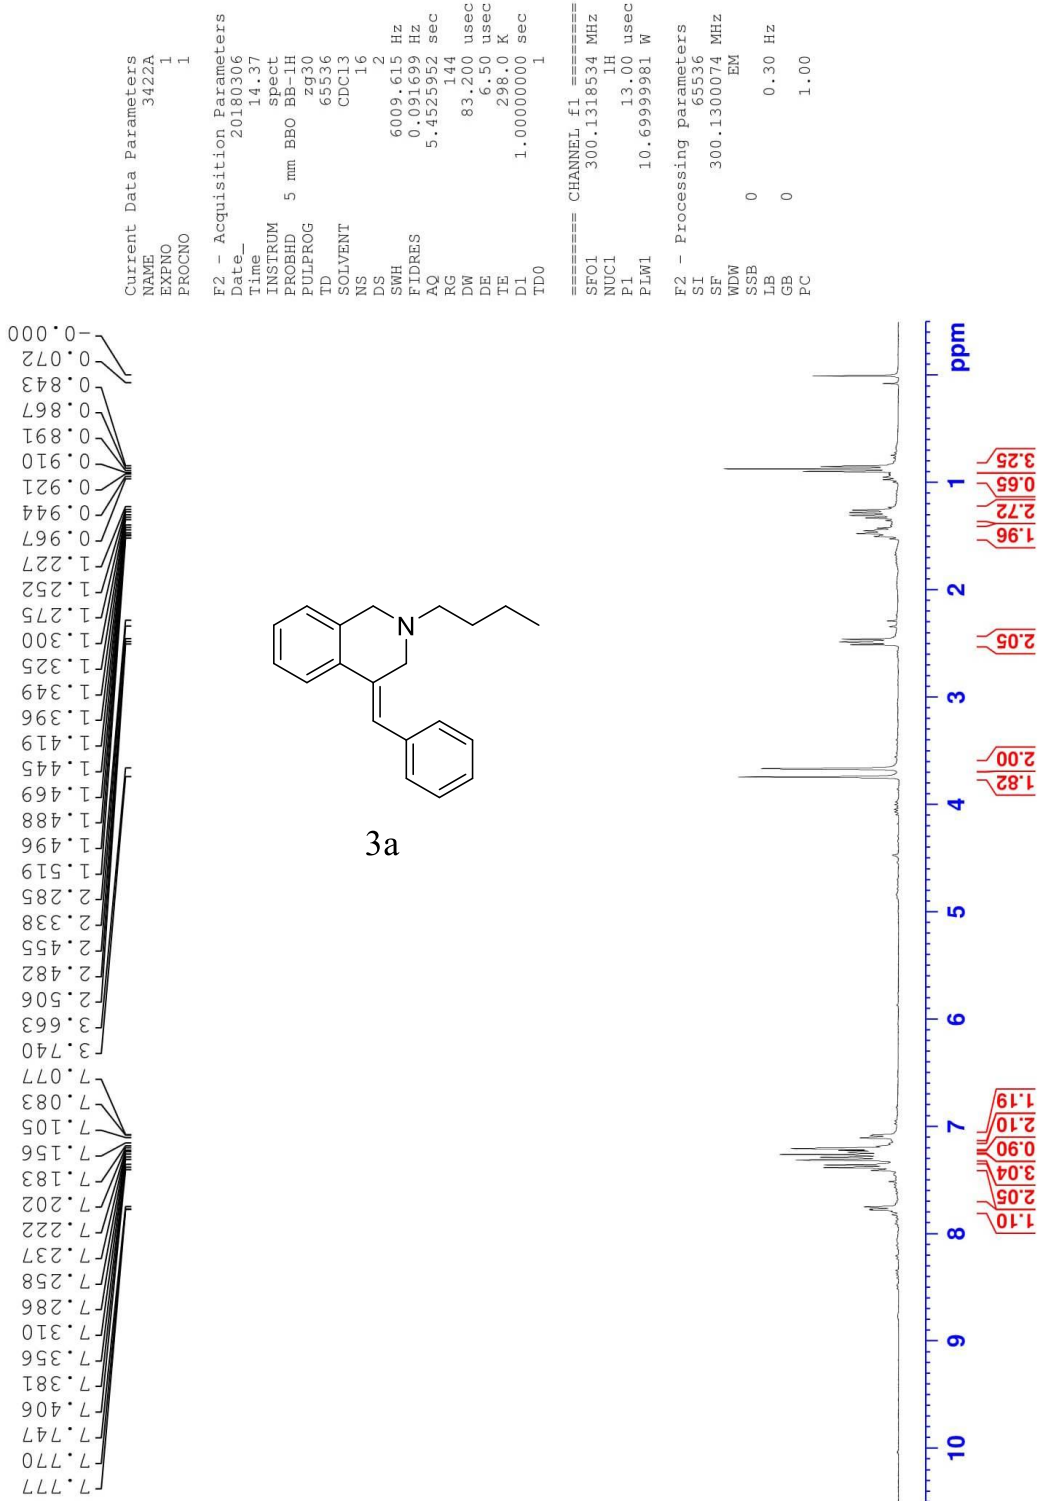



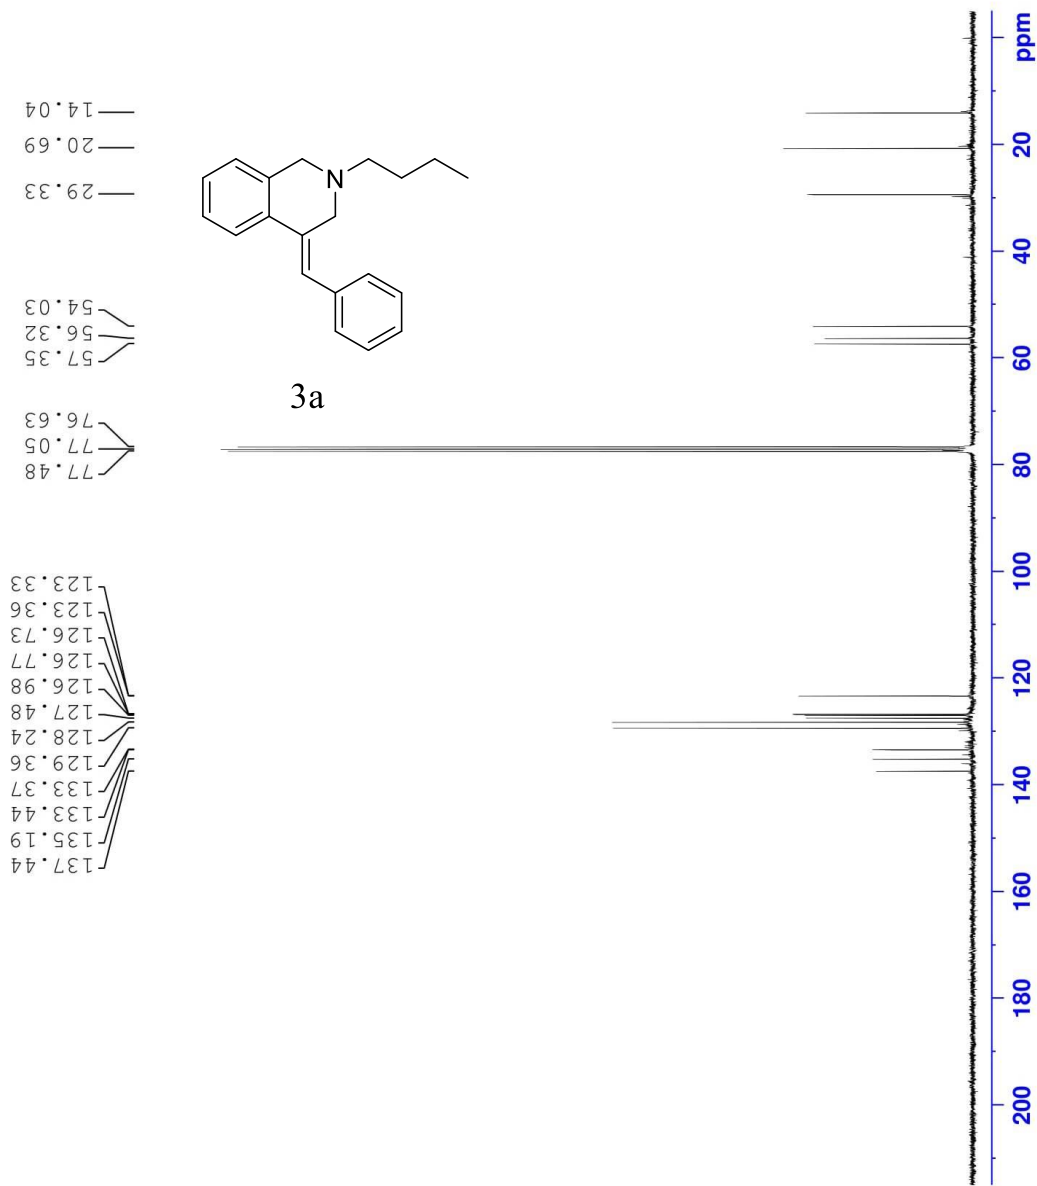

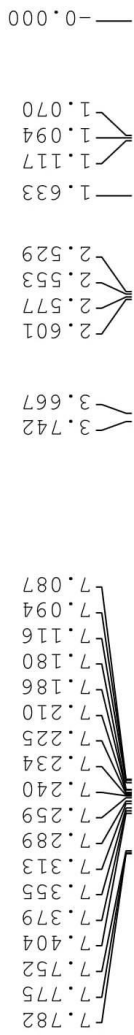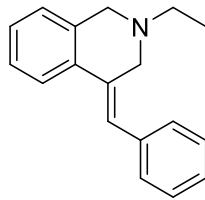

9b

```

Current Data Parameters
NAME      H2552C12
EXPNO    1
PROCNO   1

F2 - Acquisition Parameters
Date_    20180818
Time     16.37
INSTRUM  spect
PROBHD   5 mm BBO BB-1H
PULPROG  zg30
TD       65536
SOLVENT  CDCl3
NS       16
DS       2
SWH      6009.615 Hz
FIDRES   0.091699 Hz
AQ       5.4525952 sec
RG       228
DW       83.200 usec
DE       6.50 usec
TE       298.0 K
D1       1.00000000 sec
TD0      1

===== CHANNEL f1 =====
SFO1    300.1318534 MHz
NUC1    1H
P1      13.00 usec
PLW1    10.69999981 W

F2 - Processing parameters
SI      65536
SF      300.1300070 MHz
WDW     EM
SSB     0
LB      0.30 Hz
GB      0
PC      1.00
  
```

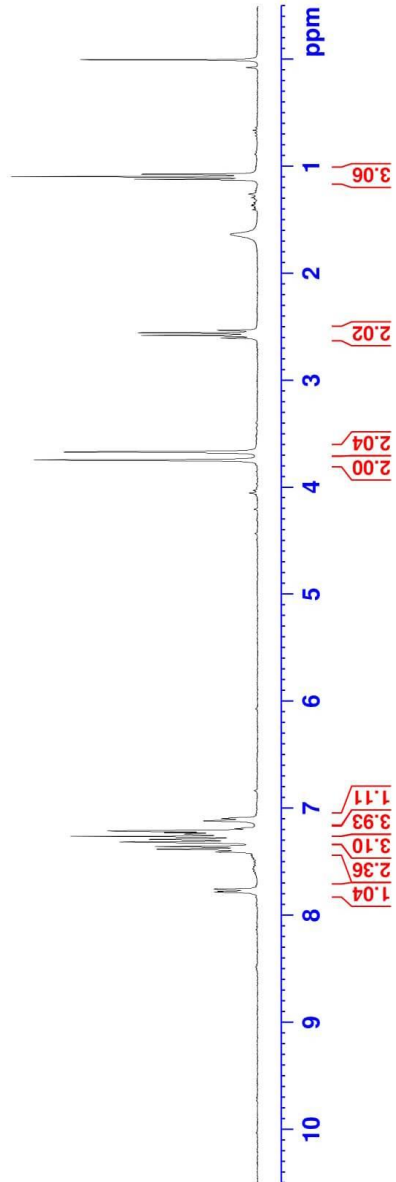

```

Current Data Parameters
NAME          3581A
EXPNO         1
PROCNO        1

F2 - Acquisition Parameters
Date_         20180412
Time         20.31
INSTRUM      spect
PROBHD       5 mm BBO BB-1H
PULPROG      zgpg30
ID           65536
SOLVENT      CDCl3
NS           3072
DS           4
SWH          18028.846 Hz
FIDRES       0.275098 Hz
AQ           1.8175317 sec
RG           912
DW           27.733 usec
DE           6.50 usec
TE           300.0 K
D1           2.00000000 sec
D11          0.03000000 sec
TD0          1

===== CHANNEL f1 =====
SF01         75.4752949 MHz
NUC1         13C
P1           9.47 usec
PLW1         38.00000000 W

===== CHANNEL f2 =====
SF02         300.1312005 MHz
NUC2         1H
CPDPRG[2]   waltz16
PCPD2       90.00 usec
PLW2        10.69999981 W
PLW12       0.22325000 W
PLW13       0.11229000 W

F2 - Processing parameters
SI           32768
SF           75.4677485 MHz
WDW          EM
SSB          0
LB           1.00 Hz
GB           0
PC           1.40

```

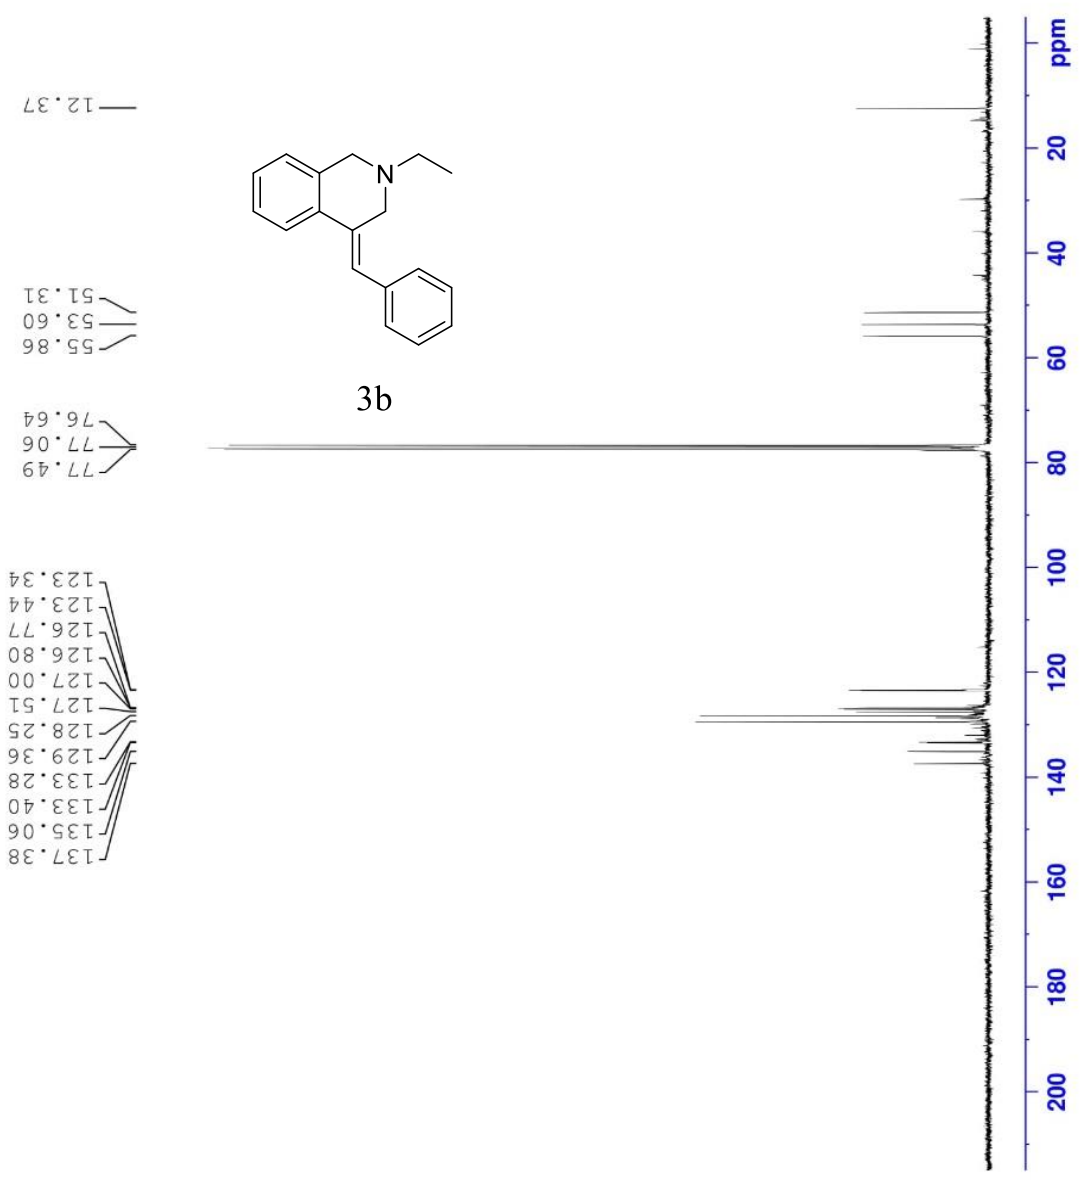

7.794  
7.766  
7.755  
7.746  
7.737  
7.724  
7.705  
7.403  
7.397  
7.378  
7.354  
7.320  
7.297  
7.281  
7.277  
7.254  
7.223  
7.218  
7.205  
7.194  
7.188  
7.170  
7.159  
7.121  
7.107  
7.102  
7.092  
3.860  
3.674  
1.844  
1.662  
1.121  
0.855  
0.850  
0.839  
0.073  
-0.000

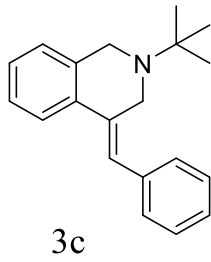

```

Current Data Parameters
NAME      3422B2_HI
EXPNO     1
PROCNO    1

F2 - Acquisition Parameters
Date_     20180321
Time      15.24
INSTRUM   spect
PROBHD    5 mm BBO BB-1H
PULPROG   zg30
TD         65536
SOLVENT   CDCl3
NS         16
DS         2
SWH        6009.615 Hz
FIDRES     0.091699 Hz
AQ         5.4525952 sec
RG         128
DW         83.200 usec
DE         6.50 usec
TE         298.0 K
D1         1.0000000 sec
TD0        1

===== CHANNEL f1 =====
SFO1      300.1318534 MHz
NUC1      1H
P1        13.00 usec
PLW1      10.69999981 W

F2 - Processing parameters
SI         65536
SF         300.1300082 MHz
WDW        EM
SSB        0
LB         0.30 Hz
GB         0
PC         1.00
  
```

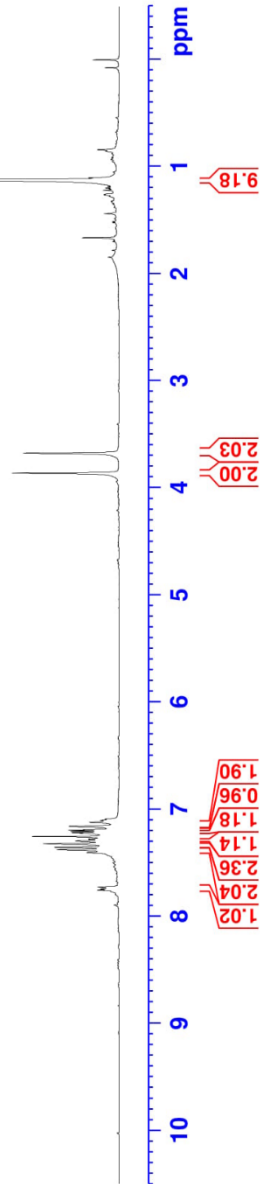

137.61  
136.49  
135.08  
133.59  
129.24  
128.23  
127.39  
127.07  
126.65  
126.47  
123.47  
122.60

77.47  
77.04  
76.62

54.23  
49.83  
46.89

25.85

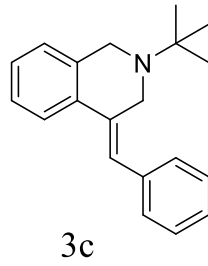

```

Current Data Parameters
NAME          3423E
EXPNO        1
PROCNO       1

F2 - Acquisition Parameters
Date_        20180323
Time         0
INSTRUM      spect
PROBHD       5 mm BBO BB-1H
PULPROG      zgpg30
TD           65536
SOLVENT      CDCl3
NS           3072
DS           4
SWH          18028.846 Hz
FIDRES       0.275098 Hz
AQ           1.8175317 sec
RG           1030
DW           27.733 usec
DE           6.50 usec
TE           300.0 K
D1           2.0000000 sec
D11          0.0300000 sec
TD0          1

===== CHANNEL f1 =====
SFO1         75.4752949 MHz
NUC1         13C
P1           9.47 usec
PLW1         38.0000000 W

===== CHANNEL f2 =====
SFO2         300.1312005 MHz
NUC2         1H
CPDPRG[2]   waitz16
PCPD2        90.00 usec
PLW2         10.69999981 W
PLW12        0.22325000 W
PLW13        0.11229000 W

F2 - Processing parameters
SI           32768
SF           75.4677485 MHz
WDW          EM
SSB          0
LB           1.00 Hz
GB           0
PC           1.40
  
```

200 180 160 140 120 100 80 60 40 20 ppm

Current Data Parameters  
 NAME 3642E  
 EXPNO 1  
 PROCNO 1

F2 - Acquisition Parameters  
 Date\_ 20180426  
 Time 17.19  
 INSTRUM spect  
 PROBHD 5 mm BBO BB-1H  
 PULPROG zg30  
 TD 65536  
 SOLVENT CDCl3  
 NS 16  
 DS 2  
 SWH 6009.615 Hz  
 FIDRES 0.091699 Hz  
 AQ 5.4525952 sec  
 RG 161  
 DW 83.200 usec  
 DE 6.50 usec  
 TE 298.0 K  
 D1 1.00000000 sec  
 TD0 1

==== CHANNEL f1 =====  
 SFO1 300.1318534 MHz  
 NUC1 1H  
 P1 13.00 usec  
 PLW1 10.69999981 W

F2 - Processing parameters  
 SI 65536  
 SF 300.1300079 MHz  
 WDW EM  
 SSB 0  
 LB 0.30 Hz  
 GB 0  
 PC 1.00

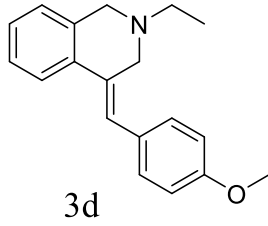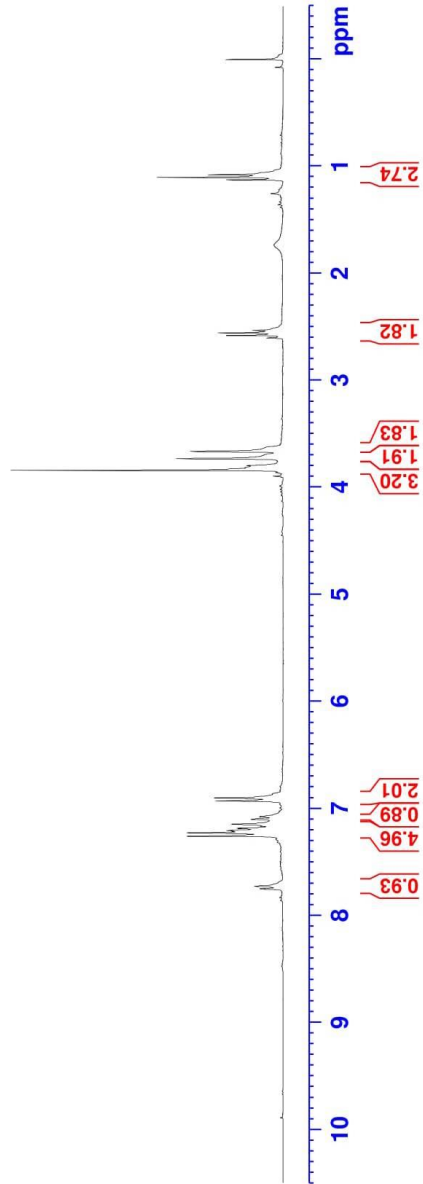

158.45  
 134.80  
 133.65  
 131.82  
 130.64  
 129.97  
 127.20  
 126.95  
 126.74  
 123.18  
 123.11  
 113.70  
 77.48  
 77.05  
 76.63  
 55.84  
 55.29  
 53.67  
 51.30  
 12.40

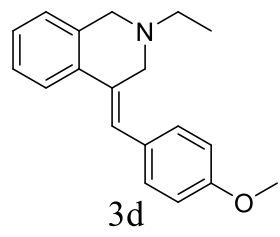

```

Current Data Parameters
NAME      3561MN_C13
EXPNO    1
PROCNO   1

F2 - Acquisition Parameters
Date_    20180405
Time     15.12
INSTRUM spect
PROBHD   5 mm BBO BB-1H
PULPROG zgpg30
TD        65536
SOLVENT  CDCl3
NS        512
DS        4
SMH       18028.846 Hz
FIDRES   0.275098 Hz
AQ        1.8175317 sec
RG        812
DW        27.733 usec
DE        6.50 usec
TE        300.0 K
D1        2.00000000 sec
D11       0.03000000 sec
TD0       1

===== CHANNEL f1 =====
SFO1     75.4752949 MHz
NUC1     13C
P1       9.47 usec
PLW1     38.00000000 W

===== CHANNEL f2 =====
SFO2     300.1312005 MHz
NUC2     1H
PCPDPRG2 waltz16
PCPD2    90.00 usec
PLW2     10.69999981 W
PLW12    0.22325000 W
PLW13    0.11229000 W

F2 - Processing parameters
SI        32768
SF        75.4677485 MHz
WDW       EM
SSB       0
LB        1.00 Hz
GB        0
PC        1.40
  
```

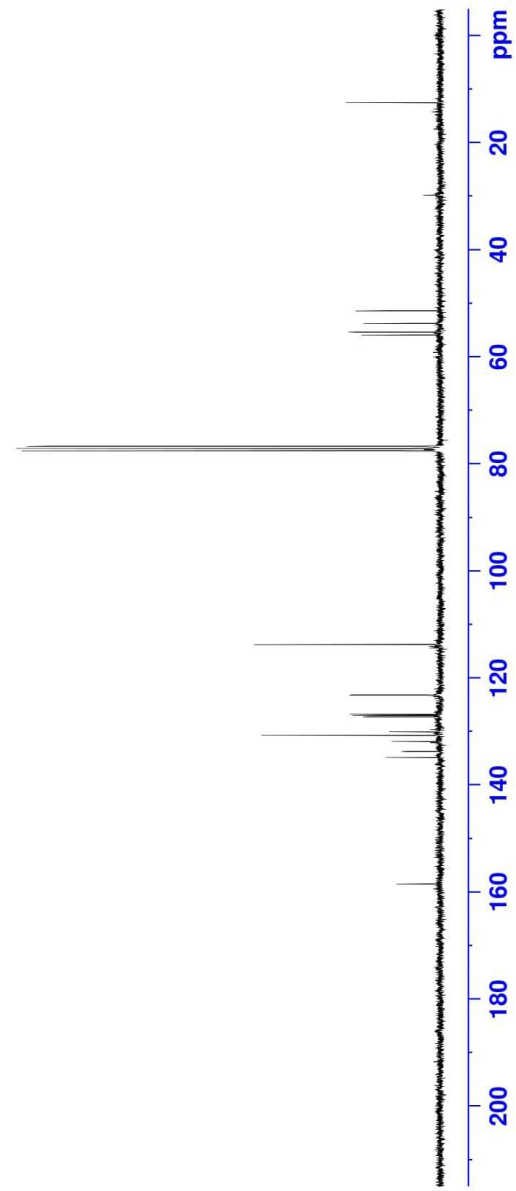

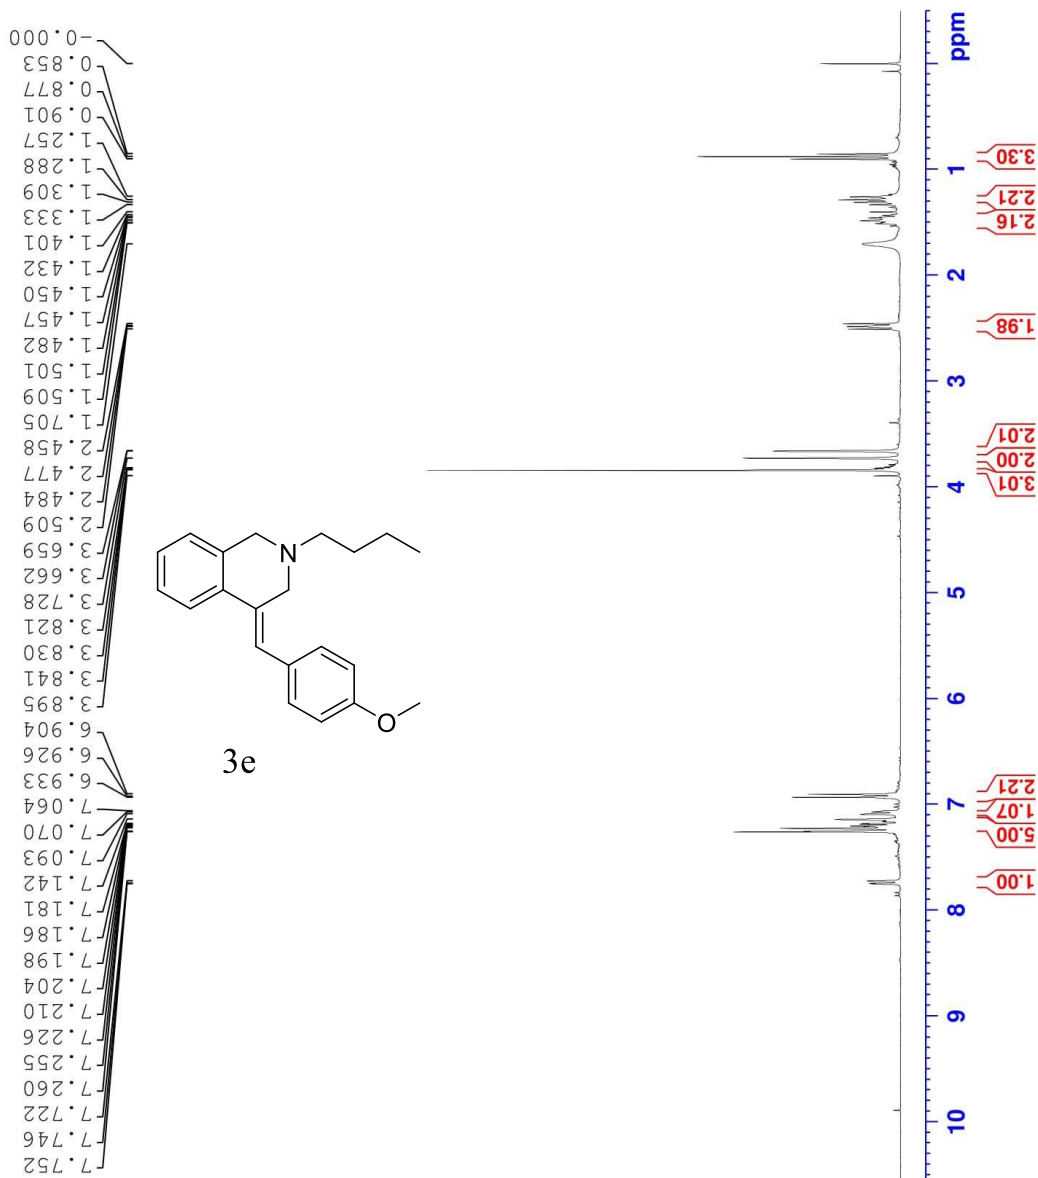



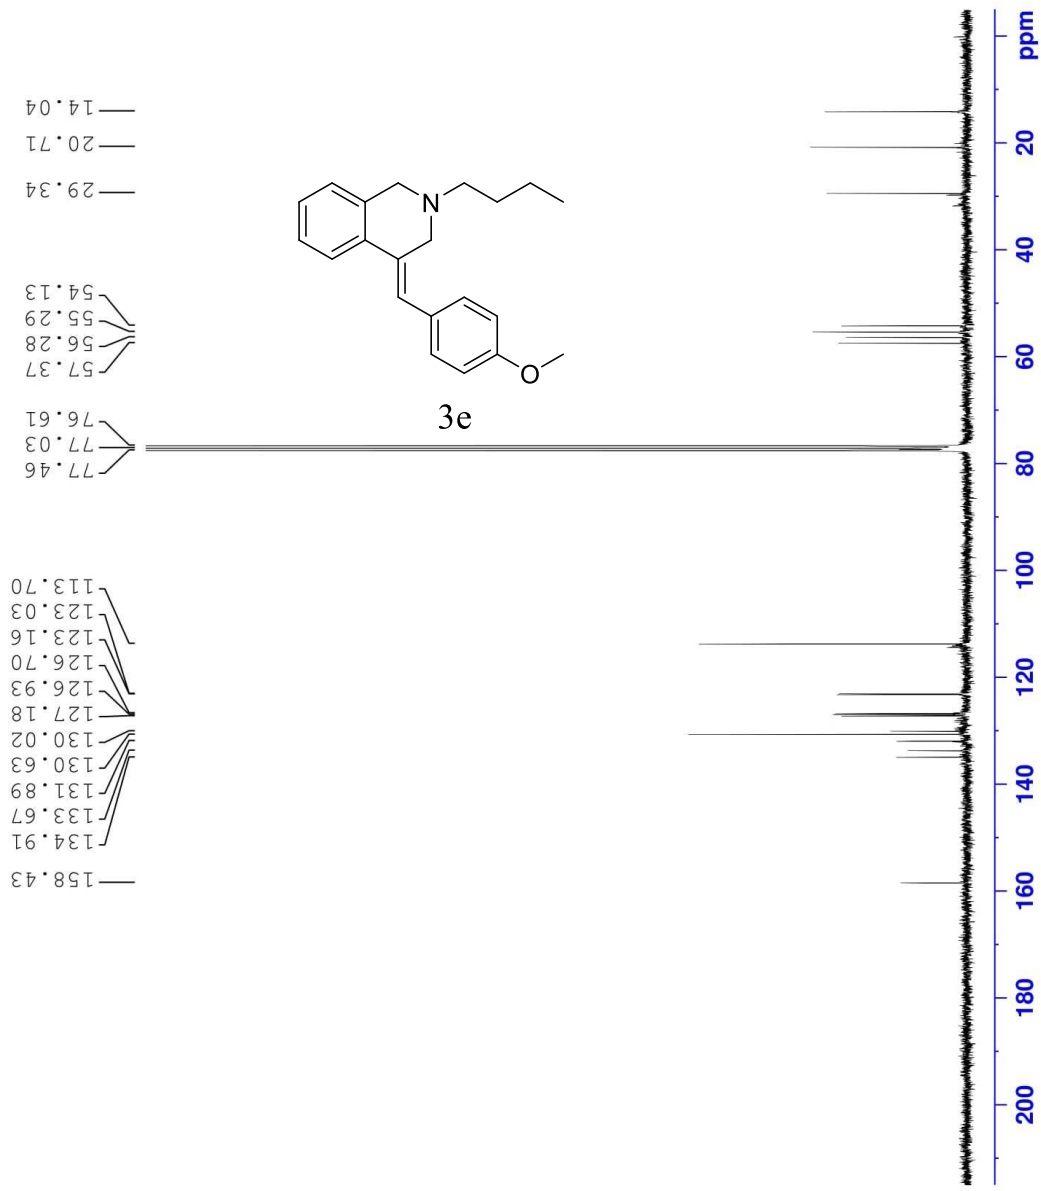

```

Current Data Parameters
NAME          3581F
EXPNO        1
PROCNO       1

F2 - Acquisition Parameters
Date_        20180426
Time         20.43
INSTRUM      spect
PROBHD       5 mm BBO BB-1H
PULPROG      zgpg30
TD           65536
SOLVENT      CDCl3
NS           3072
DS           4
SWH          18028.846 Hz
FIDRES       0.275098 Hz
AQ           1.8175317 sec
RG           812
DW           27.733 usec
DE           6.50 usec
TE           300.0 K
D1           2.00000000 sec
D11          0.03000000 sec
TD0          1

===== CHANNEL f1 =====
SFO1         75.4752949 MHz
NUC1         13C
P1           9.47 usec
PL1         38.00000000 W

===== CHANNEL f2 =====
SFO2         300.1312005 MHz
NUC2         1H
CPDPRG[2]   waltz16
PCPD2        90.00 usec
PLW2         10.69999981 W
PLW12        0.22325000 W
PLW13        0.11229000 W

F2 - Processing parameters
SI           32768
SF           75.4677485 MHz
WDW          EM
SSB          0
LB           1.00 Hz
GB           0
PC           1.40
  
```

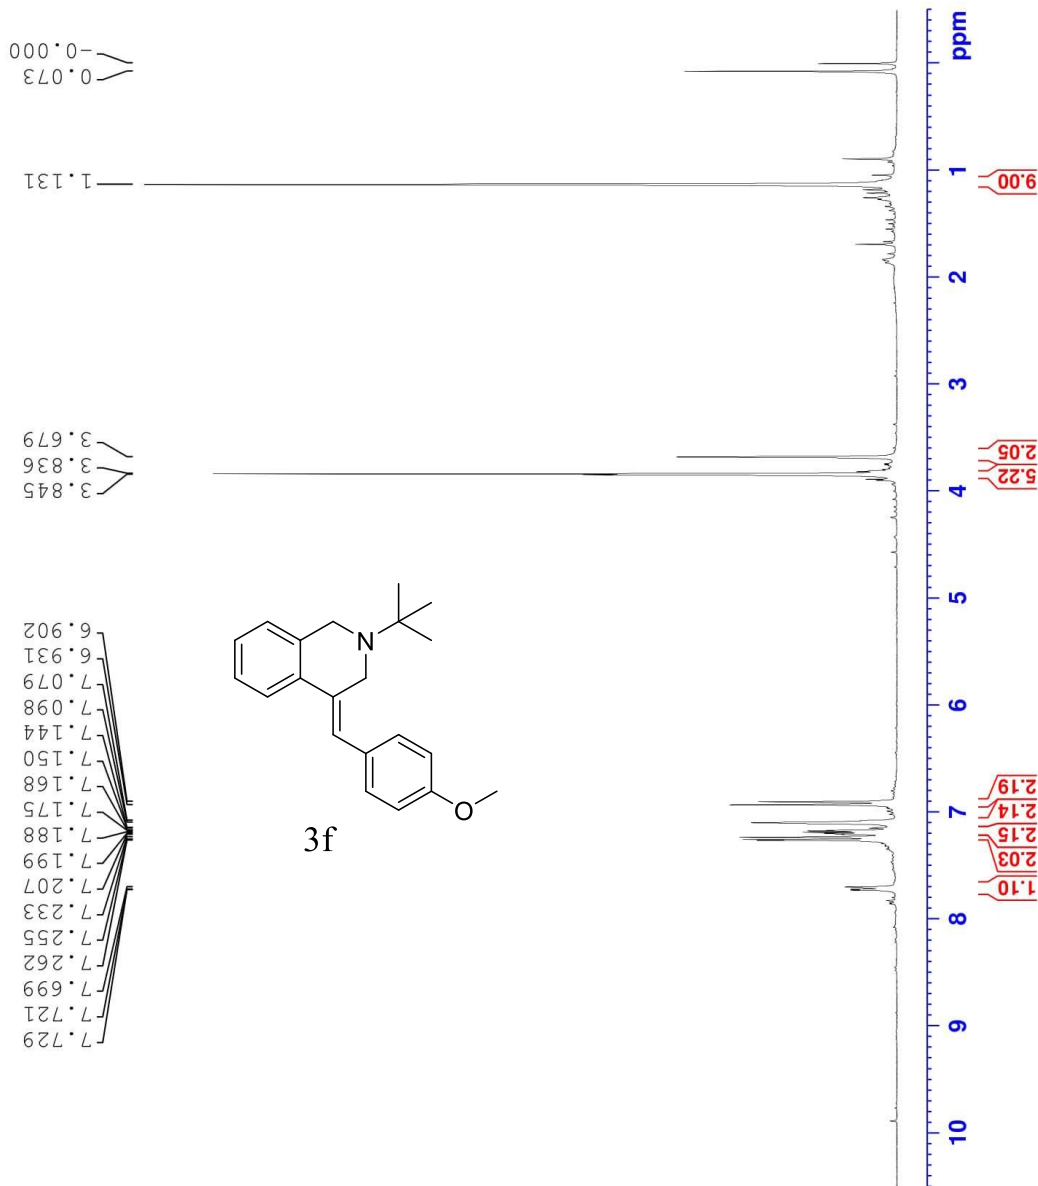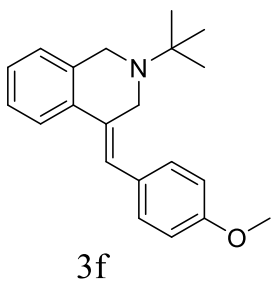

```

Current Data Parameters
NAME          3642L
EXPNO        1
PROCNO       1

F2 - Acquisition Parameters
Date_        20180503
Time         12.06
INSTRUM      spect
PROBHD       5 mm BBO BB-1H
PULPROG      zg30
TD           65536
SOLVENT      CDCl3
NS           16
DS           2
SWH          6009.615 Hz
FIDRES       0.091699 Hz
AQ           5.4525952 sec
RG           114
DE           83.200 usec
TE           6.50 usec
TE           298.0 K
D1           1.00000000 sec
TD0          1

===== CHANNEL f1 =====
SFO1         300.1318534 MHz
NUC1         1H
PI          13.00 usec
PLW1        10.69999981 W

F2 - Processing parameters
SI           65536
SF          300.1300083 MHz
WDW          EM
SSB          0
LB           0.30 Hz
GB           0
PC           1.00
  
```

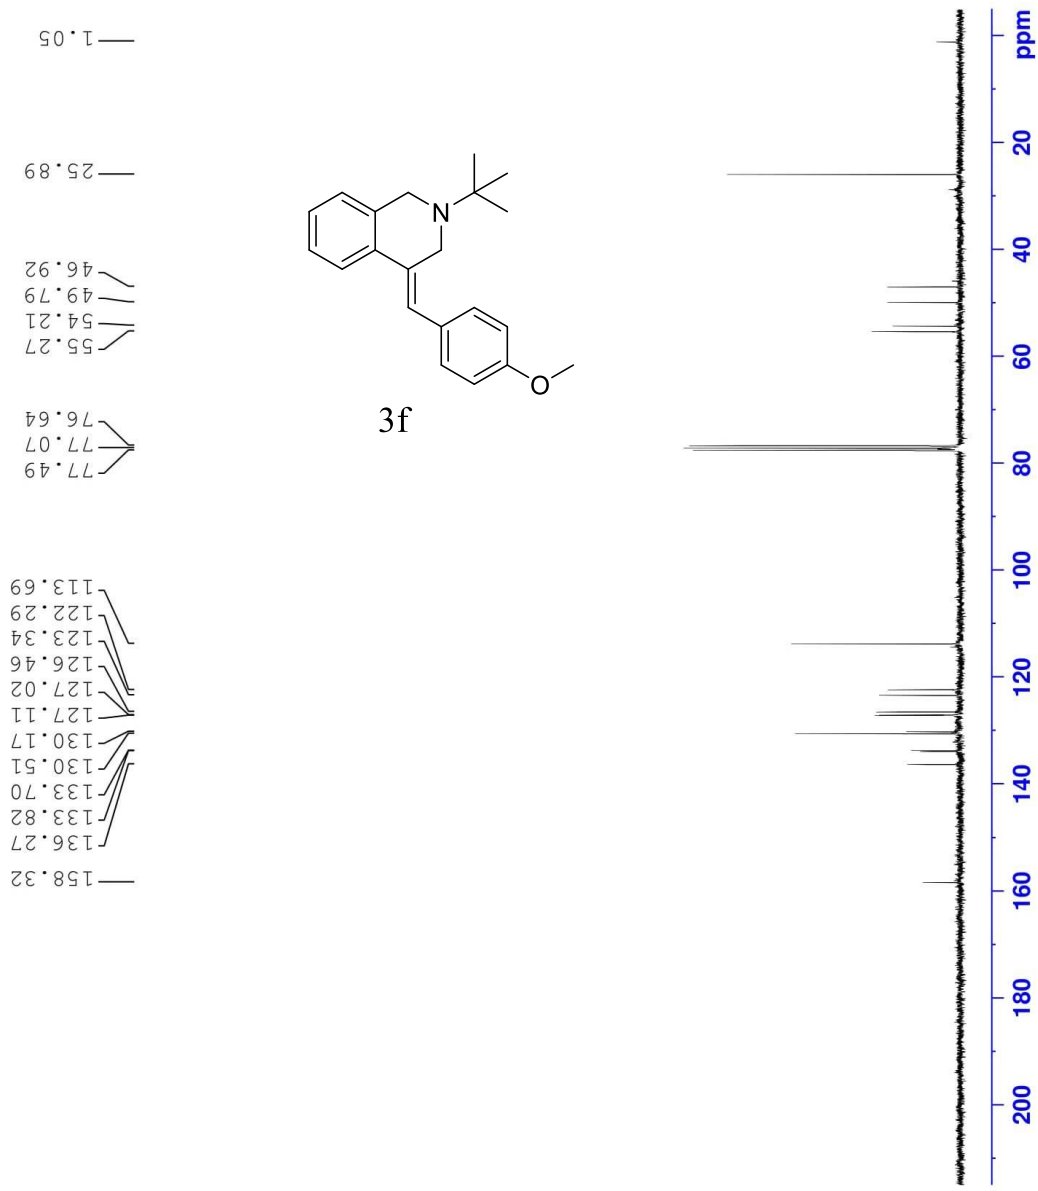

```

Current Data Parameters
NAME          3688E
EXPNO        1
PROCNO       1

F2 - Acquisition Parameters
Date_        20180524
Time         12.35
INSTRUM      spect
PROBHD       5 mm BBO BB-1H
PULPROG      zgpg30
TD           65536
SOLVENT      CDCl3
NS           356
DS           4
SWH          18028.846 Hz
FIDRES       0.275098 Hz
AQ           1.8175317 sec
RG           812
DW           27.733 usec
DE           6.50 usec
TE           300.0 K
D1           2.00000000 sec
D11          0.03000000 sec
TD0          1

===== CHANNEL f1 =====
SFO1         75.4752949 MHz
NUC1         13C
P1           9.47 usec
PLW1        38.00000000 W

===== CHANNEL f2 =====
SFO2         300.1312005 MHz
NUC2         1H
CPDPRG[2]   waltz16
PCPD2       90.00 usec
PLW2        10.69999981 W
PLW12       0.22325000 W
PLW13       0.11229000 W

F2 - Processing parameters
SI           32768
SF           75.4677485 MHz
WDW          EM
SSB          0
LB           1.00 Hz
GB           0
PC           1.40
  
```

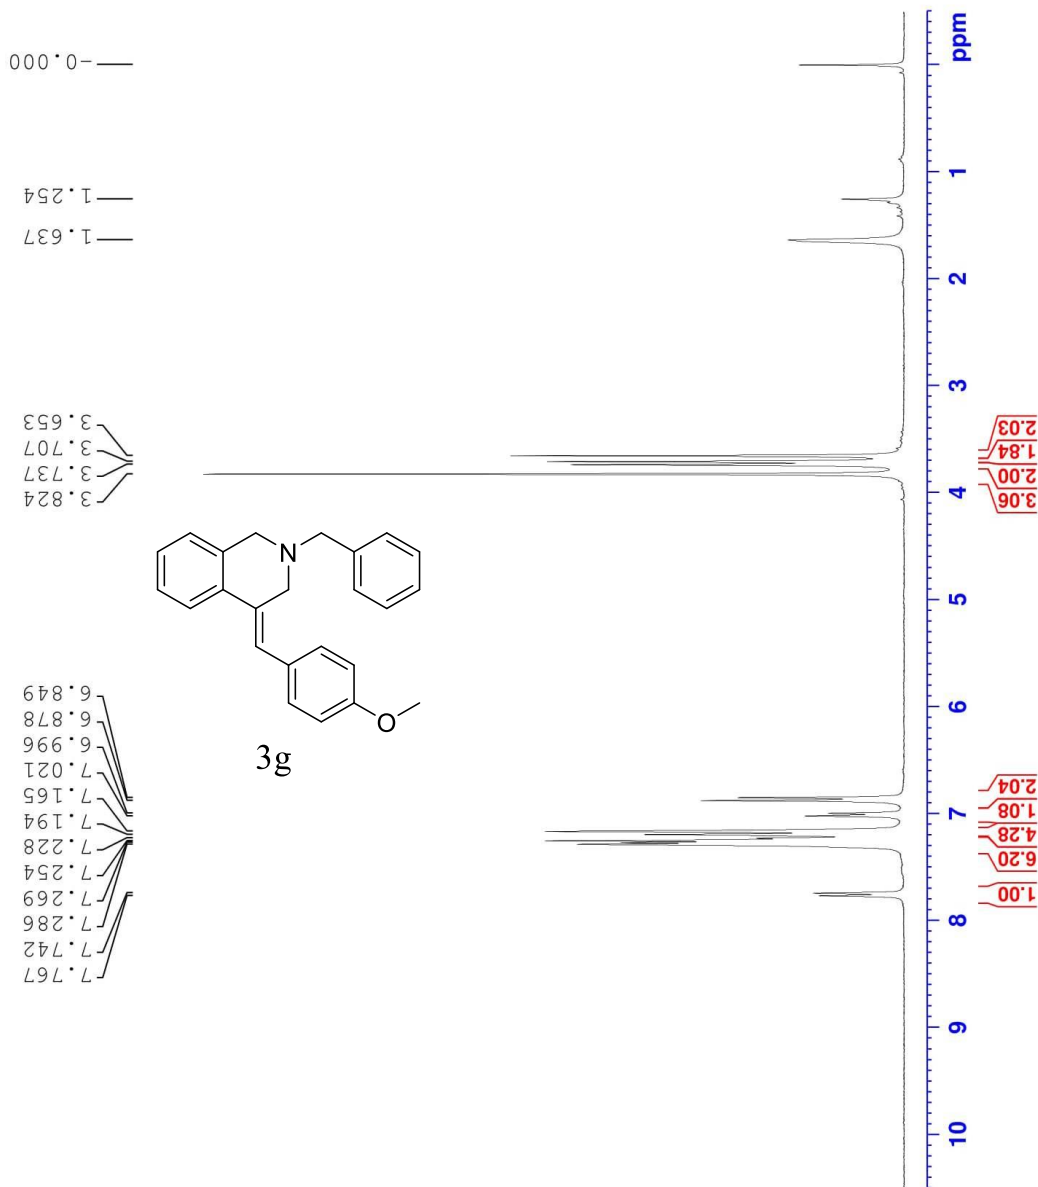

Current Data Parameters  
 NAME 3642Q-R  
 EXPNO 1  
 PROCNO 1

F2 - Acquisition Parameters  
 Date\_ 20180509  
 Time 10.18  
 INSTRUM spect  
 PROBHD 5 mm BBO BB-1H  
 PULPROG zg30  
 TD 65536  
 SOLVENT CDCl3  
 NS 16  
 DS 2  
 SWH 6009.615 Hz  
 FIDRES 0.091699 Hz  
 AQ 5.4525952 sec  
 RG 161  
 DW 83.200 usec  
 DE 6.50 usec  
 TE 288.0 K  
 D1 1.00000000 sec  
 TD0 1

===== CHANNEL f1 =====  
 SF01 300.1318534 MHz  
 NUC1 1H  
 P1 13.00 usec  
 PLW1 10.6999981 W

F2 - Processing parameters  
 SI 65536  
 SF 300.1300088 MHz  
 WDW EM  
 SSB 0  
 LB 0.30 Hz  
 GB 0  
 PC 1.00

158.43  
137.85  
134.66  
133.72  
131.65  
130.57  
129.91  
129.33  
128.26  
127.24  
127.17  
127.02  
126.73  
123.25  
123.15  
113.68

77.47  
77.04  
76.62  
61.65  
55.65  
55.31  
53.85

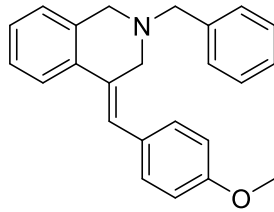

3g

```

Current Data Parameters
NAME          3688C
EXPNO        1
PROCNO       1

F2 - Acquisition Parameters
Date_        20180523
Time         20.42
INSTRUM      spect
PROBHD       5 mm BBO BB-1H
PULPROG      zgpg30
TD           65536
SOLVENT      CDCl3
NS           3072
DS           4
SWH          18028.846 Hz
FIDRES       0.275098 Hz
AQ           1.8175317 sec
RG           912
DW           27.733 usec
DE           6.50 usec
TE           300.0 K
D1           2.0000000 sec
D11          0.03000000 sec
TD0          1

===== CHANNEL f1 =====
SF01         75.4752949 MHz
NUC1         13C
P1           9.47 usec
PLW1         38.00000000 W

===== CHANNEL f2 =====
SF02         300.1312005 MHz
NUC2         1H
PCPDPRG[2]  waltz16
PCPD2        90.00 usec
PLW2         10.69999981 W
PLW12        0.22325000 W
PLW13        0.11229000 W

F2 - Processing parameters
SI           32768
SF           75.4677485 MHz
EM
WDW          0
SSB          0
LB           1.00 Hz
GB           0
PC           1.40

```

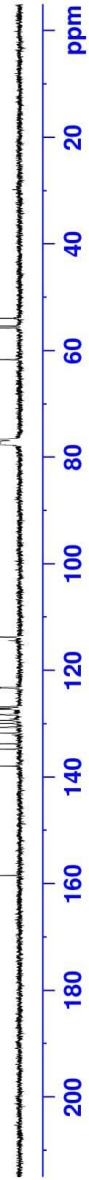

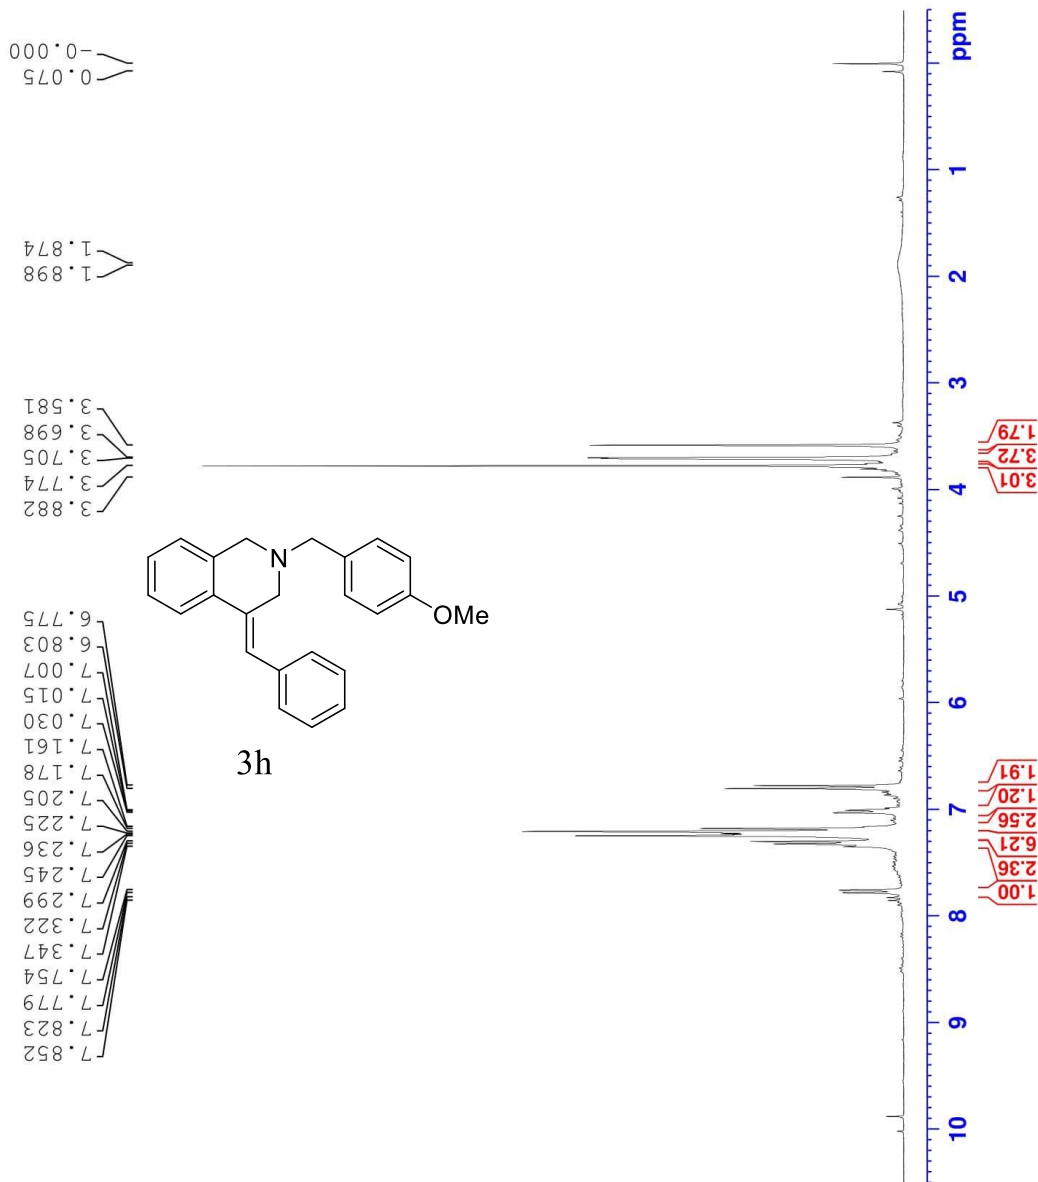

158.84  
137.35  
134.96  
133.54  
133.16  
130.56  
129.80  
129.35  
128.25  
127.59  
127.11  
126.79  
123.61  
123.34  
113.66

77.59  
77.16  
76.74  
60.94  
55.60  
55.28  
53.51

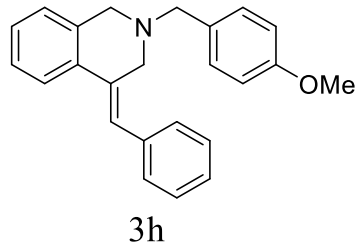

```

Current Data Parameters
NAME          3688D
EXPNO        1
PROCNO       1

F2 - Acquisition Parameters
Date_        20180524
Time         11.47
INSTRUM     spect
PROBHD      5 mm BBO BB-1H
PULPROG     zgpg30
TD          65536
SOLVENT     CDCl3
NS          426
DS          4
SWH         18028.846 Hz
FIDRES     0.275098 Hz
AQ         1.8175317 sec
RG         812
DW         27.733 usec
DE         6.50 usec
TE         300.0 K
D1         2.0000000 sec
DL1        0.03000000 sec
TD0        1

===== CHANNEL f1 =====
SFO1       75.4752949 MHz
NUC1       13C
P1         9.47 usec
PLW1      38.0000000 W

===== CHANNEL f2 =====
SFO2       300.1312005 MHz
NUC2       1H
PCPD2     waltz16
PLW2      10.6999981 W
PLW12     0.22325000 W
PLW13     0.11229000 W

F2 - Processing parameters
SI         32768
SF         75.4677485 MHz
WDW        EM
SSB        0
LB         1.00 Hz
GB         0
PC         1.40
  
```

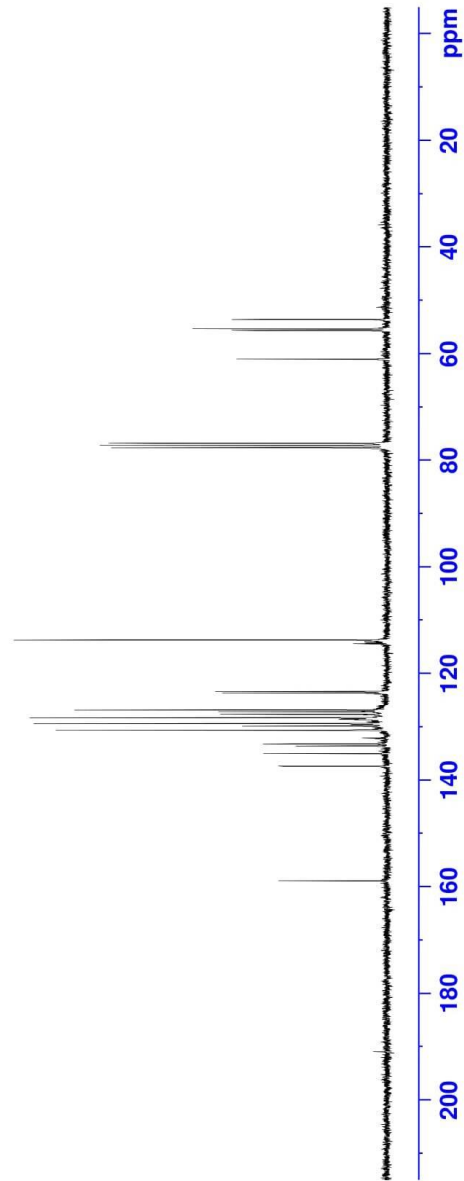

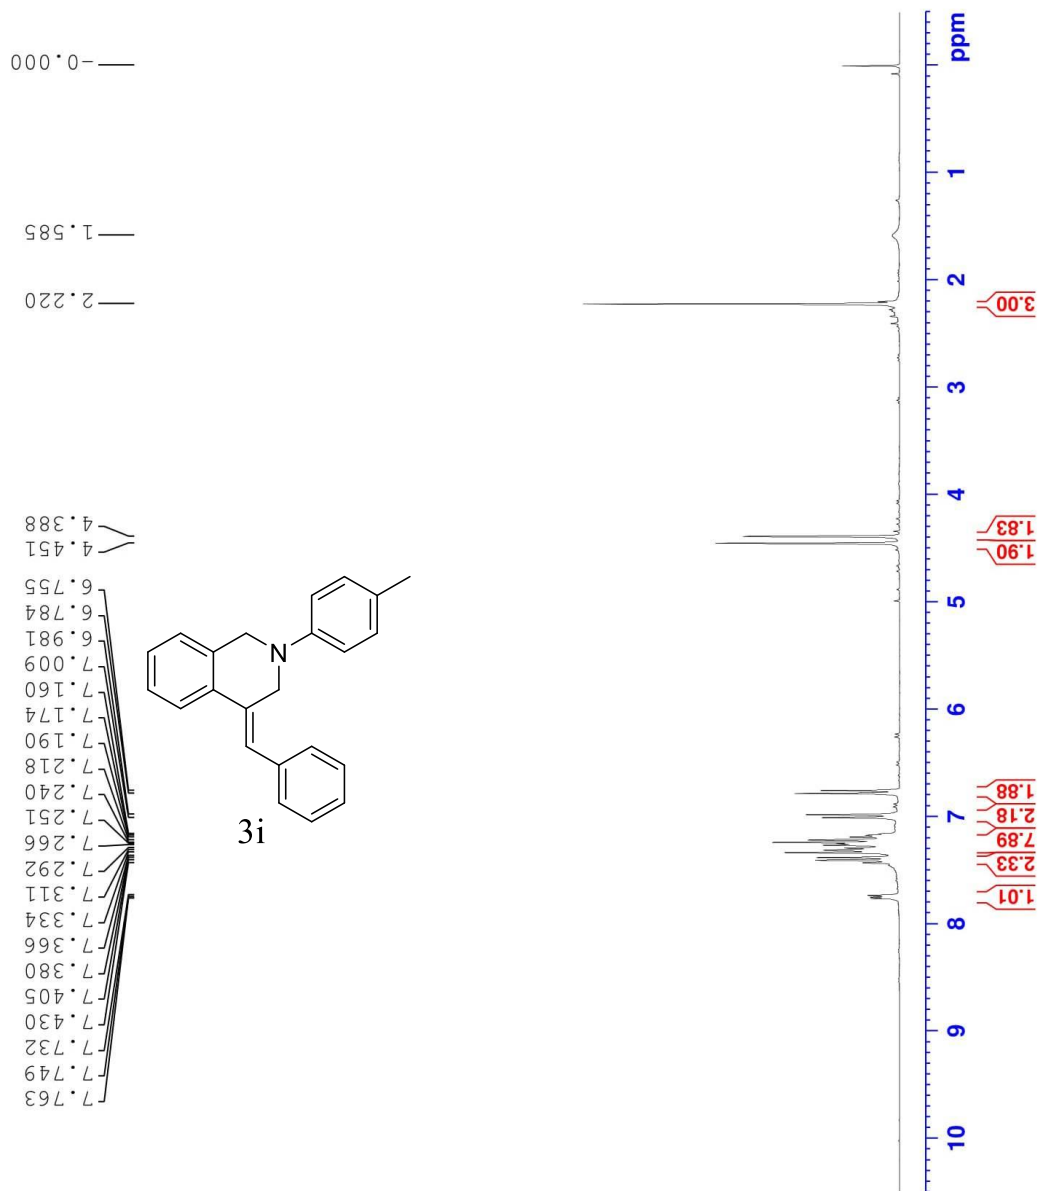

```

Current Data Parameters
NAME          3692F
EXPNO        1
PROCNO       1

F2 - Acquisition Parameters
Date_        20180613
Time         15.01
INSTRUM     spect
PROBHD      5 mm BBO BB-1H
PULPROG     zg30
TD          65536
SOLVENT     CDCl3
NS          16
DS          2
SWH         6009.615 Hz
FIDRES     0.091699 Hz
AQ         5.4525952 sec
RG         144
DW         83.200 usec
DE         6.50 usec
TE         298.0 K
D1         1.00000000 sec
TD0        1

===== CHANNEL f1 =====
SFO1       300.1318534 MHz
NUC1       1H
P1         13.00 usec
PLW1      10.69999981 W

F2 - Processing parameters
SI         65536
SF         300.1300128 MHz
WDW        EM
SSB        0
LB         0.30 Hz
GB         0
PC         1.00

```



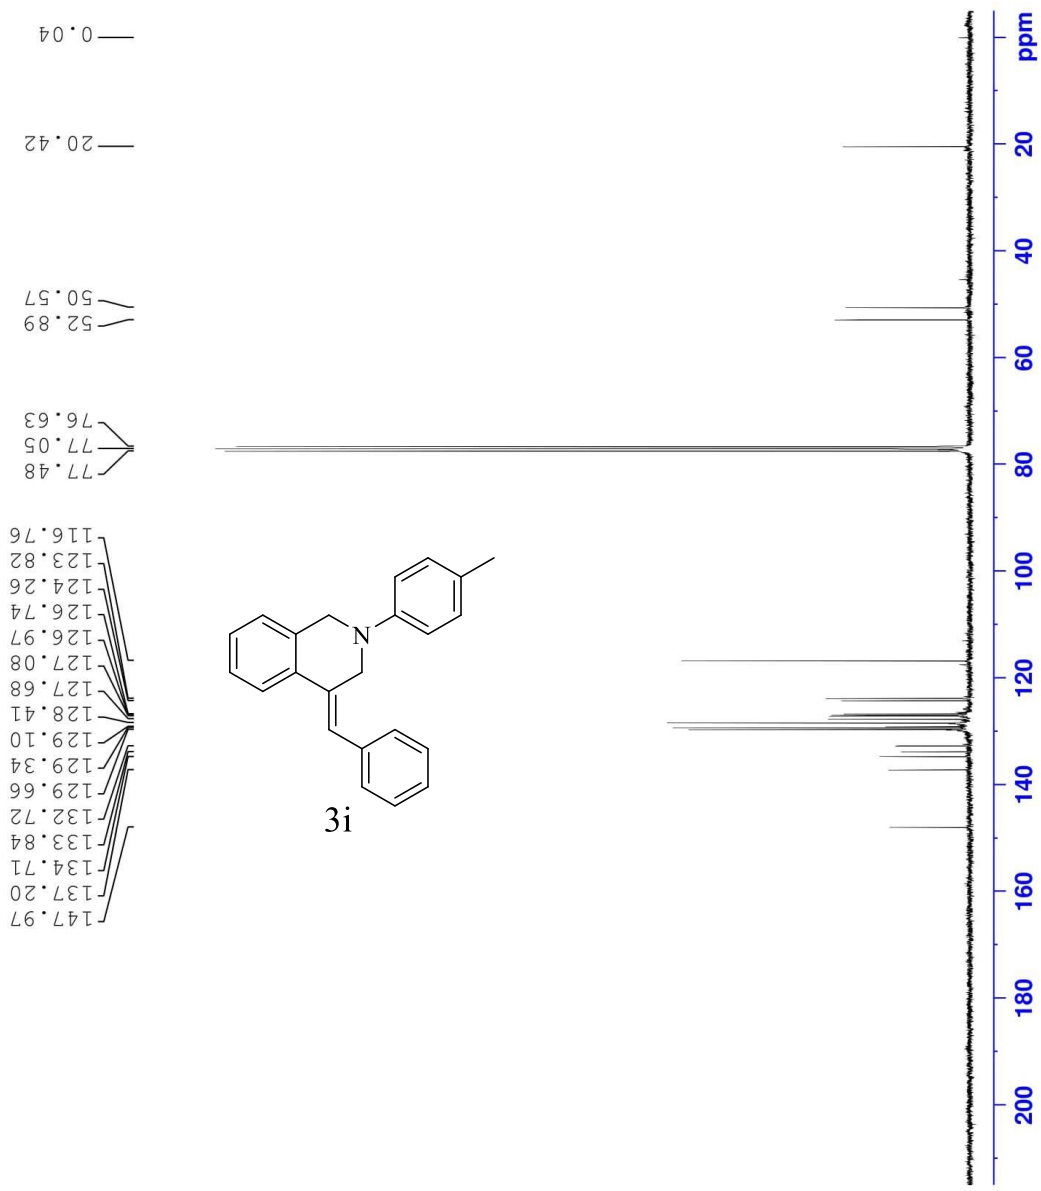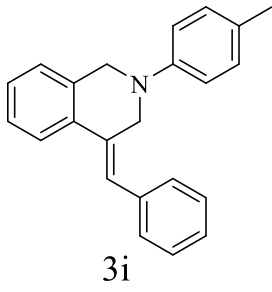

```

Current Data Parameters
NAME          3688K
EXPNO         1
PROCNO       1

F2 - Acquisition Parameters
Date_         20180614
Time          19.30
INSTRUM       spect
PROBHD        5 mm BBO BB-1H
PULPROG       zgpg30
TD            65536
SOLVENT       CDCl3
NS            2048
DS            4
SWH           18028.846 Hz
FIDRES        0.275098 Hz
AQ            1.8175317 sec
RG            912
DW            27.733 usec
DE            6.50 usec
TE            300.0 K
D1            2.0000000 sec
D11           0.0300000 sec
TD0           1

===== CHANNEL f1 =====
SFO1          75.4752949 MHz
NUC1          13C
P1            9.47 usec
PLW1         38.00000000 W

===== CHANNEL f2 =====
SFO2          300.1312005 MHz
NUC2          1H
CPDPRG[2]    waltz16
PCPD2         90.00 usec
PLW2         10.69999981 W
PLW12        0.2225000 W
PLW13        0.11225000 W

F2 - Processing parameters
SI            32768
SF            75.4677485 MHz
WDW           EM
SSB           0
LB            1.00 Hz
GB            0
PC            1.40

```

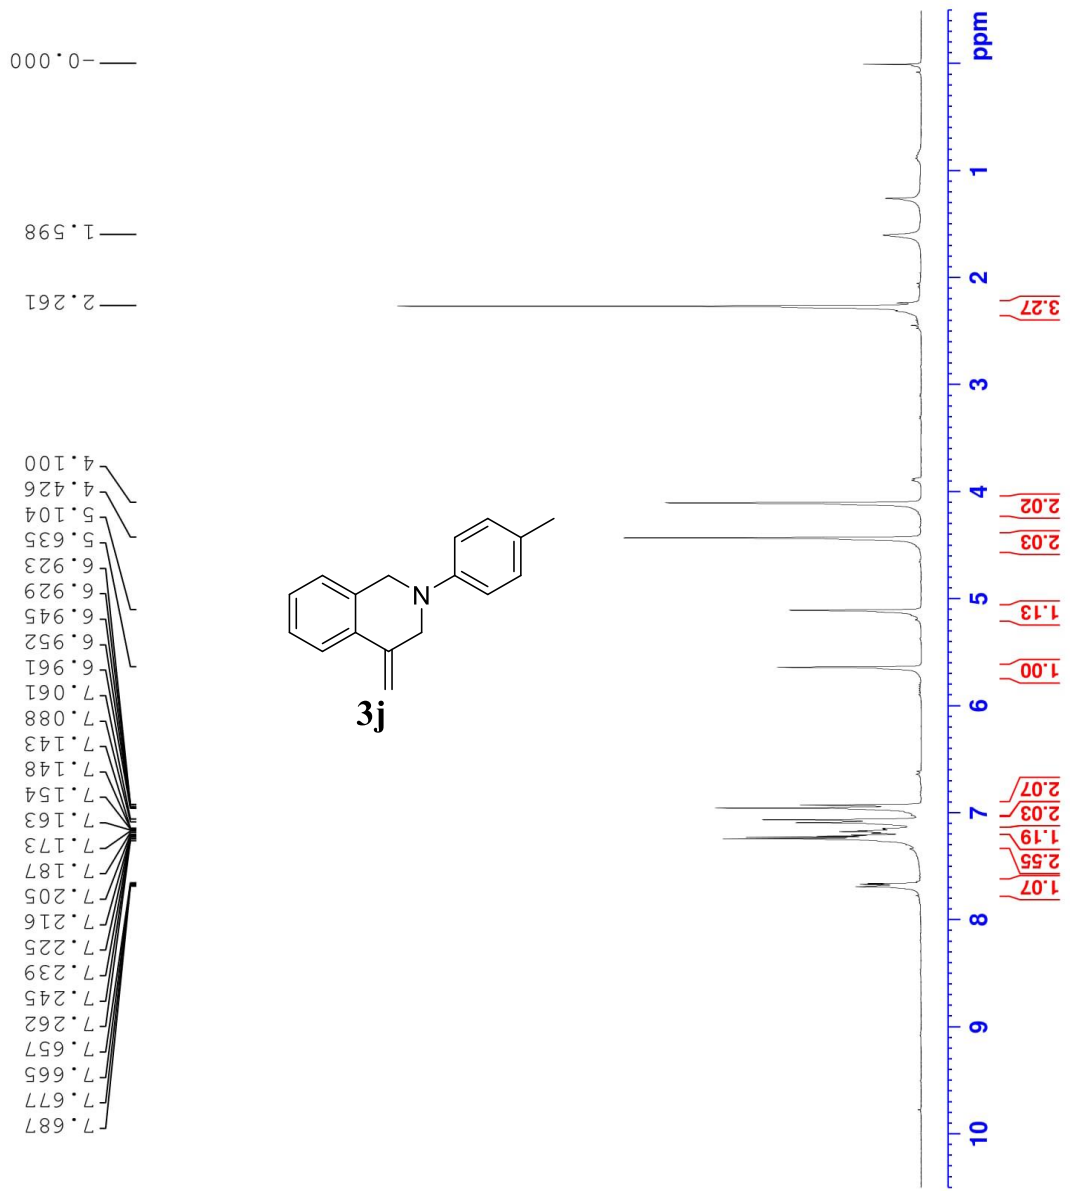

Current Data Parameters  
 NAME H3339C19-R  
 EXENO 1  
 PROCNO 1

F2 - Acquisition Parameters  
 Date\_ 20190625  
 Time 12.25  
 INSTRUM spect  
 PROBHD 5 mm BBO BB-1H  
 PULPROG zg30  
 ID 65536  
 SOLVENT CDCl3  
 NS 13  
 DS 2  
 SWH 6009.615 Hz  
 FIDRES 0.091699 Hz  
 AQ 5.4525952 sec  
 RG 128  
 DW 83.200 usec  
 DE 6.50 usec  
 TE 298.0 K  
 D1 1.00000000 sec  
 TD0 1

===== CHANNEL f1 =====  
 SFO1 300.1318534 MHz  
 NUC1 1H  
 P1 13.00 usec  
 PLW1 10.69999981 W

F2 - Processing parameters  
 SI 65536  
 SF 300.1300129 MHz  
 WDW EM  
 SSB 0  
 LB 0  
 GB 0  
 PC 1.00

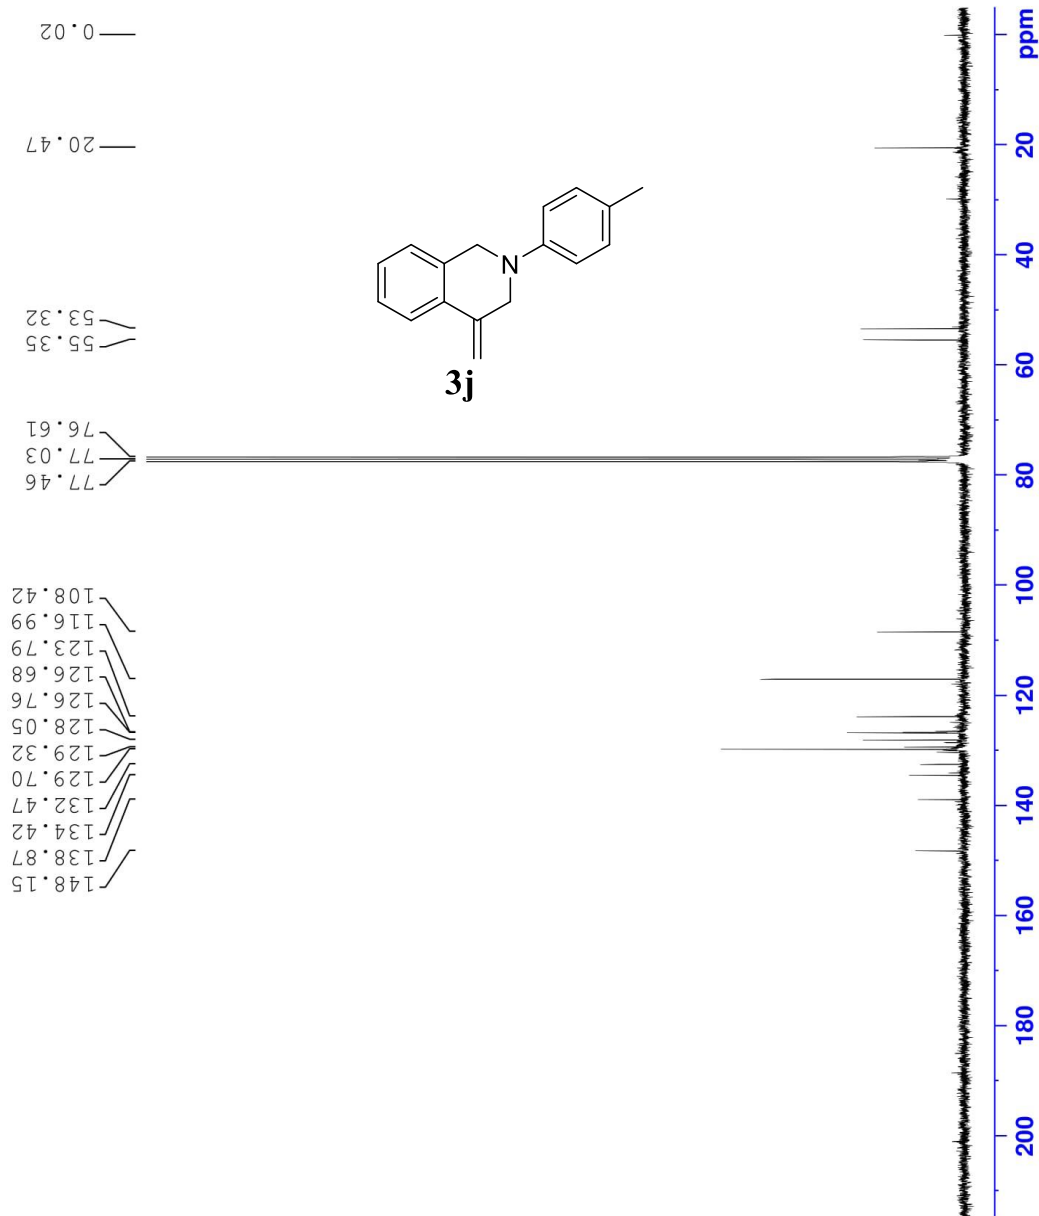

Current Data Parameters  
 NAME C3339C2  
 EXPNO 1  
 PROCNO 1

F2 - Acquisition Parameters  
 Date\_ 20190628  
 Time 19.56  
 INSTRUM spect  
 PROBHD 5 mm BBO BB-IH  
 PULPROG zgpg30  
 TD 65536  
 SOLVENT CDCl3  
 NS 2048  
 DS 4  
 SWH 18028.846 Hz  
 FIDRES 0.275098 Hz  
 AQ 1.8175317 sec  
 RG 1150  
 DW 27.733 usec  
 DE 6.50 usec  
 TE 300.0 K  
 D1 2.0000000 sec  
 D11 0.0300000 sec  
 TD0 1

==== CHANNEL f1 =====  
 SFO1 75.4752949 MHz  
 NUC1 13C  
 P1 9.47 usec  
 PLW1 38.0000000 W

==== CHANNEL f2 =====  
 SFO2 300.1312005 MHz  
 NUC2 1H  
 CPDPRG2 waltz16  
 PCPD2 90.00 usec  
 PLW2 10.69999981 W  
 PLW12 0.22325000 W  
 PLW13 0.11229000 W

F2 - Processing parameters  
 SI 32768  
 SF 75.4677485 MHz  
 WDW EM  
 SSB 0  
 LB 1.00 Hz  
 GB 0  
 PC 1.40

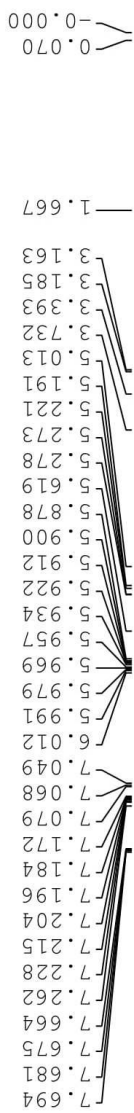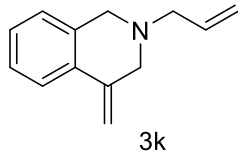

```

Current Data Parameters
NAME      3692D
EXPNO    2
PROCNO   1

F2 - Acquisition Parameters
Date_    20180612
Time     16.58
INSTRUM  spect
PROBHD   5 mm BBO BB-1H
PULPROG  zg30
TD        65536
SOLVENT  CDCl3
NS        16
DS        2
SWH       6009.615 Hz
FIDRES    0.091699 Hz
AQ         5.4525952 sec
RG         203
DW         83.200 usec
DE         6.50 usec
TE         298.0 K
D1         1.0000000 sec
TD0        1

===== CHANNEL f1 =====
SFO1     300.1318534 MHz
NUC1      1H
P1        13.00 usec
PLW1     10.6999981 W

F2 - Processing parameters
SI        65536
SF        300.1300060 MHz
WDW       EM
SSB       0
LB        0.30 Hz
GB        0
PC        1.00
  
```

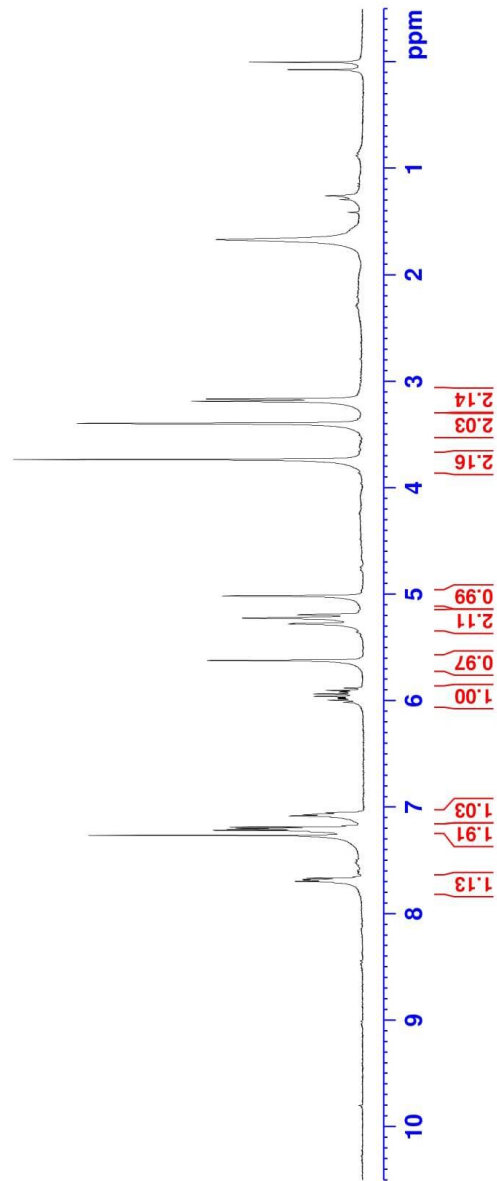

139.25  
135.10  
134.60  
132.17  
127.88  
126.88  
126.60  
123.44  
118.19  
108.00

77.45  
77.03  
76.61  
60.33  
58.02  
56.39

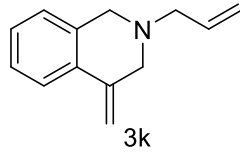

```

Current Data Parameters
NAME      C2552B5
EXPNO    1
PROCNO   1

F2 - Acquisition Parameters
Date_    20180703
Time     19.29
INSTRUM spect
PROBHD   5 mm BBO BB-1H
PULPROG zgpg30
TD       65536
SOLVENT  CDC13
NS       2048
DS       4
SWH      18028.846 Hz
FIDRES   0.275098 Hz
AQ       1.8175317 sec
RG       812
DW       27.733 usec
DE       6.50 usec
TE       300.0 K
D1       2.00000000 sec
D11      0.03000000 sec
TD0      1

===== CHANNEL f1 =====
SFO1    75.4752949 MHz
NUC1    13C
P1      9.47 usec
PLW1    38.00000000 W

===== CHANNEL f2 =====
SFO2    300.1312005 MHz
NUC2    1H
CFPRG[2] waitz16
PCPD2   90.00 usec
PLW2    10.69989981 W
PLW12   0.22325000 W
PLW13   0.11229000 W

F2 - Processing parameters
SI      32768
SF      75.4677485 MHz
WDW     EM
SSB     0
LB      1.00 Hz
GB      0
PC      1.40
  
```

200 180 160 140 120 100 80 60 40 20 ppm

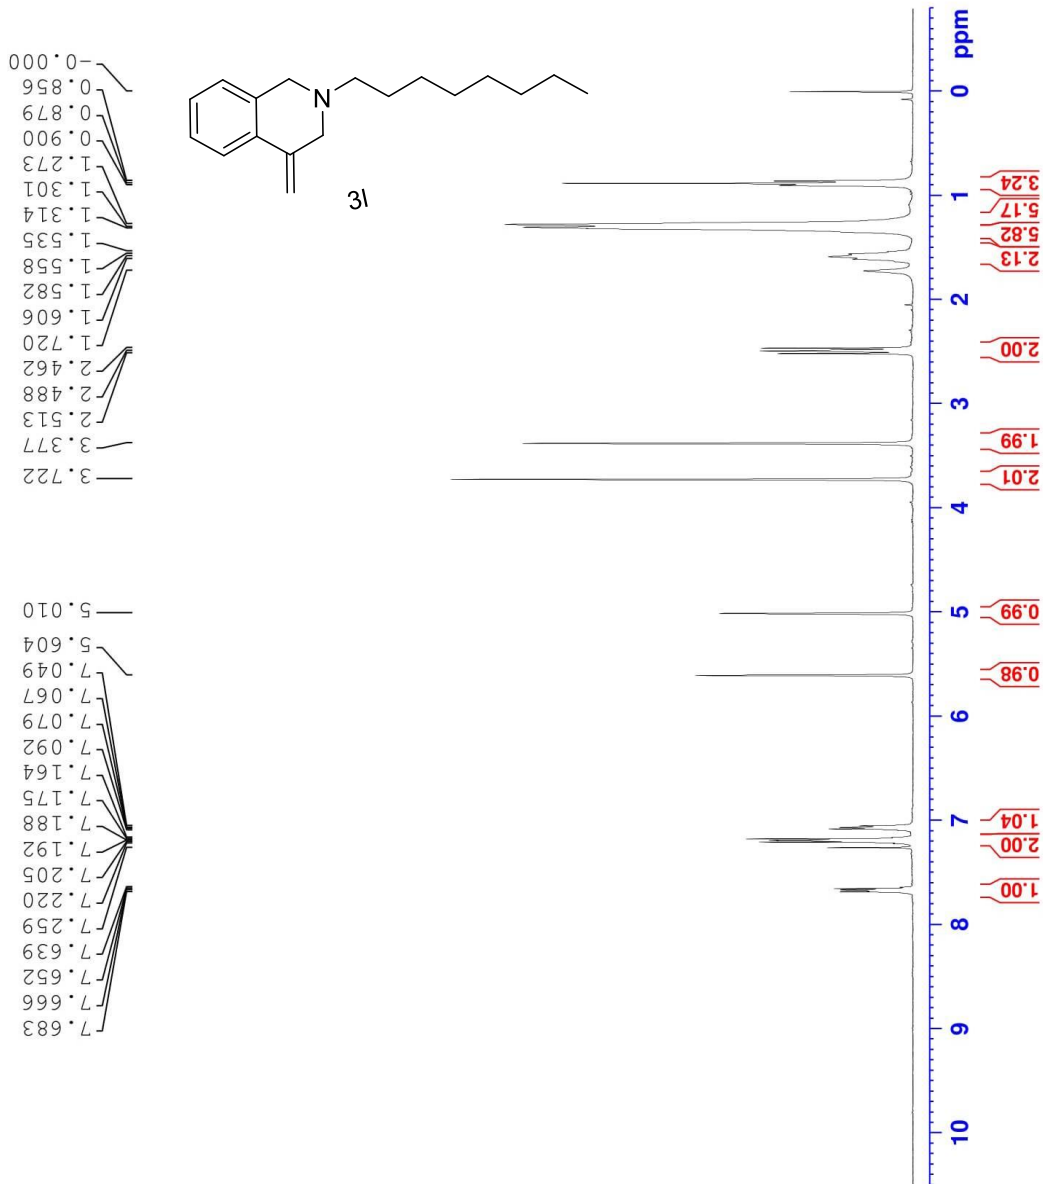

107.78  
 139.50  
 134.85  
 132.23  
 127.83  
 126.89  
 126.52  
 123.40  
 77.48  
 77.06  
 76.63  
 58.48  
 57.41  
 56.77  
 31.87  
 29.60  
 29.28  
 27.60  
 27.27  
 22.69  
 14.13

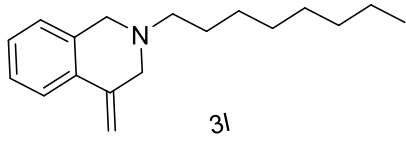

Current Data Parameters  
 NAME C2552B11  
 EXPNO 1  
 PROCNO 1  
 F2 - Acquisition Parameters  
 Date\_ 20180725  
 Time 13.16  
 INSTRUM spect  
 PROBHD 5 mm BBO BB-1H  
 PULPROG zgpg30  
 TD 65536  
 SOLVENT CDCl3  
 NS 560  
 DS 4  
 SWH 18028.846 Hz  
 FIDRES 0.275098 Hz  
 AQ 1.8175317 sec  
 RG 912  
 DW 27.733 usec  
 DE 6.50 usec  
 TE 300.0 K  
 D1 2.00000000 sec  
 D11 0.03000000 sec  
 TD0 1  
 ===== CHANNEL f1 =====  
 SFO1 75.4752949 MHz  
 NUC1 13C  
 P1 9.47 usec  
 PLW1 38.00000000 W  
 ===== CHANNEL f2 =====  
 SFO2 300.1312005 MHz  
 NUC2 1H  
 CPDPRG2 waltz16  
 PCPD2 90.00 usec  
 PLW2 10.69999981 W  
 PLW12 0.22325000 W  
 PLW13 0.11229000 W  
 F2 - Processing parameters  
 SI 32768  
 SF 75.4677485 MHz  
 WDW EM  
 SSB 0  
 LB 1.00 Hz  
 GB 0  
 PC 1.40

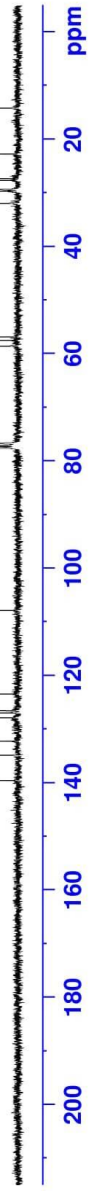





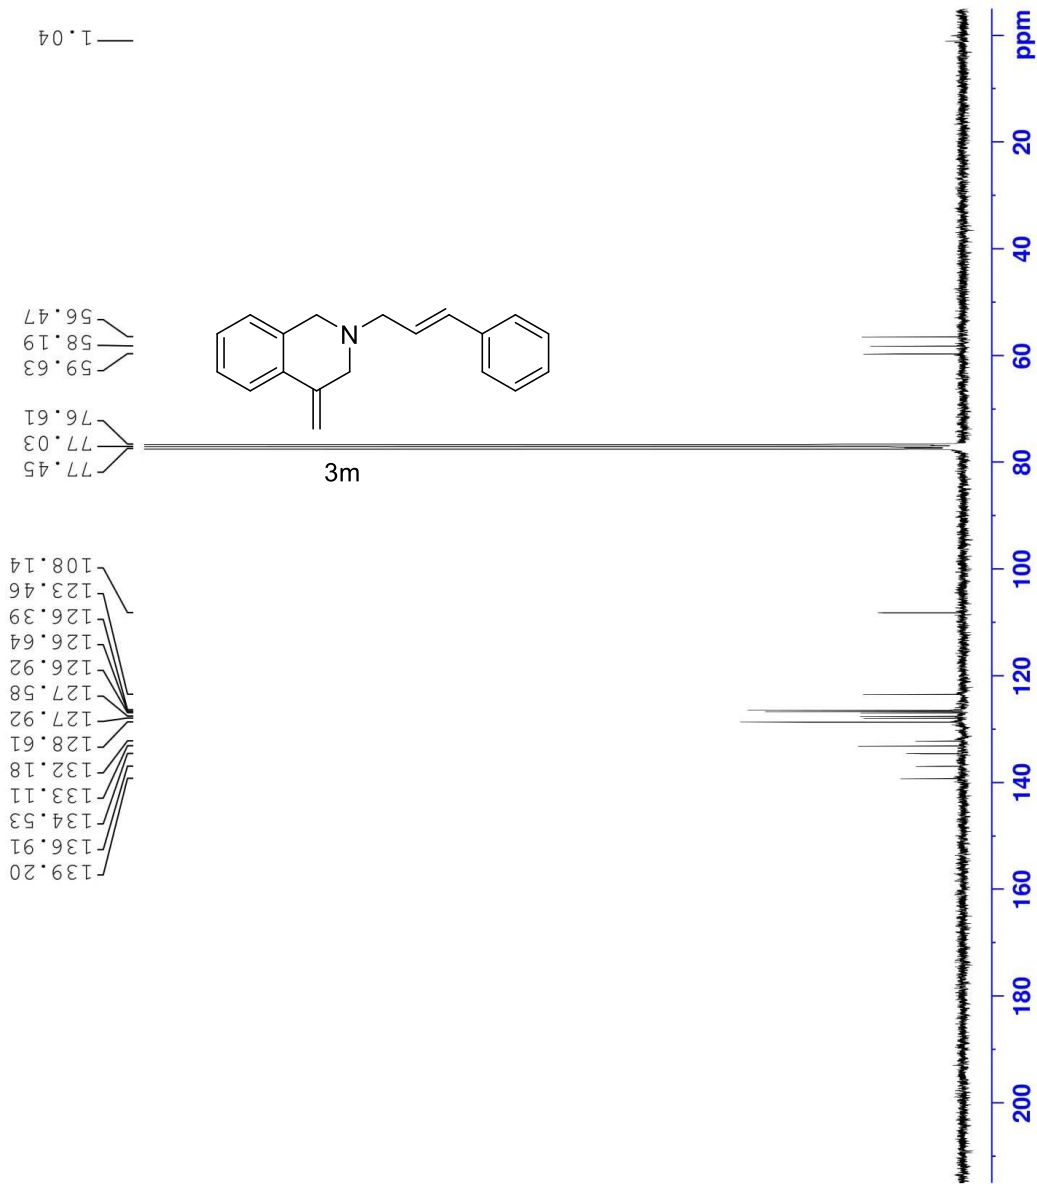

```

Current Data Parameters
NAME      C2552B4
EXPNO    1
PROCNO   1

F2 - Acquisition Parameters
Date_    20180702
Time     18.18
INSTRUM spect
PROBHD   5 mm BBO BB-IH
PULPROG zgpg30
TD       65536
SOLVENT  CDCl3
NS       2048
DS       4
SWH      18028.846 Hz
FIDRES   0.275098 Hz
AQ       1.8175317 sec
RG       912
DW       27.733 usec
DE       6.50 usec
TE       300.0 K
D1       2.0000000 sec
dL1      0.03000000 sec
TD0      1

===== CHANNEL f1 =====
SFO1    75.4752949 MHz
NUC1    13C
P1      9.47 usec
PLW1    38.0000000 W

===== CHANNEL f2 =====
SFO2    300.1312005 MHz
NUC2    1H
CPDPRG2 waltz16
PCPD2   90.00 usec
PLW2    10.6999981 W
PLW12   0.2232500 W
PLW13   0.1122900 W

F2 - Processing parameters
SI      32768
SF      75.4677485 MHz
WDW     EM
SSB     0
LB      1.00 Hz
GB      0
PC      1.40

```

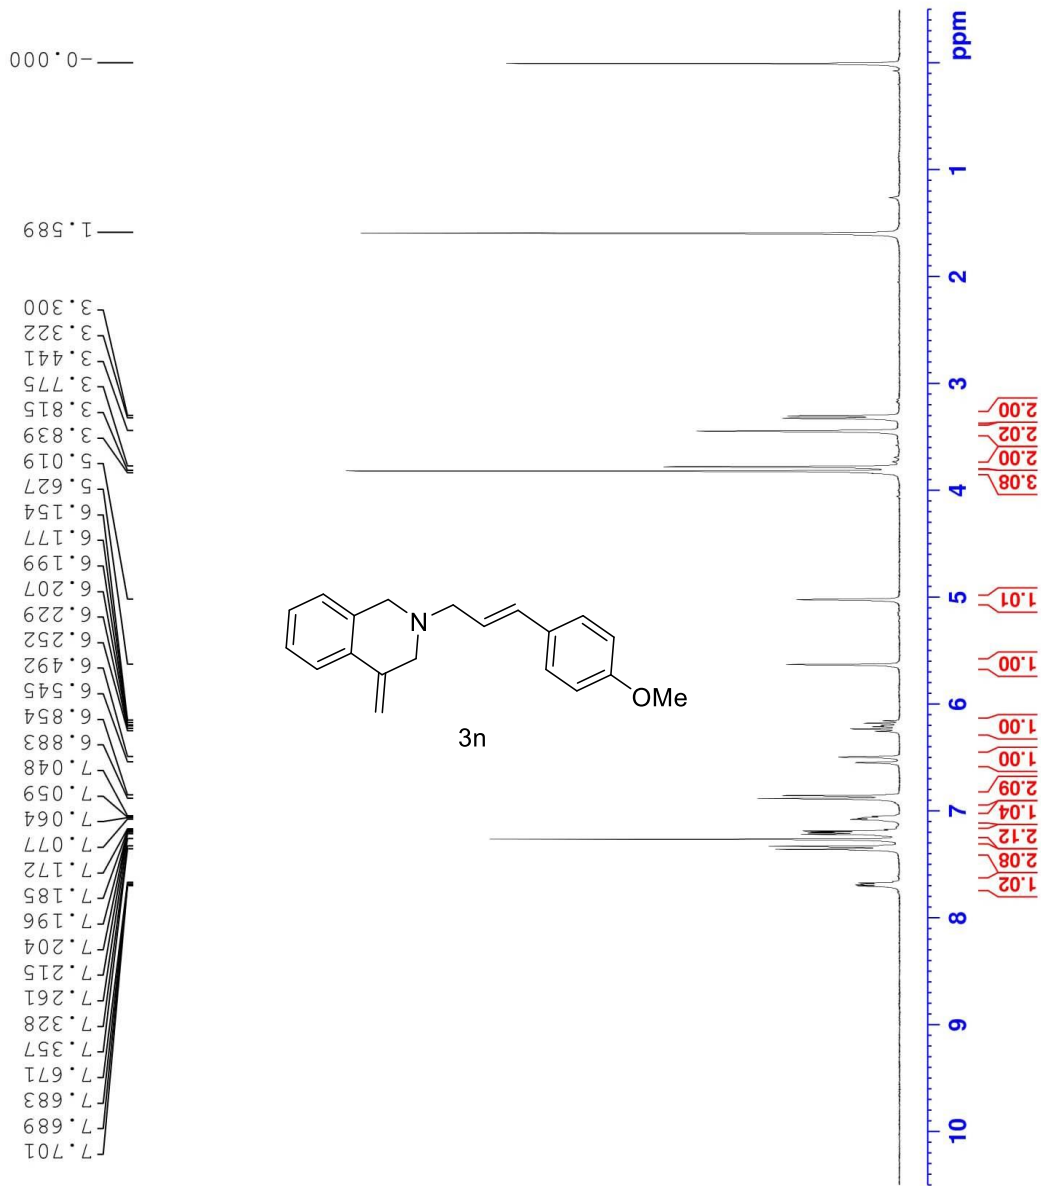

159.21  
139.31  
134.65  
132.55  
132.22  
129.75  
127.89  
127.55  
126.92  
126.61  
124.38  
123.46  
114.04  
108.06

77.47  
77.04  
76.62  
59.78  
58.18  
56.47  
55.33

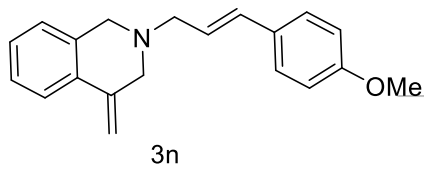

```

Current Data Parameters
NAME          C2552B6
EXPNO        1
PROCNO       1

F2 - Acquisition Parameters
Date_        20180705
Time         17.22
INSTRUM      spect
PROBHD       5 mm BBO BB-1H
PULPROG      zgpg30
TD           65536
SOLVENT      CDCl3
NS           400
DS           4
SWH          18028.846 Hz
FIDRES       0.275098 Hz
AQ           1.8175317 sec
RG           912
DW           27.733 usec
DE           6.50 usec
TE           300.0 K
D1           2.00000000 sec
D11          0.03000000 sec
TD0          1

===== CHANNEL f1 =====
SFO1         75.4752949 MHz
NUC1         13C
P1           9.47 usec
PLW1        38.00000000 W

===== CHANNEL f2 =====
SFO2         300.1312005 MHz
NUC2         1H
PCPD2        waltz16
PCPD2        90.00 usec
PLW2         10.69999981 W
PLW12        0.22325000 W
PLW13        0.11229000 W

F2 - Processing parameters
SI           32768
SF           75.4677485 MHz
WDW          EM
SSB          0
LB           1.00 Hz
GB           0
PC           1.40

```

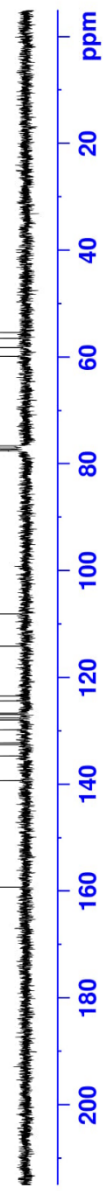

7.780  
 7.773  
 7.773  
 7.751  
 7.389  
 7.365  
 7.340  
 7.297  
 7.273  
 7.259  
 7.248  
 7.242  
 7.235  
 7.228  
 7.220  
 7.210  
 7.204  
 7.198  
 7.095  
 7.072  
 5.371  
 5.343  
 5.321  
 5.298  
 3.662  
 3.609  
 2.973  
 1.639  
 1.570  
 1.526  
 1.504  
 1.284  
 1.254  
 0.071  
 -0.000

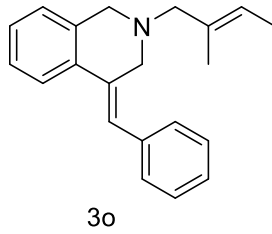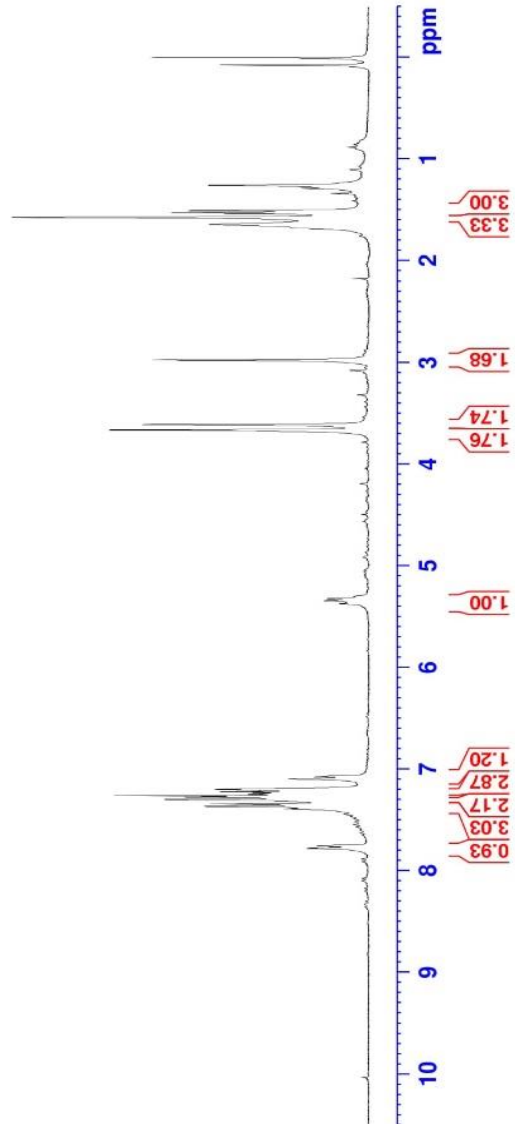

Current Data Parameters  
 NAME H2552D19  
 EXPNO 1  
 PROCNO 1

F2 - Acquisition Parameters

Date\_ 20180915  
 Time 12.36  
 INSTRUM spect  
 PROBHD 5 mm BBO BB-1H  
 PULPROG zg30  
 ID 65536  
 SOLVENT CDCl3  
 NS 16  
 DS 2  
 SWH 6009.615 Hz  
 FIDRES 0.091699 Hz  
 AQ 5.4525952 sec  
 RG 203  
 DW 83.200 usec  
 DE 6.50 usec  
 TE 298.0 K  
 D1 1.00000000 sec  
 TD0 1

CHANNEL f1

SFO1 300.1318534 MHz  
 NUC1 1H  
 P1 13.00 usec  
 PLW1 10.69999981 W

F2 - Processing parameters

SI 65536  
 SF 300.1300068 MHz  
 WDW EM  
 SSB 0  
 LB 0  
 GB 0  
 PC 1.00

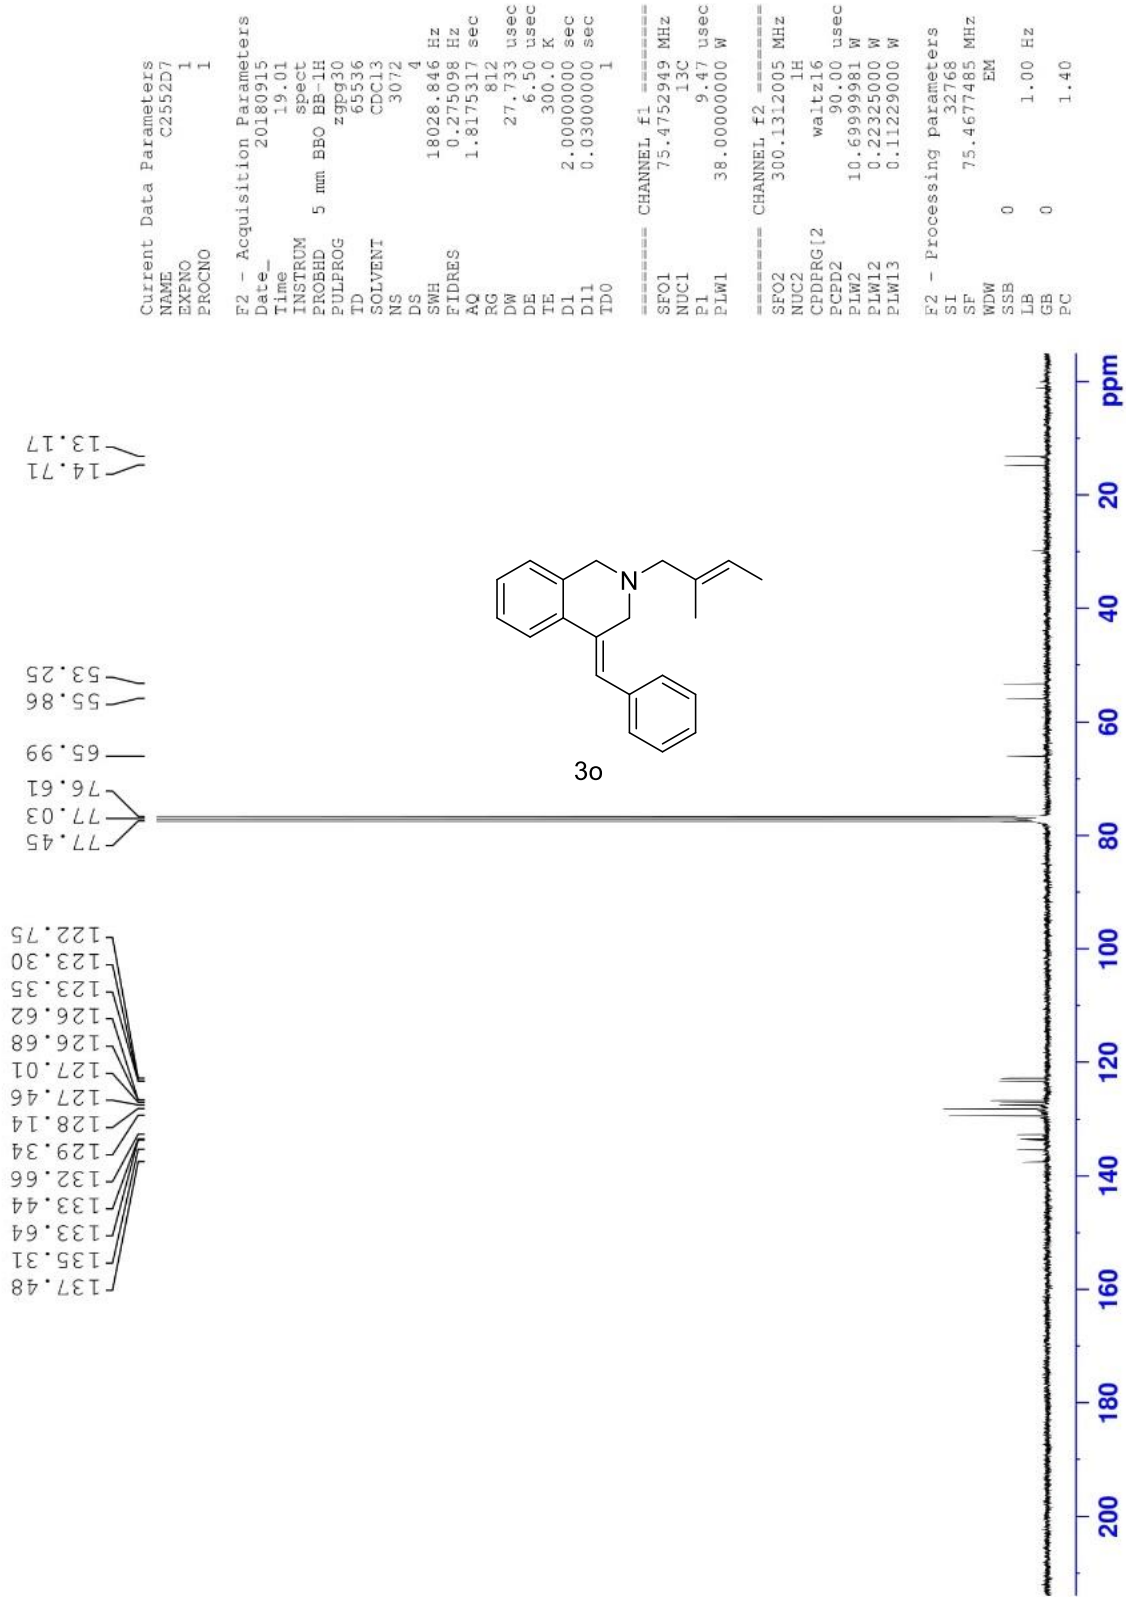

7.690  
7.676  
7.671  
7.660  
7.319  
7.259  
7.228  
7.205  
7.194  
7.187  
7.175  
7.163  
7.074  
7.062  
7.044  
5.597  
5.458  
5.436  
5.414  
5.391  
4.987  
3.825  
3.709  
3.685  
3.635  
3.487  
3.336  
3.294  
3.101  
3.001  
1.775  
1.681  
1.662  
1.640  
1.602  
1.406  
1.333  
1.284  
1.254  
1.010  
0.985  
0.960  
0.880  
0.872  
0.000

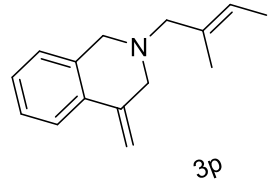

```

Current Data Parameters
NAME      H2552F1
EXPNO    1
PROCNO   1

F2 - Acquisition Parameters
Date_    20181011
Time     16.21
INSTRUM spect
PROBHD   5 mm BBO BB-1H
PULPROG zg30
TD       65536
SOLVENT  CDC13
NS       16
DS       2
SWH      6009.615 Hz
FIDRES   0.051699 Hz
AQ       5.4525952 sec
RG       181
DE       83.200 usec
TE       298.0 K
DL       1.00000000 sec
TD0      1

===== CHANNEL f1 =====
SF01    300.1318534 MHz
NUC1    1H
P1      13.00 usec
PL1     10.69999981 W

F2 - Processing parameters
SI      65536
SF      300.1300071 MHz
WDW     EM
SSB     0
LB      0.30 Hz
GB      0
PC      1.00
  
```

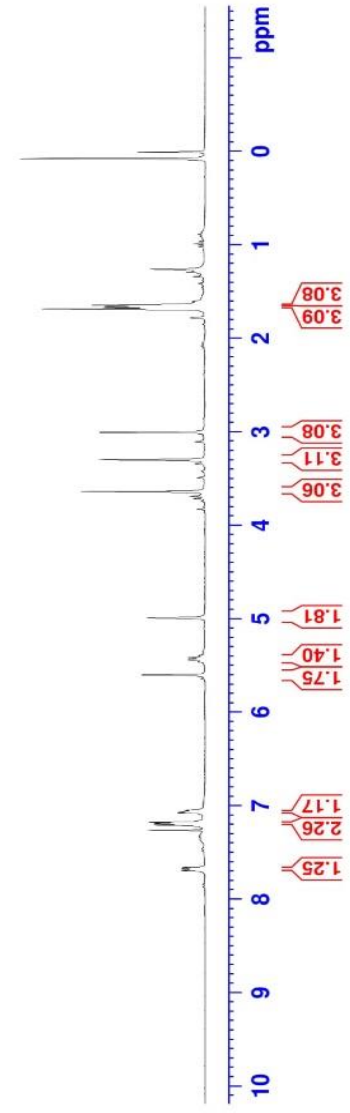

139.63  
 135.05  
 132.85  
 132.32  
 127.75  
 126.88  
 126.41  
 123.37  
 122.42  
 107.58  
 77.42  
 77.00  
 76.58  
 66.03  
 57.93  
 56.41  
 14.75  
 13.30  
 1.01

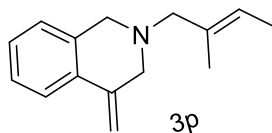

```

Current Data Parameters
NAME          C2552E5
EXPNO        1
PROCNO       1

F2 - Acquisition Parameters
Date_        20181012
Time         12.12
INSTRUM      spect
PROBHD       5 mm BBO BB-IH
PULPROG      zgpg30
TD           65536
SOLVENT      CDCl3
NS           2048
DS           4
SWH          18028.846 Hz
FIDRES       0.275098 Hz
AQ           1.8175317 sec
RG           912
DE           27.733 usec
TE           300.0 K
D1           2.00000000 sec
DI1          0.03000000 sec
TD0          1

===== CHANNEL f1 =====
SFO1         75.4752949 MHz
NUC1         13C
P1           9.47 usec
PLW1        38.00000000 W

===== CHANNEL f2 =====
SFO2         300.1312005 MHz
NUC2         1H
CPDPRG[2]   waitz16
PCPD2        90.00 usec
PLW2         10.69999981 W
PLW12        0.22325000 W
PLW13        0.11229000 W

F2 - Processing parameters
SI           32768
SF           75.4677509 MHz
WDW          EM
SSB          0
LB           1.00 Hz
GB           0
PC           1.40
  
```

200 180 160 140 120 100 80 60 40 20 ppm

Current Data Parameters  
 NAME H3339A12-R  
 EXPNO 1  
 PROCNO 1

F2 - Acquisition Parameters  
 Date\_ 20190415  
 Time 13.50  
 INSTRUM spect  
 PROBHD 5 mm BBO BB-1H  
 PULPROG zg30  
 TD 65536  
 SOLVENT CDC13  
 NS 16  
 DS 2  
 SWH 6009.615 Hz  
 FIDRES 0.091699 Hz  
 AQ 5.4525952 sec  
 RG 203  
 DW 83.200 usec  
 DE 6.50 usec  
 TE 298.0 K  
 D1 1.0000000 sec  
 TD0 1

==== CHANNEL f1 =====  
 SFO1 300.1318534 MHz  
 NUC1 1H  
 P1 13.00 usec  
 PLW1 10.6999981 W

F2 - Processing parameters  
 SI 65536  
 SF 300.1300114 MHz  
 WDW EM  
 SSB 0  
 LB 0 0.30 Hz  
 GB 0  
 PC 1.00

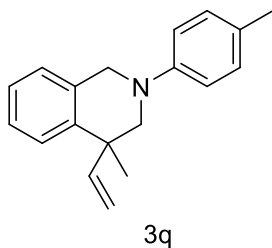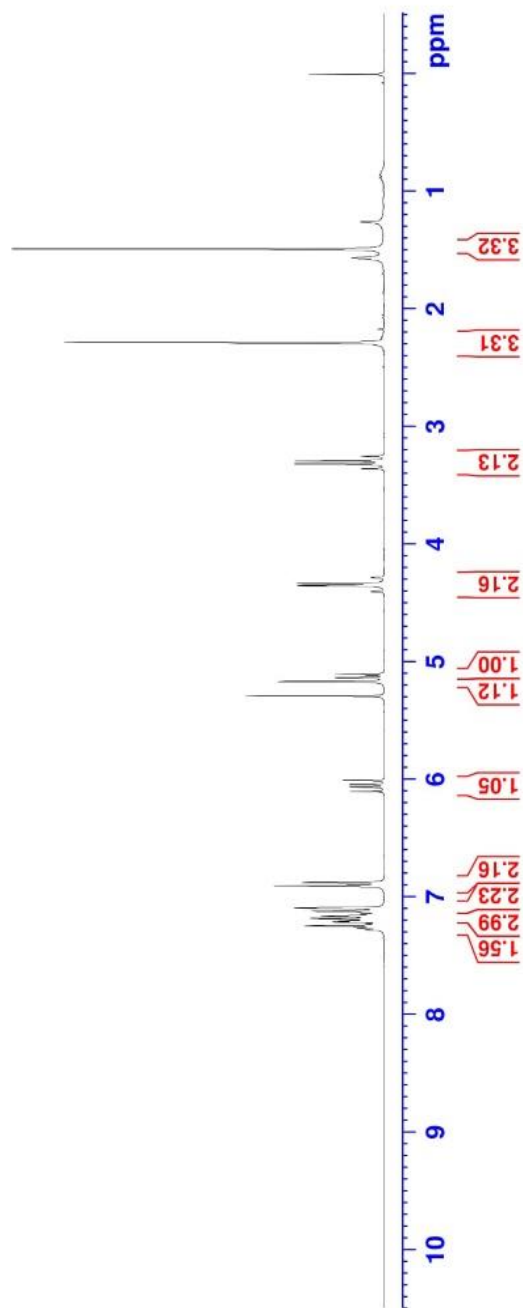



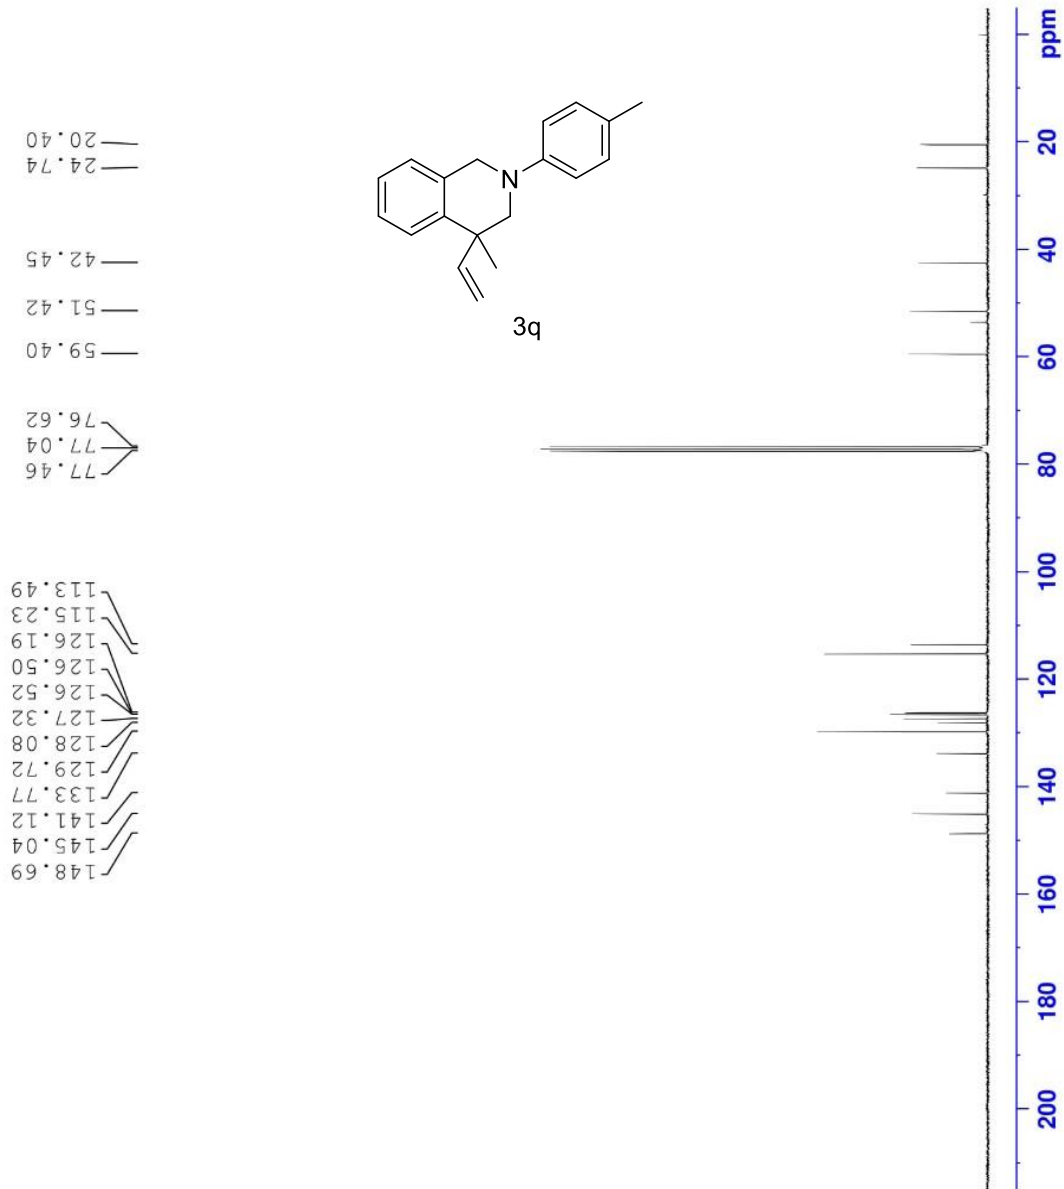

Current Data Parameters  
 NAME C3339B4  
 EXPNO 1  
 PROCNO 1

F2 - Acquisition Parameters

Date\_ 20190415  
 Time 20.40  
 INSTRUM spect  
 PROBHD 5 mm BBO BB-1H  
 PULPROG zgpg30  
 TD 65536  
 SOLVENT CDCl3  
 NS 3072  
 DS 4  
 SWH 18028.846 Hz  
 FIDRES 0.275098 Hz  
 AQ 1.8175317 sec  
 RG 724  
 DW 27.733 usec  
 DE 6.50 usec  
 TE 300.0 K  
 D1 2.00000000 sec  
 D11 0.03000000 sec  
 TD0 1

==== CHANNEL f1 =====  
 SFO1 75.4752949 MHz  
 NUC1 13C  
 P1 9.47 usec  
 PLW1 38.00000000 W

==== CHANNEL f2 =====  
 SFO2 300.1312005 MHz  
 NUC2 1H  
 CFPD2 waitz16  
 P1 90.00 usec  
 PLW2 10.69999981 W  
 PLW12 0.22325000 W  
 PLW13 0.11229000 W

F2 - Processing parameters

SI 32768  
 SF 75.4677485 MHz  
 WDW EM  
 SSB 0  
 LB 1.00 Hz  
 GB 0  
 PC 1.40



## 1. Single crystal XRD analysis of compound **3g**

Compound **3g** was dissolved in acetonitrile:ethanol (1:1 v/v) mixture and kept for solvent evaporation at room temperature. After three days, single crystals of **3g** were harvested and used for single crystal XRD studies.

X-ray data for the compound **3g** were collected at room temperature using a Bruker D8 Quest single crystal X-ray diffractometer equipped with microfocus Mo-K $\alpha$  radiation ( $\lambda=0.71073\text{\AA}$ ) and Photon 100 detector. Preliminary lattice parameters and orientation matrices were obtained from four sets of frames. Unit cell dimensions were determined using 8290 reflections. Integration and scaling of intensity data were accomplished using SAINT program. The structure was solved using SHELXS-97 and refinement was carried out by full-matrix least-squares technique using SHELXL-2018/3. Anisotropic displacement parameters were included for all non-hydrogen atoms. All H atoms were positioned geometrically and treated as riding on their parent C atoms with C-H distances of 0.93--0.97  $\text{\AA}$ , and with  $U_{\text{iso}}(\text{H}) = 1.2U_{\text{eq}}(\text{C})$  or  $1.5U_{\text{eq}}$  for methyl atoms. Crystal data and refinement parameters for compound **3g** are summarized in Table S1. CCDC 1912875 contains the supplementary crystallographic data for this paper which can be obtained free of charge at <https://summary.ccdc.cam.ac.uk/structure-summary-form> or from the Cambridge Crystallographic Data Centre (CCDC), 12 Union Road, Cambridge CB2 1EZ, UK; fax: +44(0) 1223 336 033; email: deposit@ccdc.cam.ac.uk.

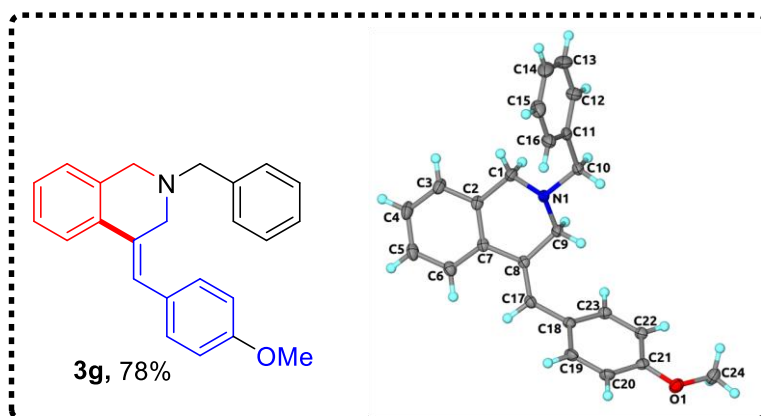

X-ray crystal structure of **3g** compound. Displacement ellipsoids are drawn at the 30% probability level.

**Table S1. Crystal Data Collection and Refinement Parameters for compound 3g.**

|                                                                                          |                                    |
|------------------------------------------------------------------------------------------|------------------------------------|
| Chemical formula                                                                         | C <sub>24</sub> H <sub>23</sub> NO |
| <i>F</i> <sub>w</sub> ; <i>F</i> (000)                                                   | 341.43; 364                        |
| <i>T</i> (K)                                                                             | 293(2)                             |
| wavelength (Å)                                                                           | 0.71073                            |
| Crystal system                                                                           | Triclinic                          |
| space group                                                                              | P-1                                |
| <i>a</i> (Å)                                                                             | 6.1269(7)                          |
| <i>b</i> (Å)                                                                             | 9.0770(12)                         |
| <i>c</i> (Å)                                                                             | 17.366(2)                          |
| $\alpha$ (deg)                                                                           | 79.554(4)                          |
| $\beta$ (deg)                                                                            | 84.737(4)                          |
| $\gamma$ (deg)                                                                           | 81.243(5)                          |
| <i>Z</i>                                                                                 | 2                                  |
| <i>V</i> (Å <sup>3</sup> )                                                               | 936.6(2)                           |
| $\rho_{\text{calcd}}$ (g·cm <sup>-3</sup> )                                              | 1.211                              |
| $\mu$ (mm <sup>-1</sup> )                                                                | 0.073                              |
| $\theta$ range (deg); completeness                                                       | 2.304 – 27.496; 0.999              |
| collected reflections; <i>R</i> <sub><math>\sigma</math></sub>                           | 20789; 0.0400                      |
| unique reflections; <i>R</i> <sub>int</sub>                                              | 20789; 0.0473                      |
| <i>R</i> 1 <sup>a</sup> ; <i>wR</i> 2 <sup>b</sup> [ <i>I</i> > 2 $\sigma$ ( <i>I</i> )] | 0.0466; 0.1479                     |
| <i>R</i> 1; <i>wR</i> 2 [all data]                                                       | 0.0681; 0.1672                     |
| GOF                                                                                      | 1.158                              |
| largest diff peak and hole                                                               | 0.170 and -0.196                   |

## 2. Quantum chemical calculation.

All the quantum chemical calculation was carried using Gaussian09 program with B3LYP/6-311++G(d,p) level of theory. The X-ray geometries of compound **3g** were taken for structural optimization. The *trans* configuration of compound **3g** was modeled

using Gaussview from the *cis* conformer of the X-ray structure. The *cis* and *trans* conformers were fully optimized without any geometrical constraints followed by vibrational frequency calculation. The frequency calculation revealed that no negative frequency was obtained for *cis* and *trans* conformers. This is indicating that both conformers are in the energy minima on their potential energy surface. It is also indicating that the *cis* conformer ((*Z*)-isomer) is found to be 2.6 kcal mol<sup>-1</sup> more stable form than the corresponding *trans* conformer ((*E*)-isomer). The optimized structures of these conformers are depicted in Fig. S1.

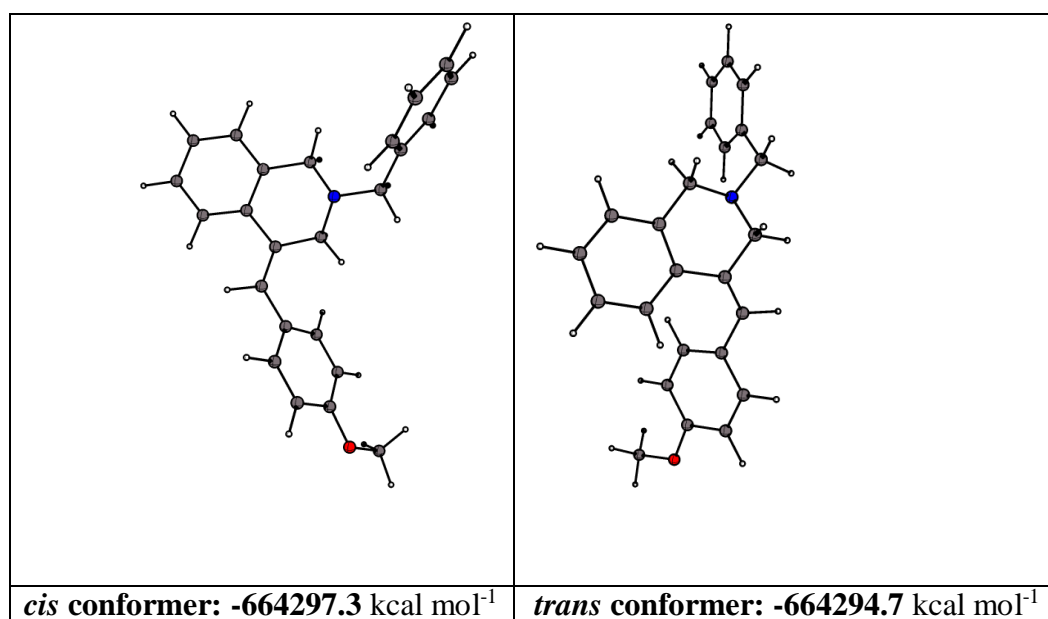

**Fig. S1.** Optimized structures of *cis* and *trans* conformers of compound **3g**.

#### Coordinates for optimized *trans* conformer (compound **3g**)

|   |              |              |             |
|---|--------------|--------------|-------------|
| C | -2.550688000 | 2.676856000  | 1.053462000 |
| C | -2.785183000 | 1.312611000  | 1.239296000 |
| C | -1.716411000 | 0.434140000  | 1.342270000 |
| C | -0.387123000 | 0.888014000  | 1.260616000 |
| C | -0.158123000 | 2.270804000  | 1.120802000 |
| C | -1.243698000 | 3.144797000  | 1.003741000 |
| C | 0.780324000  | -0.008823000 | 1.414232000 |
| C | 2.008046000  | 0.711368000  | 1.929987000 |
| N | 2.288349000  | 1.848695000  | 1.049430000 |
| C | 1.238158000  | 2.854316000  | 1.157282000 |
| C | 0.866866000  | -1.324777000 | 1.133759000 |
| C | 3.618308000  | 2.415491000  | 1.259069000 |
| C | 4.044284000  | 3.370133000  | 0.159312000 |

|   |              |              |              |
|---|--------------|--------------|--------------|
| C | 3.903763000  | 3.011230000  | -1.186383000 |
| C | 4.329799000  | 3.869120000  | -2.196723000 |
| C | 4.905366000  | 5.100166000  | -1.878022000 |
| C | 5.048260000  | 5.466588000  | -0.542207000 |
| C | 4.616721000  | 4.606044000  | 0.468084000  |
| C | -0.083174000 | -2.236671000 | 0.467358000  |
| C | -0.779141000 | -1.886541000 | -0.694758000 |
| C | -1.623316000 | -2.786684000 | -1.343497000 |
| C | -1.786076000 | -4.077944000 | -0.833229000 |
| C | -1.083790000 | -4.455264000 | 0.317259000  |
| C | -0.241594000 | -3.550628000 | 0.944365000  |
| O | -2.588340000 | -5.035255000 | -1.384493000 |
| C | -3.325767000 | -4.711612000 | -2.555120000 |
| H | -3.380493000 | 3.368803000  | 0.962394000  |
| H | -3.800092000 | 0.937607000  | 1.310316000  |
| H | -1.906491000 | -0.618706000 | 1.501308000  |
| H | -1.056003000 | 4.207388000  | 0.881317000  |
| H | 2.869586000  | 0.041967000  | 1.918889000  |
| H | 1.853831000  | 1.042979000  | 2.976418000  |
| H | 1.342635000  | 3.422255000  | 2.105612000  |
| H | 1.358378000  | 3.579791000  | 0.348123000  |
| H | 1.802485000  | -1.805940000 | 1.415340000  |
| H | 4.325071000  | 1.579166000  | 1.294620000  |
| H | 3.692107000  | 2.932462000  | 2.234572000  |
| H | 3.446138000  | 2.059194000  | -1.431075000 |
| H | 4.213938000  | 3.577857000  | -3.235072000 |
| H | 5.236715000  | 5.767728000  | -2.665623000 |
| H | 5.489472000  | 6.423064000  | -0.284101000 |
| H | 4.724743000  | 4.900368000  | 1.507472000  |
| H | -0.654798000 | -0.893707000 | -1.110111000 |
| H | -2.135048000 | -2.473343000 | -2.243790000 |
| H | -1.209250000 | -5.462380000 | 0.696566000  |
| H | 0.301376000  | -3.862340000 | 1.830860000  |
| H | -3.891409000 | -5.607076000 | -2.807608000 |
| H | -2.662159000 | -4.455699000 | -3.388339000 |
| H | -4.019552000 | -3.883312000 | -2.374478000 |

Total energy: -1058.6207130 au

Number of imaginary frequency: 0

### Coordinates for optimized cis conformer (compound 3g)

|   |              |              |              |
|---|--------------|--------------|--------------|
| O | 8.196154000  | 5.959044000  | 6.037727000  |
| N | 6.314354000  | 2.752951000  | 12.835661000 |
| C | 8.562340000  | 3.209714000  | 9.180835000  |
| C | 6.555344000  | 2.448207000  | 11.424615000 |
| H | 6.472292000  | 3.375929000  | 10.859438000 |
| H | 5.783596000  | 1.753621000  | 11.031172000 |
| C | 7.936840000  | 1.857038000  | 11.247206000 |
| C | 8.313069000  | 0.838225000  | 12.254364000 |
| C | 9.465610000  | 4.958253000  | 7.736137000  |
| H | 10.277338000 | 5.611212000  | 7.438466000  |
| C | 8.790787000  | 2.266960000  | 10.284397000 |
| C | 7.365367000  | 3.291506000  | 8.457398000  |
| H | 6.551305000  | 2.615556000  | 8.688853000  |
| C | 8.249614000  | 5.040142000  | 7.044821000  |
| C | 6.297221000  | 1.535930000  | 13.633623000 |
| H | 5.400928000  | 0.924185000  | 13.394763000 |
| H | 6.217049000  | 1.806045000  | 14.689117000 |
| C | 5.109435000  | 3.557936000  | 13.026282000 |
| H | 4.193297000  | 2.976970000  | 12.807661000 |
| H | 5.144513000  | 4.371808000  | 12.293826000 |
| C | 4.998372000  | 4.154282000  | 14.416644000 |
| C | 7.199609000  | 4.192751000  | 7.404776000  |
| H | 6.259511000  | 4.209917000  | 6.869658000  |
| C | 9.413217000  | -0.023191000 | 12.083796000 |
| H | 10.001259000 | 0.033124000  | 11.176041000 |
| C | 7.530781000  | 0.691472000  | 13.416224000 |
| C | 9.615025000  | 4.054671000  | 8.773291000  |
| H | 10.564880000 | 4.003332000  | 9.295486000  |
| C | 7.876536000  | -0.265030000 | 14.374335000 |
| H | 7.270734000  | -0.356652000 | 15.270805000 |
| C | 3.801269000  | 4.080303000  | 15.132255000 |
| H | 2.952378000  | 3.558181000  | 14.701543000 |
| C | 6.085495000  | 4.822904000  | 14.991682000 |
| H | 7.021618000  | 4.870012000  | 14.446745000 |
| C | 8.979619000  | -1.091992000 | 14.199880000 |
| H | 9.235264000  | -1.827549000 | 14.954149000 |
| C | 9.748671000  | -0.969762000 | 13.041329000 |
| H | 10.601370000 | -1.620017000 | 12.880658000 |
| C | 3.684047000  | 4.666609000  | 16.393192000 |
| H | 2.746939000  | 4.598581000  | 16.934842000 |
| C | 6.991248000  | 6.083373000  | 5.294541000  |
| H | 7.172353000  | 6.869768000  | 4.563678000  |

|   |             |             |              |
|---|-------------|-------------|--------------|
| H | 6.152850000 | 6.372242000 | 5.937732000  |
| H | 6.746086000 | 5.152511000 | 4.771672000  |
| C | 4.770810000 | 5.330518000 | 16.956525000 |
| H | 4.684583000 | 5.784499000 | 17.937460000 |
| C | 5.973061000 | 5.405158000 | 16.251379000 |
| H | 6.824223000 | 5.919184000 | 16.684641000 |
| H | 9.807640000 | 1.886468000 | 10.327276000 |

Total energy: -1058.6248977 au

Number of imaginary frequency: 0

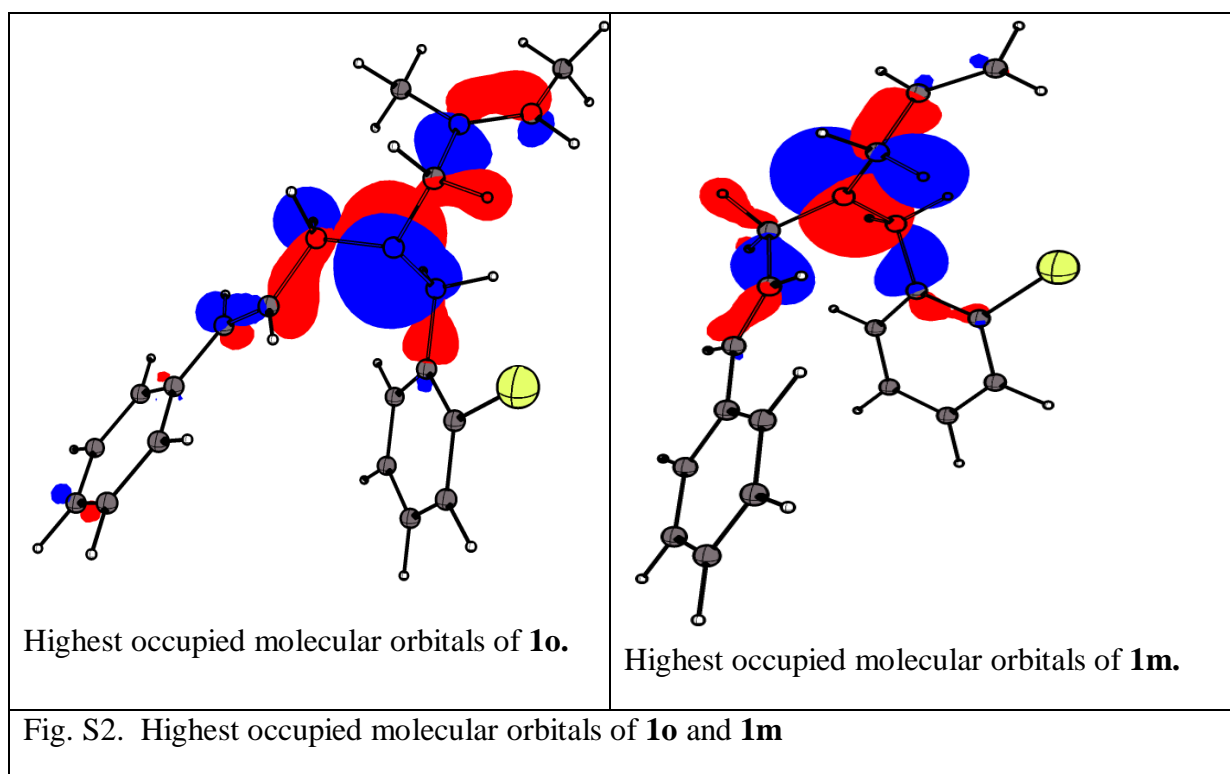

### Coordinates for optimized structure of **1o**

|    |              |              |              |
|----|--------------|--------------|--------------|
| Br | -0.861792540 | -1.349154505 | -2.232591172 |
| C  | -2.290323013 | -2.336275347 | 3.884725883  |
| C  | -1.388357262 | -0.909706847 | 5.599018304  |
| C  | -2.531886104 | -1.103810998 | 6.370174392  |
| C  | -3.432178808 | -2.530219042 | 4.652249153  |
| C  | -0.013948254 | -1.273336920 | 3.572498548  |
| C  | -3.561089211 | -1.915597574 | 5.899846204  |
| C  | 0.291223734  | -1.728814892 | 2.352134599  |
| C  | 4.227857921  | -0.316347385 | -1.840671960 |



|   |              |              |              |
|---|--------------|--------------|--------------|
| C | -1.242492147 | -1.518143253 | 4.341935619  |
| C | 1.612612187  | -1.485201583 | 1.670942528  |
| C | -2.274125405 | 1.548005863  | 1.180614011  |
| C | -3.196929140 | 0.941205710  | 0.333189559  |
| C | -2.754685273 | 0.074346535  | -0.662929360 |
| C | -0.918403076 | 1.274871481  | 1.030466973  |
| C | -1.392545917 | -0.182679786 | -0.794668560 |
| C | 3.878630730  | -0.896717096 | -0.683707039 |
| C | 1.055441012  | 0.162178753  | -0.088013855 |
| C | -0.438964459 | 0.397990082  | 0.049845546  |
| C | 2.582496034  | -1.696603528 | -0.616742547 |
| H | 2.163903695  | -0.705383335 | 2.226049912  |
| H | 2.207513669  | -2.402183389 | 1.756347121  |
| H | -0.403079440 | -2.351106783 | 1.794366914  |
| H | 2.176559451  | -1.785128273 | -1.628402138 |
| H | 1.339171486  | 0.355634266  | -1.124903659 |
| H | 1.574710105  | 0.920832587  | 0.520389121  |
| H | 0.715674954  | -0.639118474 | 4.075032220  |
| H | -4.227076692 | -3.166266314 | 4.278167427  |
| H | -4.452740149 | -2.071435988 | 6.496468416  |
| H | -2.617187169 | -0.621803419 | 7.337922315  |
| H | -0.590364374 | -0.276540228 | 5.974121046  |
| H | -2.212020867 | -2.826782704 | 2.921708779  |
| H | -2.607499976 | 2.225571049  | 1.957962208  |
| H | -4.257248346 | 1.140463138  | 0.438206416  |
| H | -3.459108580 | -0.392929967 | -1.339113356 |
| H | 3.547865659  | -0.444933577 | -2.682110015 |
| H | 2.802431052  | -2.715135745 | -0.277246218 |
| N | 1.501232659  | -1.189794506 | 0.244269641  |
| H | -0.200854754 | 1.743089829  | 1.696033155  |
| C | 5.450582445  | 0.498242960  | -2.151096659 |
| C | 4.703230751  | -0.836815490 | 0.578880857  |
| H | 6.002888286  | 0.061337756  | -2.990660458 |
| H | 5.170831104  | 1.512615203  | -2.458339790 |
| H | 6.136591056  | 0.586197055  | -1.308093647 |
| H | 5.701494113  | -0.432526019 | 0.410501276  |
| H | 4.222828753  | -0.216903636 | 1.343330364  |
| H | 4.817707834  | -1.836156004 | 1.012891743  |

Total energy: -3443.7649532 au

Number of imaginary frequency: 0

### Coordinates for optimized structure of 1m

|    |              |              |              |
|----|--------------|--------------|--------------|
| Br | -0.433432203 | -0.855990223 | -1.697191989 |
| C  | -1.865796619 | -2.928972546 | 3.512753711  |
| C  | -2.345781768 | -1.186203287 | 5.099335194  |
| C  | -3.489438093 | -1.867154705 | 5.509483472  |
| C  | -3.007144027 | -3.609227878 | 3.919436990  |
| C  | -0.316693798 | -0.934093276 | 3.703799541  |
| C  | -3.826755479 | -3.083216998 | 4.920476649  |
| C  | 0.600865764  | -1.256400496 | 2.785700441  |
| C  | 3.603900476  | -1.502620828 | -1.968147791 |
| C  | -1.510222639 | -1.699963264 | 4.094936894  |
| C  | 1.833561072  | -0.431793014 | 2.483457236  |
| C  | -1.843639787 | 2.184268235  | 1.590299275  |
| C  | -2.766674461 | 1.479214763  | 0.823218323  |
| C  | -2.317312360 | 0.572680159  | -0.132208782 |
| C  | -0.483997759 | 1.960689265  | 1.405600815  |
| C  | -0.949567456 | 0.367455817  | -0.297788669 |
| C  | 3.638994564  | -1.093733283 | -0.702153983 |
| C  | 1.523154594  | 0.864597539  | 0.356430041  |
| C  | 0.007903550  | 1.034420779  | 0.474338693  |
| C  | 2.597470157  | -1.416972803 | 0.337612751  |
| H  | 1.748282238  | 0.547786481  | 2.965878711  |
| H  | 2.699289601  | -0.924781323 | 2.948698850  |
| H  | 0.510604732  | -2.183282526 | 2.224356888  |
| H  | 1.776377623  | -1.981133907 | -0.127072083 |
| H  | 1.801468356  | 0.769992236  | -0.694794202 |
| H  | 1.960697594  | 1.806695516  | 0.711398440  |
| H  | -0.190118935 | 0.005947530  | 4.239507007  |
| H  | -3.261086077 | -4.555469746 | 3.454195042  |
| H  | -4.715930857 | -3.617198536 | 5.235877508  |
| H  | -4.115900182 | -1.447274524 | 6.288848527  |
| H  | -2.090537614 | -0.238706381 | 5.563389329  |
| H  | -1.247194516 | -3.357133705 | 2.732777668  |
| H  | -2.179886187 | 2.906296047  | 2.325560254  |
| H  | -3.831020997 | 1.636486421  | 0.954223369  |
| H  | -3.022014898 | 0.033919247  | -0.752338037 |
| H  | 4.401233708  | -1.266701270 | -2.664086677 |
| H  | 2.776249939  | -2.090631861 | -2.352494334 |
| H  | 3.057029170  | -2.087015405 | 1.075224711  |

|   |             |              |              |
|---|-------------|--------------|--------------|
| N | 2.164371536 | -0.234252782 | 1.077448335  |
| H | 4.474151804 | -0.492426954 | -0.347894865 |
| H | 0.232539590 | 2.519699384  | 1.999212364  |

Total energy: -3365.1059389 au

Number of imaginary frequency: 0
